# Supplementary material
Source: publisher figshare collection journal article supplement (https://rs.figshare.com/ndownloader/files/15580004)
Supplement: Supplementary file 1 [file 15580004]

File_name	Date	Time	Duration_Clip	ID	Age_Class	age	inf_age	parity	sex	comb	Follow_Type	num_bouts	Bout_ID	series	Start_Scratch	End_Scratch	Latency_Scratch	persist	duration	Number_Scratch	rate	handedness	bp_scratched	amplitude	SubCon_Before	SubCon_During	SubCon_After	leave	party_present	Party_ID	Party_Relation	rel_party	gaze	adjust	response
MAH00010	20130920	06:23	00:00:23	Friska	Mother	60	13	6	F	A-F	Full	1	1	0	0:00*	00:04	NA	0	4	4	1	right	body	1	R	R	M	1	0	Frankie	Infant	off	NA	NA	NA
MAH00012	20130920	06:43	00:01:00	Friska	Mother	60	13	6	F	A-F	Full	2	1	1	0:00*	00:05	NA	0	5	6	1.2	NA	head	0	F?	R	R	0	1	Frankie	Infant	off	1	1	0
MAH00012	20130920	06:43	00:01:00	Friska	Mother	60	13	6	F	A-F	Full	2	2	1	00:06	00:12	00:01	0	6	6	1	right	limbs	1	R	R	M	1	1	Frankie	Infant	off	0	1	1
MAH00013	20130920	06:50	00:00:31	Friska	Mother	60	13	6	F	A-F	Full	1	1	0	0:00*	00:03	NA	0	3	3	1	right	limbs	1	F	R	M	1	0	Frankie	Infant	off	NA	NA	NA
MAH00016	20130920	07:17	00:00:46	Friska	Mother	60	13	6	F	A-F	Full	1	1	0	0:00*	00:05	NA	0	5	5	1	right	head	0	M	R	R	0	0	Frankie	Infant	off	NA	NA	NA
MAH00018	20130920	07:22	00:01:05	Friska	Mother	60	13	6	F	A-F	Full	1	1	0	00:03	00:07	NA	0	4	5	1.25	right	limbs	1	M	Bridge	M	1	0	Frankie	Infant	off	NA	NA	NA
MAH00023	20130920	07:31	00:00:30	Friska	Mother	60	13	6	F	A-F	Full	1	1	0	00:04	00:08	NA	0	4	3	0.75	right	head	0	M	Bridge	M	1	0	Frankie	Infant	off	NA	NA	NA
MAH00024	20130920	07:37	00:01:02	Friska	Mother	60	13	6	F	A-F	Full	1	1	0	00:02	00:06	NA	0	4	3	0.75	right	limbs	1	M	Bridge	M	1	0	Frankie	Infant	off	NA	NA	NA
MAH00031	20130920	08:09	00:00:37	Friska	Mother	60	13	6	F	A-F	Full	2	1	1	0:00*	00:05	NA	0	5	5	1	left	body	1	F-Ins?	R	R	0	0	Frankie	Infant	off	NA	NA	NA
MAH00031	20130920	08:09	00:00:37	Friska	Mother	60	13	6	F	A-F	Full	2	2	1	00:15	00:25	00:10	1	10	10	1	right	limbs	1	R	R	M	1	0	Frankie	Infant	off	NA	NA	NA
MAH00035	20130920	08:42	00:01:21	Friska	Mother	60	13	6	F	A-F	Full	1	1	0	00:22	00:27	NA	0	5	5	1	right	head	0	F-Ins?	R	R	0	0	Frankie	Infant	off	NA	NA	NA
MAH00040	20130920	09:13	00:00:30	Friska	Mother	60	13	6	F	A-F	Full	1	1	0	0:00*	00:02	NA	0	2	2	1	left	head	0	Rs	Rs	Rs	0	1	Frankie	Infant	off	NA	0	0
MAH00042	20130920	09:15	00:00:12	Friska	Mother	60	13	6	F	A-F	Full	1	1	0	0:00*	0:00*	NA	NA	1	1	1	left	limbs	1	Rs	Rs	Rs	0	1	Frankie	Infant	off	0	0	0
MAH00067	20130920	10:38	00:01:05	Friska	Mother	60	13	6	F	A-F	Full	1	1	0	00:46	00:52	NA	0	6	8	1.333333333	right	limbs	1	Rs	Rs	Rs	0	0	Frankie	Infant	off	NA	NA	NA
MAH00068	20130920	10:47	00:06:36	Friska	Mother	60	13	6	F	A-F	Full	2	1	1	03:40	03:43	NA	0	3	4	1.333333333	right	limbs	1	Rs	Rs	Rs	0	1	Frankie	Infant	off	0	0	1
MAH00068	20130920	10:47	00:06:36	Friska	Mother	60	13	6	F	A-F	Full	2	2	1	05:35	05:42	01:52	0	7	6	0.857142857	right	body	1	Rs	Rs	Rs	0	1	Frankie	Infant	off	0	0	NA
MAH00070	20130920	11:03	00:00:28	Friska	Mother	60	13	6	F	A-F	Full	4	1	1	00:07	00:14	NA	0	7	9	1.285714286	right	body	1	M	Bridge	Bridge	1	1	Frankie	Infant	off	0	1	1
MAH00070	20130920	11:03	00:00:28	Friska	Mother	60	13	6	F	A-F	Full	4	2	1	00:14	00:15	00:00	0	1	1	1	right	limbs	1	Bridge	Bridge	Bridge	1	0	Frankie	Infant	off	NA	NA	NA
MAH00070	20130920	11:03	00:00:28	Friska	Mother	60	13	6	F	A-F	Full	4	3	1	00:16	00:18	00:01	0	2	2	1	right	body	1	Bridge	Bridge	Bridge	1	0	Frankie	Infant	off	NA	NA	NA
MAH00070	20130920	11:03	00:00:28	Friska	Mother	60	13	6	F	A-F	Full	4	4	1	00:18	00:21	00:00	0	3	4	1.333333333	right	limbs	1	Bridge	Bridge	M	1	0	Frankie	Infant	off	NA	NA	NA
MAH00071	20130920	11:05	00:00:40	Friska	Mother	60	13	6	F	A-F	Full	1	1	0	0:00*	0:00*	NA	NA	3	3	1	right	body	1	R?	R	?	NA	1	Frankie	Infant	off	0	1	0
MAH00072	20130920	11:06	00:00:35	Friska	Mother	60	13	6	F	A-F	Full	1	1	0	0:00*	00:03	NA	0	3	3	1	both	body	1	R?	R	?	NA	1	Frankie	Infant	off	0	0	0
MAH00073	20130920	11:13	00:00:57	Friska	Mother	60	13	6	F	A-F	Full	1	1	0	0:00*	00:05	NA	0	5	7	1.4	left	body	1	M?	Bridge	M	1	1	Frankie	Infant	off	0	NA	NA
MAH00074	20130920	11:14	00:00:49	Friska	Mother	60	13	6	F	A-F	Full	1	1	0	0:00*	00:02	NA	0	2	2	1	left	limbs	1	?	Bridge?	?	NA	1	Frankie	Infant	off	0	NA	NA
MAH00081	20130920	12:23	00:01:48	Fredy	Juvenile	8	NA	NA	M	D-M	Full	4	1	1	00:05	00:07	NA	0	2	2	1	right	head	0	R	R	R	0	1	Friska+Frankie	Mother+Sibling	mot	1	0	0
MAH00081	20130920	12:23	00:01:48	Fredy	Juvenile	8	NA	NA	M	D-M	Full	4	2	1	00:41	00:48	00:34	0	7	8	1.142857143	left	limbs	1	R	R	R	0	1	Friska+Frankie	Mother+Sibling	mot	1	0	0
MAH00081	20130920	12:23	00:01:48	Fredy	Juvenile	8	NA	NA	M	D-M	Full	4	3	1	00:51	01:05	00:03	1	14	12	0.857142857	left	body	1	R	R	R	0	1	Friska+Frankie	Mother+Sibling	mot	1	NA	0
MAH00081	20130920	12:23	00:01:48	Fredy	Juvenile	8	NA	NA	M	D-M	Full	4	4	1	01:05	01:10	00:00	0	5	4	0.8	left	limbs	1	R	R	M	1	1	Friska+Frankie	Mother+Sibling	mot	1	NA	0
MAH00082	20130920	12:28	00:01:42	Friska	Mother	60	13	6	F	A-F	Full	5	1	1	0:00*	00:05	NA	0	5	5	1	right	limbs	1	R	R	R	0	0	Frankie	Infant	off	NA	NA	NA
MAH00082	20130920	12:28	00:01:42	Friska	Mother	60	13	6	F	A-F	Full	5	2	1	00:06	00:08	00:01	0	2	3	1.5	right	body	1	R	R	R	0	0	Frankie	Infant	off	NA	NA	NA
MAH00082	20130920	12:28	00:01:42	Friska	Mother	60	13	6	F	A-F	Full	5	3	1	00:10	00:10	00:02	1	1	1	1	right	limbs	1	R	R	R	0	0	Frankie	Infant	off	NA	NA	NA
MAH00082	20130920	12:28	00:01:42	Friska	Mother	60	13	6	F	A-F	Full	5	4	1	01:08	01:09	00:58	0	1	2	2	right	body	1	Gr	R	M	1	0	Frankie	Infant	off	NA	NA	NA
MAH00082	20130920	12:28	00:01:42	Friska	Mother	60	13	6	F	A-F	Full	5	5	1	01:23	01:25	00:14	1	2	3	1.5	left	body	1	M	R	M	1	0	Frankie	Infant	off	NA	NA	NA
MAH00082	20130920	12:28	00:01:42	Frankie	Infant	1	NA	NA	M	D-M	Full	2	1	1	00:02	00:02	NA	0	1	1	1	right	head	0	R?	R	R	0	0	Friska	Mother	mot	NA	NA	NA
MAH00082	20130920	12:28	00:01:42	Frankie	Infant	1	NA	NA	M	D-M	Full	2	2	1	00:17	00:19	00:15	1	2	3	1.5	right	limbs	1	R	R	Gr	0	0	Friska	Mother	mot	NA	NA	NA
MAH00084	20130920	12:32	00:00:22	Friska	Mother	60	13	6	F	A-F	Full	1	1	0	0:00*	00:01	NA	0	1	2	2	left	body	1	R?	R	M*	1	1	Frankie	Infant	off	0	NA	0
MAH00085	20130920	12:36	00:00:47	Friska	Mother	60	13	6	F	A-F	Full	1	1	0	0:00*	00:01	NA	0	1	1	1	left	body	1	F-Ins?	R	M	1	1	Frankie	Infant	off	0	NA	1
MAH00086	20130920	12:40	00:02:31	Friska	Mother	60	13	6	F	A-F	Full	4	1	1	00:24	00:27	NA	0	3	3	1	right	body	1	M	R	R	0	1	Frankie	Infant	off	NA	0	0
MAH00086	20130920	12:40	00:02:31	Friska	Mother	60	13	6	F	A-F	Full	4	2	1	00:29	00:31	00:02	1	2	2	1	right	limbs	1	R	R	R	0	1	Frankie	Infant	off	NA	0	1
MAH00086	20130920	12:40	00:02:31	Friska	Mother	60	13	6	F	A-F	Full	4	3	1	00:37	00:37	00:06	1	1	1	1	right	head	0	R	R	M	1	0	Frankie	Infant	off	NA	NA	NA
MAH00086	20130920	12:40	00:02:31	Friska	Mother	60	13	6	F	A-F	Full	4	4	1	01:12	01:14	00:35	0	2	2	1	left	limbs	1	?	R?	F-Ins	0	1	Frankie	Infant	off	0	1	0
MAH00087	20130920	12:41	00:00:43	Friska	Mother	60	13	6	F	A-F	Full	1	1	0	0:00*	00:09	NA	0	9	11	1.222222222	left	body	1	M?	R	M?	1	1	Frankie	Infant	off	NA	0	0
MAH00088	20130920	12:45	00:01:00	Friska	Mother	60	13	6	F	A-F	Full	1	1	0	0:00*	00:05	NA	0	5	6	1.2	left	limbs	1	F-Ins?	R	F-Ins	0	1	Frankie	Infant	off	0	1	1
MAH00093	20130920	13:34	00:00:58	Friska	Mother	60	13	6	F	A-F	Full	1	1	0	00:08	00:09	NA	0	1	2	2	left	head	0	F-Ins	F-Ins	F-Ins	0	0	Frankie	Infant	off	NA	NA	NA
MAH00095	20130920	13:41	00:01:04	Friska	Mother	60	13	6	F	A-F	Full	1	1	0	00:32	00:34	NA	0	2	2	1	right	limbs	1	R	R	M?	1	0	Frankie	Infant	off	NA	NA	NA
MAH00096	20130920	13:53	00:00:38	Friska	Mother	60	13	6	F	A-F	Full	1	1	0	0:00*	0:00*	NA	NA	NA	NA	NA	NA	head	1	R?	R	M	1	1	Frankie	Infant	off	1	1	1
MAH00097	20130920	13:55	00:00:40	Friska	Mother	60	13	6	F	A-F	Full	3	1	1	0:00*	00:05	NA	0	5	5	1	right	limbs	1	R?	R	R	0	1	Frankie	Infant	off	0	0	0
MAH00097	20130920	13:55	00:00:40	Friska	Mother	60	13	6	F	A-F	Full	3	2	1	00:10	00:17	00:05	1	7	8	1.142857143	right	body	1	R	R	R	0	1	Frankie	Infant	off	0	0	0
MAH00097	20130920	13:55	00:00:40	Friska	Mother	60	13	6	F	A-F	Full	3	3	1	00:17	00:20	00:00	0	3	4	1.333333333	right	body	1	R	R	M?	1	1	Frankie	Infant	off	0	0	1
MAH00098	20130920	14:00	00:00:12	Friska	Mother	60	13	6	F	A-F	Full	1	1	0	0:00*	00:02	NA	0	2	2	1	left	body	1	Bridge	Bridge	M	1	0	Frankie	Infant	off	NA	NA	NA
MAH00107	20130920	15:02	00:01:00	Friska	Mother	60	13	6	F	A-F	Full	1	1	0	0:00*	00:02	NA	0	2	3	1.5	left	head	0	R	R	R	0	0	Frankie	Infant	off	NA	NA	NA
MAH00108	20130920	15:04	00:02:01	Friska	Mother	60	13	6	F	A-F	Full	1	1	0	01:00	01:14	NA	0	14	5	0.357142857	left	head	0	R	R	R	0	0	Frankie	Infant	off	NA	NA	NA
MAH00110	20130920	15:10	00:00:30	Friska	Mother	60	13	6	F	A-F	Full	1	1	0	0:00*	0:00*	NA	NA	2	2	1	object	head	0	R	R	R	0	0	Frankie	Infant	off	NA	NA	NA
MAH00111	20130920	15:11	00:00:15	Friska	Mother	60	13	6	F	A-F	Full	1	1	0	0:00*	00:01	NA	0	1	1	1	right	head	0	R	R	R	0	0	Frankie	Infant	off	NA	NA	NA
MAH00114	20130920	15:15	00:00:20	Friska	Mother	60	13	6	F	A-F	Full	1	1	0	00:02	00:03	NA	0	1	2	2	left	head	0	R?	R	M	1	0	Frankie	Infant	off	NA	NA	NA
MAH00115	20130920	15:30	00:01:12	Friska	Mother	60	13	6	F	A-F	Full	1	1	0	00:56	01:00	NA	0	4	4	1	right	limbs	1	M	Bridge	M	1	0	Frankie	Infant	off	NA	NA	NA
MAH00116	20130920	15:33	00:00:41	Friska	Mother	60	13	6	F	A-F	Full	1	1	0	00:21	00:33	NA	0	12	14	1.166666667	right	limbs	1	M	Bridge	M	1	0	Frankie	Infant	off	NA	NA	NA
MAH00119	20130920	15:45	00:01:00	Fredy	Juvenile	8	NA	NA	M	D-M	Full	2	1	1	00:22	00:27	NA	0	5	6	1.2	left	limbs	1	R	Bridge	R	0	1	Friska+Frankie	Mother+Sibling	mot	1	0	0
MAH00119	20130920	15:45	00:01:00	Fredy	Juvenile	8	NA	NA	M	D-M	Full	2	2	1	00:27	00:31	00:00	0	4	4	1	left	NA	NA	R	Bridge	F-Ins?	0	1	Friska+Frankie	Mother+Sibling	mot	1	0	0
MAH00122	20130920	15:49	00:00:31	Fredy	Juvenile	8	NA	NA	M	D-M	Full	1	1	0	0:00*	00:04	NA	0	4	5	1.25	right	limbs	1	?	Bridge	M	1	1	Friska+Frankie	Mother	mot	NA	1	NA
MAH00123	20130920	15:52	00:00:27	Friska	Mother	60	13	6	F	A-F	Full	1	1	0	00:10	00:11	NA	0	1.5	2	1.333333333	left	body	1	F-Ins?	R	M	1	0	Frankie	Infant	off	NA	NA	NA
MAH00126	20130920	15:59	00:01:04	Friska	Mother	60	13	6	F	A-F	Full	1	1	0	00:36	00:36	NA	0	1	1	1	right	limbs	1	F-Ins	Bridge	M*	1	1	Frankie	Infant	off	1	NA	1
MAH00127	20130920	16:10	00:01:03	Friska	Mother	60	13	6	F	A-F	Full	1	1	0	0:00*	0:00*	NA	NA	NA	2	NA	left	head	0	?	R	M	1	0	Frankie	Infant	off	NA	NA	NA
MAH00131	20130920	17:08	00:13:00	Friska	Mother	60	13	6	F	A-F	Full	1	1	0	02:24	02:31	NA	0	7	7	1	right	limbs	1	Nest	R	Rs	0	1	Frankie	Infant	off	0	0	0
14	20130912	08:35	00:00:21	Lisa	Mother	NA	36	2	F	A-F	Full-Partial	1	1	0	00:00	00:05	NA	0	5	7	1.4	left	head	0	R?	R?	M	1	1	Lois	Infant	off	1	1	1
17	20130912	10:30	00:01:55	Lisa	Mother	NA	36	2	F	A-F	Full-Partial	1	1	0	01:38	01:40	NA	0	2	3	1.5	left	head	0	Rs	Rs	M	1	0	Lois	Infant	off	NA	NA	NA
18	20130912	10:35	00:00:30	Lisa	Mother	NA	36	2	F	A-F	Full-Partial	2	1	1	00:00	00:03	NA	0	3	3	1	left	body	1	Bridge	Bridge	Bridge	1	1	Lois	Infant	off	0	0	0
18	20130912	10:35	00:00:30	Lisa	Mother	NA	36	2	F	A-F	Full-Partial	2	2	1	00:14	00:14	00:11	1	1	1	1	left	head	0	Bridge	Bridge	M	1	1	Lois	Infant	off	0	0	1
21	20130912	10:55	00:03:05	Lois	Infant	3	NA	NA	M	D-M	Full-Partial	2	1	1	01:02	01:31	NA	0	29	41	1.413793103	right	limbs	1	R	R	R	0	1	Lisa	Mother	mot	1	0	0
21	20130912	10:55	00:03:05	Lois	Infant	3	NA	NA	M	D-M	Full-Partial	2	2	1	02:23	02:44	00:52	0	21	23	1.095238095	right	head	0	R	R	R	0	1	Lisa	Mother	mot	0	0	0
21	20130912	10:55	00:03:05	Lisa	Mother	NA	36	2	F	A-F	Full-Partial	1	1	0	02:06	02:21	NA	0	15	23	1.533333333	NA	NA	NA	F-Ins?	F-Ins?	F-Ins	0	1	Lois	Infant	off	NA	NA	0
24	20130912	11:03	00:01:45	Lisa	Mother	NA	36	2	F	A-F	Full-Partial	1	1	0	01:08	01:18	NA	0	10	14	1.4	right	body	1	Bridge	R	M	1	1	Lois	Infant	off	0	1	1
28	20130912	11:36	00:01:32	Lisa	Mother	NA	36	2	F	A-F	Full-Partial	4	1	1	00:28	00:39	NA	0	11	12	1.090909091	right	body	1	M	R	R	0	1	Lois	Infant	off	0	1	1
28	20130912	11:36	00:01:32	Lisa	Mother	NA	36	2	F	A-F	Full-Partial	4	2	1	00:42	00:54	00:03	1	12	13	1.083333333	right	body	1	R	R	R	0	1	Lois	Infant	off	1	1	1
28	20130912	11:36	00:01:32	Lisa	Mother	NA	36	2	F	A-F	Full-Partial	4	3	1	00:54	00:56	00:00	0	2	2	1	right	head	0	R	R	R	0	1	Lois	Infant	off	0	1	1
28	20130912	11:36	00:01:32	Lisa	Mother	NA	36	2	F	A-F	Full-Partial	4	4	1	00:56	01:05	00:00	0	9	10	1.111111111	right	head	0	R	R	M	1	1	Lois	Infant	off	0	1	1
31	20130912	11:47	00:01:04	Lisa	Mother	NA	36	2	F	A-F	Full-Partial	1	1	0	00:05	00:07	NA	0	2	2	1	right	body	1	R	R	R	0	1	Lois	Infant	off	0	1	1
33	20130912	11:50	00:01:11	Lois	Infant	3	NA	NA	M	D-M	Full-Partial	3	1	1	00:16	00:16	NA	0	1	1	1	left	head	0	Rc	Rc	Rc	0	1	Lisa	Mother	mot	0	1	0
33	20130912	11:50	00:01:11	Lois	Infant	3	NA	NA	M	D-M	Full-Partial	3	2	1	00:23	00:23	00:07	1	1	1	1	left	head	0	Rc	Rc	Rc	0	1	Lisa	Mother	mot	0	1	0
33	20130912	11:50	00:01:11	Lois	Infant	3	NA	NA	M	D-M	Full-Partial	3	3	1	00:33	00:35	00:10	1	2	3	1.5	left	limbs	1	Rc	Rc	Rc	0	1	Lisa	Mother	mot	0	1	0
33	20130912	11:50	00:01:11	Lisa	Mother	NA	36	2	F	A-F	Full-Partial	1	1	0	00:46	00:46	NA	0	1	1	1	right	body	1	F-Ins	F-Ins	F-Ins	0	0	Lois	Infant	off	NA	NA	NA
34	20130912	12:07	00:00:45	Lisa	Mother	NA	36	2	F	A-F	Full-Partial	1	1	0	0:10*	00:17	NA	0	7	10	1.428571429	right	limbs	1	Bridge	Bridge	Bridge	1	1	Lois	Infant	off	NA	NA	1
39	20130912	12:55	00:01:10	Lisa	Mother	NA	36	2	F	A-F	Full-Partial	1	1	0	0:00*	00:02	NA	0	2	2	1	right	NA	NA	?	R	M	1	1	Lois	Infant	off	0	0	1
40	20130912	12:57	00:00:57	Lisa	Mother	NA	36	2	F	A-F	Full-Partial	3	1	1	0:00*	00:04	NA	0	4	4	1	left	limbs	1	Bridge?	Bridge	Bridge	1	1	Lois	Infant	off	1	1	0
40	20130912	12:57	00:00:57	Lisa	Mother	NA	36	2	F	A-F	Full-Partial	3	2	1	00:07	00:13	00:03	1	6	8	1.333333333	right	limbs	1	Bridge	Bridge	Bridge	1	1	Lois	Infant	off	0	1	0
40	20130912	12:57	00:00:57	Lisa	Mother	NA	36	2	F	A-F	Full-Partial	3	3	1	00:25	00:30	00:12	1	5	6	1.2	left	head	0	Bridge	Bridge	M	1	1	Lois	Infant	off	0	1	1
41	20130912	13:00	00:00:48	Lois	Infant	3	NA	NA	M	D-M	Full-Partial	1	1	0	00:18	00:18	NA	0	1	1	1	right	limbs	1	M	Bridge	Bridge	1	1	Lisa	Mother	mot	1	1	1
42	20130912	13:05	00:00:23	Lisa	Mother	NA	36	2	F	A-F	Full-Partial	1	1	0	00:14	00:17	NA	0	3	3	1	left	head	0	Bridge	Bridge	M	1	1	Lois	Infant	off	0	1	0
45	20130912	13:13	00:02:13	Lois	Infant	3	NA	NA	M	D-M	Full-Partial	5	1	1	00:43	00:55	NA	0	12	20	1.666666667	right	body	1	R	R	R	0	1	Lisa	Mother	mot	0	0	0
45	20130912	13:13	00:02:13	Lois	Infant	3	NA	NA	M	D-M	Full-Partial	5	2	1	01:15	01:19	00:20	1	4	5	1.25	right	body	1	R	R	R	0	1	Lisa	Mother	mot	0	0	0
45	20130912	13:13	00:02:13	Lois	Infant	3	NA	NA	M	D-M	Full-Partial	5	3	1	01:21	01:36	00:02	1	15	15	1	right	limbs	1	R	R	R	0	1	Lisa	Mother	mot	0	0	0
45	20130912	13:13	00:02:13	Lois	Infant	3	NA	NA	M	D-M	Full-Partial	5	3	1	01:44	01:47	00:08	1	3	3	1	right	limbs	1	R	R	R	0	1	Lisa	Mother	mot	0	0	0
45	20130912	13:13	00:02:13	Lois	Infant	3	NA	NA	M	D-M	Full-Partial	5	4	1	01:48	01:59	00:01	0	11	7	0.636363636	right	limbs	1	R	R	R	0	1	Lisa	Mother	mot	0	0	0
45	20130912	13:13	00:02:13	Lois	Infant	3	NA	NA	M	D-M	Full-Partial	5	5	1	02:10	02:11	00:11	1	1	2	2	right	limbs	1	R	R	?	NA	1	Lisa	Mother	mot	0	0	0
46	20130912	13:17	00:01:17	Lois	Infant	3	NA	NA	M	D-M	Full-Partial	7	1	1	00:05	00:05	NA	0	1	1	1	left	head	0	R?	R	R	0	1	Lisa	Mother	mot	0	0	0
46	20130912	13:17	00:01:17	Lois	Infant	3	NA	NA	M	D-M	Full-Partial	7	2	1	00:10	00:10	00:05	1	1	1	1	left	head	0	R	R	R	0	1	Lisa	Mother	mot	0	0	0
46	20130912	13:17	00:01:17	Lois	Infant	3	NA	NA	M	D-M	Full-Partial	7	3	1	00:12	00:12	00:02	1	1	1	1	left	head	0	R	R	R	0	1	Lisa	Mother	mot	0	0	0
46	20130912	13:17	00:01:17	Lois	Infant	3	NA	NA	M	D-M	Full-Partial	7	4	1	00:13	00:13	00:01	0	1	1	1	left	head	0	R	R	R	0	1	Lisa	Mother	mot	0	0	0
46	20130912	13:17	00:01:17	Lois	Infant	3	NA	NA	M	D-M	Full-Partial	7	5	1	00:14	00:15	00:01	0	1	1	1	left	head	0	R	R	R	0	1	Lisa	Mother	mot	0	0	0
46	20130912	13:17	00:01:17	Lois	Infant	3	NA	NA	M	D-M	Full-Partial	7	6	1	00:19	00:21	00:04	1	2	2	1	left	head	0	R	R	R	0	1	Lisa	Mother	mot	0	0	0
46	20130912	13:17	00:01:17	Lois	Infant	3	NA	NA	M	D-M	Full-Partial	7	7	1	00:29	00:47	00:08	1	18	19	1.055555556	left	head	0	R	R	M	1	1	Lisa	Mother	mot	0	0	0
50	20130912	13:31	00:02:12	Lois	Infant	3	NA	NA	M	D-M	Full-Partial	3	1	1	00:06	00:10	NA	0	4	5	1.25	right	head	0	F-Ins	R	R	0	1	Lisa	Mother	mot	1	0	0
50	20130912	13:31	00:02:12	Lois	Infant	3	NA	NA	M	D-M	Full-Partial	3	2	1	00:11	00:24	00:01	0	13	18	1.384615385	right	head	0	R	R	Peer	0	1	Lisa	Mother	mot	1	0	0
50	20130912	13:31	00:02:12	Lois	Infant	3	NA	NA	M	D-M	Full-Partial	3	3	1	00:46	00:49	00:22	1	3	3	1	right	head	0	Peer	R	F-Ins*	0	1	Lisa	Mother	mot	1	0	0
52	20130912	13:41	00:00:48	Lisa	Mother	NA	36	2	F	A-F	Full-Partial	1	1	0	00:38	00:43	NA	0	5	5	1	left	limbs	1	F-Ins	R	F-Ins?	0	1	Lois	Infant	off	NA	NA	NA
55	20130912	14:40	00:00:53	Lois	Infant	3	NA	NA	M	D-M	Full-Partial	1	1	0	00:07	00:14	NA	0	7	10	1.428571429	right	limbs	1	?	R	F-Ins	0	1	Lisa	Mother	mot	1	1	0
55	20130912	14:40	00:00:53	Lisa	Mother	NA	36	2	F	A-F	Full-Partial	1	1	0	00:27	00:29	NA	0	2	3	1.5	right	head	0	F-Ins	F-Ins	F-Ins	0	1	Lois	Infant	off	1	1	0
57	20130912	14:51	00:01:03	Lisa	Mother	NA	36	2	F	A-F	Full-Partial	1	1	0	0:00*	00:11	NA	0	11	13	1.181818182	right	limbs	1	F-Ins	R	F-Ins	0	1	Lois	Infant	off	1	1	0
58	20130912	15:08	00:00:38	Lois	Infant	3	NA	NA	M	D-M	Full-Partial	1	1	0	0:00*	0:00*	NA	NA	NA	NA	NA	NA	NA	NA	F-Ins	R	F-Ins	0	1	Lisa	Mother	mot	0	0	0
58	20130912	15:08	00:00:38	Lisa	Mother	NA	36	2	F	A-F	Full-Partial	1	1	0	0:00*	00:01	NA	0	1	1	1	right	body	1	F-Ins	R	F-Ins	0	1	Lois	Infant	off	0	0	0
65	20130912	15:38	00:02:55	Lisa	Mother	NA	36	2	F	A-F	Full-Partial	8	1	1	00:50	01:01	NA	0	11	14	1.272727273	right	body	1	M	Bridge	Bridge	1	1	Lois	Infant	off	0	0	1
65	20130912	15:38	00:02:55	Lisa	Mother	NA	36	2	F	A-F	Full-Partial	8	2	1	01:02	01:08	00:01	0	6	8	1.333333333	right	body	1	Bridge	Bridge	Bridge	1	1	Lois	Infant	off	0	1	0
65	20130912	15:38	00:02:55	Lisa	Mother	NA	36	2	F	A-F	Full-Partial	8	3	1	01:16	01:16	00:08	1	1	1	1	right	body	1	Bridge	Bridge	M*	1	1	Lois	Infant	off	0	1	0
65	20130912	15:38	00:02:55	Lisa	Mother	NA	36	2	F	A-F	Full-Partial	8	4	1	01:23	01:26	00:07	1	3	3	1	left	head	0	M*	Bridge	Bridge	1	1	Lois	Infant	off	1	1	1
65	20130912	15:38	00:02:55	Lisa	Mother	NA	36	2	F	A-F	Full-Partial	8	5	1	01:26	01:32	00:00	0	6	7	1.166666667	left	limbs	1	Bridge	Bridge	Bridge	1	1	Lois	Infant	off	0	1	0
65	20130912	15:38	00:02:55	Lisa	Mother	NA	36	2	F	A-F	Full-Partial	8	6	1	01:32	01:36	00:00	0	4	5	1.25	left	body	1	Bridge	Bridge	Bridge	1	1	Lois	Infant	off	0	1	0
65	20130912	15:38	00:02:55	Lisa	Mother	NA	36	2	F	A-F	Full-Partial	8	7	1	01:36	01:40	00:00	0	4	5	1.25	left	limbs	1	Bridge	Bridge	Bridge	1	1	Lois	Infant	off	0	1	0
65	20130912	15:38	00:02:55	Lisa	Mother	NA	36	2	F	A-F	Full-Partial	8	8	1	01:40	01:45	00:00	0	5	5	1	left	body	1	Bridge	Bridge	M	1	1	Lois	Infant	off	0	1	0
65	20130912	15:38	00:02:55	Lois	Infant	3	NA	NA	M	D-M	Full-Partial	3	1	1	01:06	01:21	NA	0	15	19	1.266666667	left	limbs	1	R	R	M*	1	1	Lisa	Mother	mot	1	0	0
65	20130912	15:38	00:02:55	Lois	Infant	3	NA	NA	M	D-M	Full-Partial	3	2	1	01:43	01:45	00:22	1	2	2	1	right	head	0	M*	R	R	0	1	Lisa	Mother	mot	1	0	0
65	20130912	15:38	00:02:55	Lois	Infant	3	NA	NA	M	D-M	Full-Partial	3	3	1	01:46	01:50	00:01	0	4	4	1	right	head	0	R	R	M*	1	1	Lisa	Mother	mot	1	0	0
68	20130912	15:56	00:00:36	Lois	Infant	3	NA	NA	M	D-M	Full-Partial	1	1	0	0:00*	00:02	NA	0	2	3	1.5	right	body	1	R	R	R	0	1	Lisa	Mother	mot	0	0	0
70	20130913	10:33	00:01:04	Lisa	Mother	NA	36	2	F	A-F	Partial	1	1	0	0:20*	00:30	NA	0	10	9	0.9	left	limbs	1	R?	R	M*	1	0	NA	NA	NA	NA	NA	NA
83	20130913	15:25	00:01:40	Lisa	Mother	NA	36	2	F	A-F	Partial	2	1	1	0:00*	00:11	NA	0	11	13	1.181818182	left	body	1	F-Ins?	R	R	0	1	Lois	Infant	off	1	1	1
83	20130913	15:25	00:01:40	Lisa	Mother	NA	36	2	F	A-F	Partial	2	2	1	00:14	00:24	00:03	1	10	10	1	left	body	1	R	R	Bridge	1	1	Lois	Infant	off	0	1	1
92	20130914	08:08	00:02:09	Lisa	Mother	NA	36	2	F	A-F	Full	2	1	1	01:31	01:31	NA	0	1	1	1	right	head	0	F-Ins	F-Ins	F-Ins	0	1	Lois	Infant	off	0	1	0
92	20130914	08:08	00:02:09	Lisa	Mother	NA	36	2	F	A-F	Full	2	2	1	01:37	01:37	00:06	1	1	1	1	right	head	0	F-Ins	F-Ins	F-Ins	0	1	Lois	Infant	off	0	1	0
92	20130914	08:08	00:02:09	Lois	Infant	3	NA	NA	M	D-M	Full	2	1	1	00:51	00:51	NA	0	1	1	1	left	head	0	Gr?	R	Gr?	0	1	Lisa	Mother	mot	1	0	0
92	20130914	08:08	00:02:09	Lois	Infant	3	NA	NA	M	D-M	Full	2	2	1	01:39	01:53	00:48	0	14	16	1.142857143	left	head	0	R	R	M	1	1	Lisa	Mother	mot	1	0	0
95	20130914	08:37	00:02:48	Lois	Infant	3	NA	NA	M	D-M	Full	1	1	0	01:51	02:10	NA	0	19	24	1.263157895	left	body	1	Rc	R	M	1	1	Lisa	Mother	mot	1	0	0
98	20130914	08:50	00:00:21	Lois	Infant	3	NA	NA	M	D-M	Full	1	1	0	0:00*	0:00*	NA	NA	NA	NA	NA	NA	NA	NA	M	R	M	1	1	Lisa	Mother	mot	1	0	0
99	20130914	09:11	00:01:53	Lisa	Mother	NA	36	2	F	A-F	Full	1	1	0	00:13	00:18	NA	0	5	5	1	right	limbs	1	M	Bridge	M	1	1	Lois	Infant	off	0	NA	NA
103	20130914	09:27	00:03:15	Lisa	Mother	NA	36	2	F	A-F	Full	1	1	0	01:49	01:49	NA	0	1	1	1	right	head	0	F-Ins	F-Ins	F-Ins	0	1	Lois	Infant	off	0	NA	0
104	20130914	09:30	00:02:02	Lisa	Mother	NA	36	2	F	A-F	Full	7	1	1	00:24	00:24	NA	0	1	1	1	right	head	0	F-Ins	F-Ins	F-Ins	0	1	Lois	Infant	off	0	NA	0
104	20130914	09:30	00:02:02	Lisa	Mother	NA	36	2	F	A-F	Full	7	2	1	00:27	00:29	00:03	1	2	3	1.5	right	head	0	F-Ins	F-Ins	F-Ins	0	1	Lois	Infant	off	0	NA	0
104	20130914	09:30	00:02:02	Lisa	Mother	NA	36	2	F	A-F	Full	7	3	1	01:09	01:09	00:40	0	1	1	1	right	head	0	F-Ins	F-Ins	F-Ins	0	1	Lois	Infant	off	0	NA	0
104	20130914	09:30	00:02:02	Lisa	Mother	NA	36	2	F	A-F	Full	7	4	1	01:17	01:17	00:08	1	1	1	1	right	head	0	F-Ins	F-Ins	F-Ins	0	1	Lois	Infant	off	0	NA	0
104	20130914	09:30	00:02:02	Lisa	Mother	NA	36	2	F	A-F	Full	7	5	1	01:21	01:22	00:04	1	1	2	2	right	head	0	F-Ins	F-Ins	F-Ins	0	1	Lois	Infant	off	0	NA	0
104	20130914	09:30	00:02:02	Lisa	Mother	NA	36	2	F	A-F	Full	7	6	1	01:25	01:25	00:03	1	1	1	1	right	body	1	F-Ins	F-Ins	F-Ins	0	1	Lois	Infant	off	0	NA	0
104	20130914	09:30	00:02:02	Lisa	Mother	NA	36	2	F	A-F	Full	7	7	1	01:49	01:49	00:24	1	1	1	1	right	head	0	F-Ins	F-Ins	F-Ins	0	1	Lois	Infant	off	0	NA	0
105	20130914	09:35	00:01:28	Lisa	Mother	NA	36	2	F	A-F	Full	2	1	1	00:32	00:42	NA	0	10	13	1.3	left	body	1	F-Ins?	R	R	0	1	Lois	Infant	off	0	NA	0
105	20130914	09:35	00:01:28	Lisa	Mother	NA	36	2	F	A-F	Full	2	2	1	00:43	00:47	00:01	0	4	5	1.25	left	body	1	R	R	M?	1	1	Lois	Infant	off	0	NA	0
122	20130914	10:29	00:04:17	Lois	Infant	3	NA	NA	M	D-M	Full	1	1	0	03:40	03:44	NA	0	4	6	1.5	right	head	0	F-Ins	F-Ins	F-Ins	0	1	Lisa	Mother	mot	0	NA	0
125	20130914	11:03	00:04:44	Lisa	Mother	NA	36	2	F	A-F	Full	3	1	1	00:35	00:35	NA	0	1	1	1	left	limbs	1	F-Ins	F-Ins	F-Ins	0	1	Lois	Infant	off	NA	1	0
125	20130914	11:03	00:04:44	Lisa	Mother	NA	36	2	F	A-F	Full	3	2	1	01:48	01:48	01:13	0	1	1	1	right	limbs	1	F-Ins	R	Gr?	0	1	Lois	Infant	off	1	1	0
125	20130914	11:03	00:04:44	Lisa	Mother	NA	36	2	F	A-F	Full	3	3	1	02:00	02:02	00:12	1	1.5	2	1.333333333	left	body	1	Gr?	?	Gr	0	1	Lois	Infant	off	1	0	0
125	20130914	11:03	00:04:44	Lisa	Mother	NA	36	2	F	A-F	Full	1	1	0	04:07	04:08	NA	0	1.5	2	1.333333333	right	limbs	1	Gr	Gr	Gr	0	1	Lois	Infant	off	1	0	0
125	20130914	11:03	00:04:44	Lois	Infant	3	NA	NA	M	D-M	Full	1	1	0	02:34	02:50	NA	0	16	19	1.1875	left	head	0	R	R	R	0	1	Lisa	Mother	mot	0	1	0
126	20130914	11:09	00:04:53	Lisa	Mother	NA	36	2	F	A-F	Full	7	1	1	0:00*	00:02	NA	0	2	2	1	left	body	1	R	R	M	1	1	Lois	Infant	off	0	1	1
126	20130914	11:09	00:04:53	Lisa	Mother	NA	36	2	F	A-F	Full	7	2	1	00:25	00:32	00:23	1	7	8	1.142857143	left	body	1	M	R	R	0	1	Lois	Infant	off	0	1	1
126	20130914	11:09	00:04:53	Lisa	Mother	NA	36	2	F	A-F	Full	7	3	1	00:32	00:34	00:00	0	2	2	1	left	body	1	R	R	R	0	1	Lois	Infant	off	0	0	1
126	20130914	11:09	00:04:53	Lisa	Mother	NA	36	2	F	A-F	Full	7	4	1	00:34	00:47	00:00	0	13	14	1.076923077	left	body	1	R	R	M	1	1	Lois	Infant	off	0	1	1
126	20130914	11:09	00:04:53	Lisa	Mother	NA	36	2	F	A-F	Full	7	5	1	01:12	01:20	00:25	1	8	11	1.375	right	body	1	M	R	R	0	1	Lois	Infant	off	0	1	1
126	20130914	11:09	00:04:53	Lisa	Mother	NA	36	2	F	A-F	Full	7	6	1	01:20	01:29	00:00	0	9	11	1.222222222	right	body	1	R	R	M	1	1	Lois	Infant	off	0	0	0
126	20130914	11:09	00:04:53	Lisa	Mother	NA	36	2	F	A-F	Full	7	7	1	01:49	01:55	00:20	1	6	8	1.333333333	left	limbs	1	M	R	R	0	1	Lois	Infant	off	0	0	0
127	20130914	11:20	00:01:37	Lisa	Mother	NA	36	2	F	A-F	Full	1	1	0	0:00*	00:11	NA	0	11	11	1	right	body	1	F-Ins	R	M*	1	1	Lois	Infant	off	0	NA	0
128	20130914	11:41	00:14:12	Lisa	Mother	NA	36	2	F	A-F	Full	11	1	1	0:00*	00:03	NA	0	3	3	1	left	body	1	F-Ins	R	F-Ins	0	1	Lois	Infant	off	0	NA	0
128	20130914	11:41	00:14:12	Lisa	Mother	NA	36	2	F	A-F	Full	11	2	1	00:16	00:24	00:13	1	8	7	0.875	left	body	1	F-Ins	R	M	1	1	Lois	Infant	off	0	NA	0
128	20130914	11:41	00:14:12	Lisa	Mother	NA	36	2	F	A-F	Full	11	3	1	00:53	01:02	00:29	1	9	11	1.222222222	left	limbs	1	M	F-Ins	F-Ins	0	1	Lois	Infant	off	0	NA	0
128	20130914	11:41	00:14:12	Lisa	Mother	NA	36	2	F	A-F	Full	11	4	1	01:30	01:33	00:28	1	3	4	1.333333333	right	body	1	F-Ins	F-Ins	F-Ins	0	1	Lois	Infant	off	0	NA	1
128	20130914	11:41	00:14:12	Lisa	Mother	NA	36	2	F	A-F	Full	11	5	1	01:33	01:35	00:00	0	2	2	1	right	body	1	F-Ins	F-Ins	F-Ins	0	1	Lois	Infant	off	0	NA	1
128	20130914	11:41	00:14:12	Lisa	Mother	NA	36	2	F	A-F	Full	11	6	1	01:35	02:01	00:00	0	26	37	1.423076923	right	head	0	F-Ins	R	R	0	1	Lois	Infant	off	1	NA	1
128	20130914	11:41	00:14:12	Lisa	Mother	NA	36	2	F	A-F	Full	11	7	1	02:06	02:10	00:05	1	4	5	1.25	right	head	0	R	R	R	0	1	Lois	Infant	off	0	NA	0
128	20130914	11:41	00:14:12	Lisa	Mother	NA	36	2	F	A-F	Full	11	8	1	02:14	02:16	00:04	1	2	3	1.5	right	head	0	R	R	R	0	1	Lois	Infant	off	0	NA	0
128	20130914	11:41	00:14:12	Lisa	Mother	NA	36	2	F	A-F	Full	11	9	1	02:17	02:25	00:01	0	8	10	1.25	right	head	0	R	R	R	0	1	Lois	Infant	off	0	NA	0
128	20130914	11:41	00:14:12	Lisa	Mother	NA	36	2	F	A-F	Full	11	10	1	02:25	02:27	00:00	0	2	2	1	right	body	1	R	R	M	1	1	Lois	Infant	off	0	NA	0
128	20130914	11:41	00:14:12	Lisa	Mother	NA	36	2	F	A-F	Full	11	11	1	02:34	02:44	00:07	1	10	10	1	right	limbs	1	M	Bridge	M	1	1	Lois	Infant	off	0	NA	1
128	20130914	11:41	00:14:12	Lisa	Mother	NA	36	2	F	A-F	Full	5	1	1	04:55	05:07	NA	0	12	15	1.25	left	body	1	R	R	R	0	1	Lois	Infant	off	0	0	0
128	20130914	11:41	00:14:12	Lisa	Mother	NA	36	2	F	A-F	Full	5	2	1	05:24	05:31	00:17	1	7	9	1.285714286	left	body	1	R	R	R	0	1	Lois	Infant	off	0	0	0
128	20130914	11:41	00:14:12	Lisa	Mother	NA	36	2	F	A-F	Full	5	3	1	05:52	06:09	00:21	1	17	28	1.647058824	left	NA	NA	R	R	R	0	1	Lois	Infant	off	0	0	0
128	20130914	11:41	00:14:12	Lisa	Mother	NA	36	2	F	A-F	Full	5	4	1	07:29	07:43	01:20	0	14	16	1.142857143	right	NA	NA	R	R	R	0	1	Lois	Infant	off	1	0	0
128	20130914	11:41	00:14:12	Lisa	Mother	NA	36	2	F	A-F	Full	5	5	1	07:47	07:51	00:04	1	4	4	1	right	body	1	R	R	R	0	1	Lois	Infant	off	1	0	0
128	20130914	11:41	00:14:12	Lisa	Mother	NA	36	2	F	A-F	Full	2	1	1	10:45	10:56	NA	0	11	14	1.272727273	left	body	1	R	R	R	0	1	Lois	Infant	off	0	1	1
128	20130914	11:41	00:14:12	Lisa	Mother	NA	36	2	F	A-F	Full	2	2	1	11:15	11:18	00:19	1	3	3	1	left	body	1	M	R	M	1	0	Lois	Infant	off	NA	NA	NA
128	20130914	11:41	00:14:12	Lisa	Mother	NA	36	2	F	A-F	Full	1	1	0	13:22	13:28	NA	0	6	6	1	right	body	1	R	R	R	0	1	Lois	Infant	off	1	0	0
130	20130914	12:14	00:02:10	Lois	Infant	3	NA	NA	M	D-M	Full	1	1	0	01:02	01:09	NA	0	7	10	1.428571429	right	body	1	F-Ins	R	F-Ins	0	1	Lisa	Mother	mot	1	0	0
131	20130914	12:17	00:01:05	Lois	Infant	3	NA	NA	M	D-M	Full	4	1	1	00:20	00:20	NA	0	1	1	1	left	head	1	R	R	R	0	1	Lisa	Mother	mot	0	0	0
131	20130914	12:17	00:01:05	Lois	Infant	3	NA	NA	M	D-M	Full	4	2	1	00:20	00:31	00:00	0	11	14	1.272727273	left	head	0	R	R	R	0	1	Lisa	Mother	mot	0	0	0
131	20130914	12:17	00:01:05	Lois	Infant	3	NA	NA	M	D-M	Full	4	3	1	00:33	00:40	00:02	1	7	8	1.142857143	left	head	0	R	R	R	0	1	Lisa	Mother	mot	0	0	0
131	20130914	12:17	00:01:05	Lois	Infant	3	NA	NA	M	D-M	Full	4	4	1	00:44	00:47	00:04	1	3	3	1	left	head	0	R	R	R	0	1	Lisa	Mother	mot	0	0	0
132	20130914	12:39	00:02:00	Lilly	Adolescent	NA	NA	NA	F	D-F	Partial	1	1	0	01:17	01:23	NA	0	6	8	1.333333333	left	limbs	1	F-Ins	R	F-Ins	0	1	Lisa+Lois	Mother+Sibling	mot	0	0	0
134	20130914	12:46	00:00:26	Lisa	Mother	NA	36	2	F	A-F	Full	1	1	0	0:00*	0:00*	NA	NA	5	5	1	NA	NA	NA	Bridge	Bridge	M	1	1	Lois	Infant	off	1	1	1
135	20130914	12:48	00:00:49	Lois	Infant	3	NA	NA	M	D-M	Full	1	1	0	00:39	0:43*	NA	NA	4	6	1.5	left	limbs	1	M	R	M	1	1	Lisa	Mother	mot	1	0	0
136	20130914	12:50	00:01:11	Lisa	Mother	NA	36	2	F	A-F	Full	2	1	1	0:00*	0:00*	NA	NA	3	3	1	NA	NA	NA	F-Ins	F-Ins	F-Ins	0	1	Lois	Infant	off	NA	NA	0
136	20130914	12:50	00:01:11	Lisa	Mother	NA	36	2	F	A-F	Full	2	2	1	00:27	00:35	00:28	1	8	12	1.5	left	body	1	F-Ins	F-Ins	F-Ins	0	1	Lois	Infant	off	1	1	1
137	20130914	13:00	00:01:31	Lilly	Adolescent	NA	NA	NA	F	D-F	Partial	2	1	1	00:20	00:25	NA	0	5	6	1.2	right	limbs	1	F-Ins	F-Ins?	R?	0	1	Lisa+Lois	Mother	mot	0	NA	0
137	20130914	13:00	00:01:31	Lilly	Adolescent	NA	NA	NA	F	D-F	Partial	2	2	1	00:38	00:45	00:13	1	7	8	1.142857143	left	body	1	R	R	R	0	1	Lisa+Lois	Mother	mot	0	NA	0
138	20130914	13:10	00:01:13	Lilly	Adolescent	NA	NA	NA	F	D-F	Partial	1	1	0	00:54	00:56	NA	0	1.5	2	1.333333333	left	limbs	1	R	R	F-Ins?	0	1	Lisa+Lois	Mother	mot	0	NA	0
139	20130914	13:16	00:01:10	Lois	Infant	3	NA	NA	M	D-M	Full	1	1	0	0:00*	00:09	NA	0	9	8	0.888888889	right	head	0	?	?	?	NA	1	Lilly	Sibling	oth	1	1	0
139	20130914	13:16	00:01:10	Lisa	Mother	NA	36	2	F	A-F	Full	1	1	0	00:40	00:47	NA	0	7	9	1.285714286	right	limbs	1	M	R	M	1	1	Lois	Infant	off	1	NA	0
140	20130914	13:24	00:04:01	Lisa	Mother	NA	36	2	F	A-F	Full	4	1	1	00:24	00:37	NA	0	13	17	1.307692308	right	limbs	1	R	R	R	0	1	Lois+Lilly	Infant+Offspring	off	1	0	0
140	20130914	13:24	00:04:01	Lisa	Mother	NA	36	2	F	A-F	Full	4	2	1	00:39	00:45	00:02	1	6	7	1.166666667	right	limbs	1	R	R	M	1	1	Lois+Lilly	Infant+Offspring	off	1	1	0
140	20130914	13:24	00:04:01	Lisa	Mother	NA	36	2	F	A-F	Full	4	3	1	01:11	01:15	00:26	1	4	5	1.25	left	body	1	M	R	R	0	1	Lois+Lilly	Infant+Offspring	off	0	0	0
140	20130914	13:24	00:04:01	Lisa	Mother	NA	36	2	F	A-F	Full	4	4	1	01:16	01:18	00:01	0	2	2	1	left	body	1	R	R	M	1	1	Lois+Lilly	Infant+Offspring	off	0	0	0
144	20130914	14:05	00:01:25	Lisa	Mother	NA	36	2	F	A-F	Full	1	1	0	00:22	00:38	NA	0	16	20	1.25	right	switch	1	Bridge	Bridge	M	1	1	Lois	Infant	off	0	1	1
144	20130914	14:05	00:01:25	Lois	Infant	3	NA	NA	M	D-M	Full	1	1	0	0:00*	00:04	NA	0	4	5	1.25	NA	NA	NA	M?	R	M	1	1	Lisa	Mother	mot	1	0	0
145	20130914	14:15	00:01:20	Lisa	Mother	NA	36	2	F	A-F	Full	5	5	1	01:19	1:20*	NA	NA	2	2	1	right	body	1	M	R	?	NA	1	Lois	Infant	off	0	1	1
147	20130914	14:24	00:02:47	Lois	Infant	3	NA	NA	M	D-M	Full	3	1	1	00:26	00:26	NA	0	1	1	1	right	body	1	F-Ins	Bridge?	F-Ins	0	1	Lisa	Mother	mot	0	0	0
147	20130914	14:24	00:02:47	Lois	Infant	3	NA	NA	M	D-M	Full	3	2	1	00:51	00:51	00:25	1	1	1	1	left	limbs	1	F-Ins	Bridge?	F-Ins	0	1	Lisa	Mother	mot	0	0	0
147	20130914	14:24	00:02:47	Lois	Infant	3	NA	NA	M	D-M	Full	3	3	1	02:03	02:06	01:12	0	3	5	1.666666667	left	body	1	F-Ins	Bridge?	F-Ins	0	1	Lisa	Mother	mot	0	0	0
151	20130914	14:50	00:02:31	Lisa	Mother	NA	36	2	F	A-F	Full	1	1	0	00:58	01:00	NA	0	2	3	1.5	right	head	0	F-Ins	R	F-Ins	0	1	Lois+Lilly	Infant+Offspring	off	NA	0	0
156	20130915	06:36	00:02:10	Lois	Infant	3	NA	NA	M	D-M	Partial	2	1	1	00:51	00:53	NA	0	2	2	1	left	limbs	1	F-Ins	R?	F-Ins	0	1	Lisa	Mother	mot	0	0	0
156	20130915	06:36	00:02:10	Lois	Infant	3	NA	NA	M	D-M	Partial	2	2	1	01:11	01:15	00:18	1	4	7	1.75	left	limbs	1	F-Ins	F-Ins	F-Ins	0	1	Lisa	Mother	mot	0	0	0
157	20130915	06:40	00:00:29	Lois	Infant	3	NA	NA	M	D-M	Partial	1	1	0	0:00*	00:04	NA	0	4	5	1.25	right	body	1	F-Ins?	F-Ins?	M	1	1	Lisa	Mother	mot	0	1	0
158	20130915	06:50	00:01:12	Lois	Infant	3	NA	NA	M	D-M	Partial	1	1	0	00:55	01:04	NA	0	9	12	1.333333333	right	body	1	?	R	M	1	1	Lisa	Mother	mot	1	0	0
160	20130915	07:08	00:01:55	Lois	Infant	3	NA	NA	M	D-M	Partial	1	1	0	01:07	01:17	NA	0	10	12	1.2	right	limbs	1	F-Ins	F-Ins	F-Ins	0	1	Lisa	Mother	mot	NA	NA	NA
161	20130915	07:10	00:01:19	Lois	Infant	3	NA	NA	M	D-M	Partial	1	1	0	00:39	00:51	NA	0	12	14	1.166666667	right	limbs	1	F-Ins	F-Ins	F-Ins	0	1	Lisa	Mother	mot	NA	NA	NA
164	20130915	07:19	00:01:54	Lois	Infant	3	NA	NA	M	D-M	Partial	1	1	0	00:23	00:28	NA	0	5	5	1	right	switch	1	F-Ins	F-Ins	F-Ins	0	1	Lisa	Mother	mot	0	NA	0
175	20130915	08:45	00:01:52	Lois	Infant	3	NA	NA	M	D-M	Partial	8	1	1	0:00*	00:02	NA	0	2	3	1.5	right	head	0	R?	GS	GS	0	1	Lisa	Mother	mot	NA	NA	NA
175	20130915	08:45	00:01:52	Lois	Infant	3	NA	NA	M	D-M	Partial	8	2	1	00:02	00:12	00:00	0	10	14	1.4	right	head	0	GS	GS	GS	0	1	Lisa	Mother	mot	NA	NA	NA
175	20130915	08:45	00:01:52	Lois	Infant	3	NA	NA	M	D-M	Partial	8	3	1	00:12	00:18	00:00	0	6	7	1.166666667	right	head	0	GS	GS	GS	0	1	Lisa	Mother	mot	NA	NA	NA
175	20130915	08:45	00:01:52	Lois	Infant	3	NA	NA	M	D-M	Partial	8	4	1	00:20	00:26	00:02	1	6	8	1.333333333	right	head	0	GS	GS	GS	0	1	Lisa	Mother	mot	NA	NA	NA
175	20130915	08:45	00:01:52	Lois	Infant	3	NA	NA	M	D-M	Partial	8	5	1	00:40	00:50	00:14	1	10	10	1	right	head	0	GS	GS	GS	0	1	Lisa	Mother	mot	NA	NA	NA
175	20130915	08:45	00:01:52	Lois	Infant	3	NA	NA	M	D-M	Partial	8	6	1	00:56	1:00*	00:06	NA	4	5	1.25	right	head	0	GS	GS	GS	0	1	Lisa	Mother	mot	NA	NA	NA
175	20130915	08:45	00:01:52	Lois	Infant	3	NA	NA	M	D-M	Partial	8	7	1	01:01	01:03	00:01	0	2	3	1.5	right	head	0	GS	GS	GS	0	1	Lisa	Mother	mot	NA	NA	NA
175	20130915	08:45	00:01:52	Lois	Infant	3	NA	NA	M	D-M	Partial	8	8	1	01:19	01:45	00:16	1	26	37	1.423076923	right	head	0	GS	GS	M	1	1	Lisa	Mother	mot	NA	NA	NA
181	20130915	09:33	00:05:56	Lisa	Mother	NA	36	2	F	A-F	Partial	3	1	1	03:42	03:57	NA	0	15	24	1.6	right	head	0	R	R	M*	1	1	Lois	Infant	off	0	NA	0
181	20130915	09:33	00:05:56	Lisa	Mother	NA	36	2	F	A-F	Partial	3	2	1	05:26	05:36	01:29	0	10	12	1.2	right	body	1	M	R	R	0	1	Lois	Infant	off	0	NA	0
181	20130915	09:33	00:05:56	Lisa	Mother	NA	36	2	F	A-F	Partial	3	3	1	05:36	05:46	00:00	0	10	10	1	right	body	1	R	R	?	NA	1	Lois	Infant	off	0	NA	0
182	20130915	09:57	00:01:43	Lisa	Mother	NA	36	2	F	A-F	Partial	3	1	1	0:00*	0:00*	NA	NA	NA	NA	NA	NA	NA	NA	?	?	?	NA	1	Lois	Infant	off	NA	NA	NA
182	20130915	09:57	00:01:43	Lisa	Mother	NA	36	2	F	A-F	Partial	3	2	1	00:28	00:30	01:00	0	2	2	1	left	limbs	1	F-Ins?	R	R	0	1	Lois	Infant	off	0	1	0
182	20130915	09:57	00:01:43	Lisa	Mother	NA	36	2	F	A-F	Partial	3	3	1	01:04	01:11	00:34	0	7	8	1.142857143	left	head	0	R	R	M*	1	1	Lois	Infant	off	1	NA	0
184	20130915	10:39	00:01:52	Lois	Infant	3	NA	NA	M	D-M	Partial	1	1	0	00:21	00:41	NA	0	20	24	1.2	right	head	0	R	R	R	0	1	Lisa	Mother	mot	NA	NA	NA
185	20130915	10:43	00:01:57	Lois	Infant	3	NA	NA	M	D-M	Partial	2	1	1	00:57	00:59	NA	0	1.5	1	0.666666667	right	head	0	F-Ins?	F-Ins?	F-Ins?	0	1	Lisa	Mother	mot	NA	NA	NA
185	20130915	10:43	00:01:57	Lois	Infant	3	NA	NA	M	D-M	Partial	2	2	1	01:04	01:05	00:05	1	1.5	2	1.333333333	left	head	0	F-Ins?	F-Ins?	F-Ins?	0	1	Lisa	Mother	mot	NA	NA	NA
186	20130915	11:11	00:00:25	Lisa	Mother	NA	36	2	F	A-F	Partial	2	1	1	0:00*	00:05	NA	0	5	5	1	right	limbs	1	?	Bridge	Bridge	1	1	Lois	Infant	off	1	NA	NA
186	20130915	11:11	00:00:25	Lisa	Mother	NA	36	2	F	A-F	Partial	2	2	1	00:05	00:14	00:00	0	9	10	1.111111111	right	body	1	Bridge	Bridge	M	1	1	Lois	Infant	off	1	NA	NA
188	20130915	11:24	00:00:47	Lois	Infant	3	NA	NA	M	D-M	Partial	1	1	0	0:00*	00:02	NA	0	2	2	1	left	limbs	1	?	?	?	NA	1	Lisa	Mother	mot	1	0	0
188	20130915	11:24	00:00:47	Lisa	Mother	NA	36	2	F	A-F	Partial	1	1	0	00:10	00:19	NA	0	9	12	1.333333333	NA	NA	NA	R?	R?	M	1	1	Lois	Infant	off	0	1	1
191	20130915	12:21	00:01:32	Lois	Infant	3	NA	NA	M	D-M	Partial	1	1	0	01:27	01:29	NA	0	1.5	2	1.333333333	right	head	0	F-Ins?	F-Ins?	M	1	1	Lisa	Mother	mot	0	0	0
192	20130915	15:27	00:01:03	Lisa	Mother	NA	36	2	F	A-F	Partial	1	1	0	00:40	00:42	NA	0	2.5	4	1.6	left	head	0	F-Ins	F-Ins	F-Ins?	0	1	Lois	Infant	off	0	NA	0
196	20130915	15:50	00:02:21	Lisa	Mother	NA	36	2	F	A-F	Partial	1	1	0	01:01	01:08	NA	0	7	10	1.428571429	right	limbs	1	F-Ins	F-Ins	F-Ins	0	1	Lois	Infant	off	1	1	0
197	20130915	16:06	00:02:47	Lois	Infant	3	NA	NA	M	D-M	Partial	2	1	1	01:00	01:05	NA	0	5	5	1	right	head	0	M	R	F-Ins?	0	1	Lisa	Mother	mot	1	1	0
197	20130915	16:06	00:02:47	Lois	Infant	3	NA	NA	M	D-M	Partial	2	2	1	01:52	01:54	00:47	0	2	2	1	left	body	1	F-Ins	F-Ins	F-Ins	0	1	Lisa	Mother	mot	0	1	0
MAH00461	20131007	06:35	00:00:34	Ulysses	Unflanged	NA	NA	NA	M	A-M	Full	1	1	0	0:00*	0:00*	NA	NA	7	7	1	left	body	1	F-Ins	R	F-Ins	0	0	NA	NA	NA	NA	NA	NA
MAH00462	20131007	06:41	00:02:23	Ulysses	Unflanged	NA	NA	NA	M	A-M	Full	2	1	1	01:06	01:08	NA	0	2	3	1.5	left	head	0	F-Ins	F-Ins	F-Ins	0	0	NA	NA	NA	NA	NA	NA
MAH00462	20131007	06:41	00:02:23	Ulysses	Unflanged	NA	NA	NA	M	A-M	Full	2	2	1	01:32	01:35	00:24	1	3	4	1.333333333	left	body	1	F-Ins	F-Ins	F-Ins	0	0	NA	NA	NA	NA	NA	NA
MAH00463	20131007	06:45	00:01:03	Ulysses	Unflanged	NA	NA	NA	M	A-M	Full	1	1	0	00:21	00:22	NA	0	1	1	1	right	head	0	F-Ins	F-Ins	F-Ins	0	0	NA	NA	NA	NA	NA	NA
MAH00466	20131007	07:42	00:01:23	Frankie	Infant	1	NA	NA	M	D-M	Partial	2	1	1	00:49	00:53	NA	0	4	5	1.25	right	body	1	M	R	R	0	1	Friska	Mother	mot	0	0	0
MAH00466	20131007	07:42	00:01:23	Frankie	Infant	1	NA	NA	M	D-M	Partial	2	2	1	00:53	00:56	00:00	0	3	3	1	right	limbs	1	R	R	M*	1	1	Friska	Mother	mot	0	0	0
MAH00467	20131007	07:45	00:01:23	Frankie	Infant	1	NA	NA	M	D-M	Partial	2	1	1	00:29	00:33	NA	0	4	5	1.25	right	NA	NA	APO	F-Ins	F-Ins	0	1	Friska	Mother	mot	1	0	0
MAH00467	20131007	07:45	00:01:23	Frankie	Infant	1	NA	NA	M	D-M	Partial	2	2	1	01:16	01:22	00:43	0	6	6	1	right	body	1	M	F-Ins	F-Ins	0	1	Friska	Mother	mot	1	0	0
MAH00471	20131007	07:59	00:00:31	Ulysses	Unflanged	NA	NA	NA	M	A-M	Full	2	1	1	0:00*	0:00*	NA	NA	1	2	2	left	head	0	F-Ins	F-Ins	F-Ins	0	1	Friska+Frankie	None	oth	NA	NA	NA
MAH00471	20131007	07:59	00:00:31	Ulysses	Unflanged	NA	NA	NA	M	A-M	Full	2	2	1	00:04	00:04	00:05	1	1	1	1	left	head	0	F-Ins	F-Ins	F-Ins	0	1	Friska+Frankie	None	oth	NA	NA	NA
MAH00476	20131007	09:33	00:00:46	Ulysses	Unflanged	NA	NA	NA	M	A-M	Full	1	1	0	00:22	00:24	NA	0	2	3	1.5	left	head	0	F-Ins	F-Ins	F-Ins	0	0	NA	NA	NA	NA	NA	NA
MAH00478	20131007	10:14	00:03:31	Ulysses	Unflanged	NA	NA	NA	M	A-M	Full	8	1	1	00:26	00:28	NA	0	2	2	1	right	head	0	F-Ins	M	F-Ins	0	0	NA	NA	NA	NA	NA	NA
MAH00478	20131007	10:14	00:03:31	Ulysses	Unflanged	NA	NA	NA	M	A-M	Full	8	2	1	00:40	00:40	00:12	1	1	1	1	right	limbs	1	F-Ins	F-Ins	F-Ins	0	0	NA	NA	NA	NA	NA	NA
MAH00478	20131007	10:14	00:03:31	Ulysses	Unflanged	NA	NA	NA	M	A-M	Full	8	3	1	00:42	00:43	00:02	1	1.5	2	1.333333333	right	limbs	1	F-Ins	F-Ins	F-Ins	0	0	NA	NA	NA	NA	NA	NA
MAH00478	20131007	10:14	00:03:31	Ulysses	Unflanged	NA	NA	NA	M	A-M	Full	8	4	1	01:03	01:04	00:20	1	1.5	2	1.333333333	right	head	0	F-Ins	F-Ins	F-Ins	0	0	NA	NA	NA	NA	NA	NA
MAH00478	20131007	10:14	00:03:31	Ulysses	Unflanged	NA	NA	NA	M	A-M	Full	8	5	1	01:05	01:06	00:01	0	1	1	1	right	head	0	F-Ins	F-Ins	F-Ins	0	0	NA	NA	NA	NA	NA	NA
MAH00478	20131007	10:14	00:03:31	Ulysses	Unflanged	NA	NA	NA	M	A-M	Full	8	6	1	01:22	01:22	00:16	1	1	1	1	right	head	0	F-Ins	F-Ins	F-Ins	0	0	NA	NA	NA	NA	NA	NA
MAH00478	20131007	10:14	00:03:31	Ulysses	Unflanged	NA	NA	NA	M	A-M	Full	8	7	1	02:21	02:21	00:59	0	1	1	1	right	head	0	F-Ins	F-Ins	F-Ins	0	0	NA	NA	NA	NA	NA	NA
MAH00478	20131007	10:14	00:03:31	Ulysses	Unflanged	NA	NA	NA	M	A-M	Full	8	8	1	02:47	02:47	00:26	1	1	1	1	right	limbs	1	F-Ins	F-Ins	F-Ins	0	0	NA	NA	NA	NA	NA	NA
MAH00482	20131007	10:22	00:00:38	Ulysses	Unflanged	NA	NA	NA	M	A-M	Full	1	1	0	0:00*	0:00*	NA	NA	1.5	2	1.333333333	left	head	0	F-Ins?	F-Ins	M	1	0	NA	NA	NA	NA	NA	NA
MAH00483	20131007	10:43	00:00:33	Ulysses	Unflanged	NA	NA	NA	M	A-M	Full	2	1	1	0:00*	0:00*	NA	NA	1.5	2	1.333333333	right	head	0	F-Ins?	F-Ins?	F-Ins	0	0	NA	NA	NA	NA	NA	NA
MAH00483	20131007	10:43	00:00:33	Ulysses	Unflanged	NA	NA	NA	M	A-M	Full	2	2	1	00:02	00:06	00:05	1	4	5	1.25	right	head	0	F-Ins	F-Ins	F-Ins	0	0	NA	NA	NA	NA	NA	NA
MAH00484	20131007	10:52	00:02:02	Ulysses	Unflanged	NA	NA	NA	M	A-M	Full	3	1	1	00:15	00:17	NA	0	2	3	1.5	left	limbs	1	F-Ins	F-Ins	F-Ins	0	0	NA	NA	NA	NA	NA	NA
MAH00484	20131007	10:52	00:02:02	Ulysses	Unflanged	NA	NA	NA	M	A-M	Full	3	2	1	00:58	01:00	00:41	0	2	3	1.5	left	limbs	1	F-Ins	F-Ins	F-Ins	0	0	NA	NA	NA	NA	NA	NA
MAH00484	20131007	10:52	00:02:02	Ulysses	Unflanged	NA	NA	NA	M	A-M	Full	3	3	1	01:02	01:02	00:02	1	1	1	1	left	head	0	F-Ins	F-Ins	F-Ins	0	0	NA	NA	NA	NA	NA	NA
MAH00485	20131007	11:00	00:00:46	Ulysses	Unflanged	NA	NA	NA	M	A-M	Full	1	1	0	00:11	00:13	NA	0	2	3	1.5	left	body	1	R	R	M*	1	0	NA	NA	NA	NA	NA	NA
MAH00486	20131007	11:01	00:00:30	Ulysses	Unflanged	NA	NA	NA	M	A-M	Full	4	1	1	0:00*	0:00*	NA	NA	1	1	1	left	head	0	F-Ins	R	R	0	0	NA	NA	NA	NA	NA	NA
MAH00486	20131007	11:01	00:00:30	Ulysses	Unflanged	NA	NA	NA	M	A-M	Full	4	2	1	00:01	00:01	00:02	1	1	1	1	left	head	0	R	R	R	0	0	NA	NA	NA	NA	NA	NA
MAH00486	20131007	11:01	00:00:30	Ulysses	Unflanged	NA	NA	NA	M	A-M	Full	4	3	1	00:02	00:02	00:01	0	1	1	1	left	head	0	R	M	M	1	0	NA	NA	NA	NA	NA	NA
MAH00486	20131007	11:01	00:00:30	Ulysses	Unflanged	NA	NA	NA	M	A-M	Full	4	4	1	00:09	00:09	00:07	1	1	1	1	right	head	0	M	F-Ins	F-Ins	0	0	NA	NA	NA	NA	NA	NA
MAH00487	20131007	11:02	00:00:59	Ulysses	Unflanged	NA	NA	NA	M	A-M	Full	4	1	1	0:00*	00:05	NA	0	6	7	1.166666667	right	limbs	1	F-Ins	Bridge	M*	1	0	NA	NA	NA	NA	NA	NA
MAH00487	20131007	11:02	00:00:59	Ulysses	Unflanged	NA	NA	NA	M	A-M	Full	4	2	1	00:24	00:33	00:19	1	9	10	1.111111111	left	body	1	M*	Bridge	Bridge	1	0	NA	NA	NA	NA	NA	NA
MAH00487	20131007	11:02	00:00:59	Ulysses	Unflanged	NA	NA	NA	M	A-M	Full	4	3	1	00:38	00:40	00:05	1	2	2	1	left	head	0	Bridge	Bridge	Bridge	1	0	NA	NA	NA	NA	NA	NA
MAH00487	20131007	11:02	00:00:59	Ulysses	Unflanged	NA	NA	NA	M	A-M	Full	4	4	1	00:42	00:42	00:02	1	1	1	1	left	limbs	1	Bridge	Bridge	M	1	0	NA	NA	NA	NA	NA	NA
MAH00488	20131007	11:12	00:02:15	Ulysses	Unflanged	NA	NA	NA	M	A-M	Full	2	1	1	0:00*	00:02	NA	0	9	10	1.111111111	left	limbs	1	F-Ins	R	F-Ins	0	0	NA	NA	NA	NA	NA	NA
MAH00488	20131007	11:12	00:02:15	Ulysses	Unflanged	NA	NA	NA	M	A-M	Full	2	2	1	01:24	01:25	01:22	0	1	1	1	left	limbs	1	F-Ins	R	R	0	0	NA	NA	NA	NA	NA	NA
MAH00489	20131007	11:16	00:00:51	Ulysses	Unflanged	NA	NA	NA	M	A-M	Full	3	1	1	0:00*	00:01	NA	0	1.5	2	1.333333333	right	body	1	F-Ins	R	R	0	0	NA	NA	NA	NA	NA	NA
MAH00489	20131007	11:16	00:00:51	Ulysses	Unflanged	NA	NA	NA	M	A-M	Full	3	2	1	00:09	00:13	00:08	1	4	5	1.25	right	limbs	1	R	R	R	0	0	NA	NA	NA	NA	NA	NA
MAH00489	20131007	11:16	00:00:51	Ulysses	Unflanged	NA	NA	NA	M	A-M	Full	3	3	1	00:14	00:15	00:01	0	1.5	2	1.333333333	right	head	0	R	R	F-Ins	0	0	NA	NA	NA	NA	NA	NA
MAH00493	20131007	11:22	00:01:36	Ulysses	Unflanged	NA	NA	NA	M	A-M	Full	3	1	1	0:00*	0:00*	NA	NA	1	1	1	right	body	1	F-Ins	R	R	0	0	NA	NA	NA	NA	NA	NA
MAH00493	20131007	11:22	00:01:36	Ulysses	Unflanged	NA	NA	NA	M	A-M	Full	3	2	1	00:36	00:38	00:40	0	1.5	3	2	left	body	1	R	R	F-Ins	0	0	NA	NA	NA	NA	NA	NA
MAH00493	20131007	11:22	00:01:36	Ulysses	Unflanged	NA	NA	NA	M	A-M	Full	3	3	1	00:59	01:01	00:21	1	2	1	0.5	left	body	1	F-Ins	R	R	0	0	NA	NA	NA	NA	NA	NA
MAH00496	20131007	11:29	00:01:23	Fredy	Juvenile	8	NA	NA	M	D-M	Partial	1	1	0	00:23	00:23	NA	0	1	1	1	left	head	0	R	R	R	0	1	Ulysses	None	oth	1	0	0
MAH00501	20131007	12:56	00:00:54	Ulysses	Unflanged	NA	NA	NA	M	A-M	Full	2	1	1	0:00*	0:00*	NA	NA	NA	1	NA	right	head	0	F-Ins	R	R	0	0	NA	NA	NA	NA	NA	NA
MAH00501	20131007	12:56	00:00:54	Ulysses	Unflanged	NA	NA	NA	M	A-M	Full	2	2	1	00:01	00:01	00:02	1	1	1	1	right	switch	1	R	R	F-Ins	0	0	NA	NA	NA	NA	NA	NA
MAH00502	20131007	13:19	00:01:03	Ulysses	Unflanged	NA	NA	NA	M	A-M	Full	1	1	0	0:00*	00:01	NA	0	NA	4	NA	right	head	0	R	R	R	0	0	NA	NA	NA	NA	NA	NA
MAH00506	20131007	14:31	00:06:06	Ulysses	Unflanged	NA	NA	NA	M	A-M	Full	16	1	1	0:00*	0:00*	NA	NA	NA	2	NA	right	head	0	F-Ins	F-Ins	F-Ins	0	0	NA	NA	NA	NA	NA	NA
MAH00506	20131007	14:31	00:06:06	Ulysses	Unflanged	NA	NA	NA	M	A-M	Full	16	2	1	00:17	00:17	00:18	1	1	1	1	right	limbs	1	F-Ins	F-Ins	F-Ins	0	0	NA	NA	NA	NA	NA	NA
MAH00506	20131007	14:31	00:06:06	Ulysses	Unflanged	NA	NA	NA	M	A-M	Full	16	3	1	00:30	00:31	00:13	1	1.5	2	1.333333333	right	body	1	F-Ins	F-Ins	F-Ins	0	0	NA	NA	NA	NA	NA	NA
MAH00506	20131007	14:31	00:06:06	Ulysses	Unflanged	NA	NA	NA	M	A-M	Full	16	4	1	00:53	00:53	00:22	1	1	1	1	right	head	0	F-Ins	F-Ins	F-Ins	0	0	NA	NA	NA	NA	NA	NA
MAH00506	20131007	14:31	00:06:06	Ulysses	Unflanged	NA	NA	NA	M	A-M	Full	16	5	1	00:55	00:55	00:02	1	1	1	1	right	head	0	F-Ins	F-Ins	F-Ins	0	0	NA	NA	NA	NA	NA	NA
MAH00506	20131007	14:31	00:06:06	Ulysses	Unflanged	NA	NA	NA	M	A-M	Full	16	6	1	01:39	01:39	00:44	0	1	1	1	right	head	0	F-Ins	F-Ins	F-Ins	0	0	NA	NA	NA	NA	NA	NA
MAH00506	20131007	14:31	00:06:06	Ulysses	Unflanged	NA	NA	NA	M	A-M	Full	16	7	1	01:49	01:49	00:10	1	1	1	1	right	head	0	F-Ins	F-Ins	F-Ins	0	0	NA	NA	NA	NA	NA	NA
MAH00506	20131007	14:31	00:06:06	Ulysses	Unflanged	NA	NA	NA	M	A-M	Full	16	8	1	02:29	02:30	00:40	0	1	2	2	right	head	0	F-Ins	F-Ins	F-Ins	0	0	NA	NA	NA	NA	NA	NA
MAH00506	20131007	14:31	00:06:06	Ulysses	Unflanged	NA	NA	NA	M	A-M	Full	16	9	1	02:37	02:39	00:07	1	2	2	1	right	limbs	1	F-Ins	F-Ins	F-Ins	0	0	NA	NA	NA	NA	NA	NA
MAH00506	20131007	14:31	00:06:06	Ulysses	Unflanged	NA	NA	NA	M	A-M	Full	16	10	1	03:12	03:12	00:33	0	1	1	1	right	head	0	F-Ins	F-Ins	F-Ins	0	0	NA	NA	NA	NA	NA	NA
MAH00506	20131007	14:31	00:06:06	Ulysses	Unflanged	NA	NA	NA	M	A-M	Full	16	11	1	03:16	03:16	00:04	1	1	1	1	right	limbs	1	F-Ins	F-Ins	F-Ins	0	0	NA	NA	NA	NA	NA	NA
MAH00506	20131007	14:31	00:06:06	Ulysses	Unflanged	NA	NA	NA	M	A-M	Full	16	12	1	03:24	03:24	00:08	1	1	1	1	right	limbs	1	F-Ins	F-Ins	F-Ins	0	0	NA	NA	NA	NA	NA	NA
MAH00506	20131007	14:31	00:06:06	Ulysses	Unflanged	NA	NA	NA	M	A-M	Full	16	13	1	03:32	03:35	00:08	1	3	4	1.333333333	right	limbs	1	F-Ins	F-Ins	F-Ins	0	0	NA	NA	NA	NA	NA	NA
MAH00506	20131007	14:31	00:06:06	Ulysses	Unflanged	NA	NA	NA	M	A-M	Full	16	14	1	04:08	04:09	00:33	0	1.5	2	1.333333333	left	limbs	1	F-Ins	F-Ins	F-Ins	0	0	NA	NA	NA	NA	NA	NA
MAH00506	20131007	14:31	00:06:06	Ulysses	Unflanged	NA	NA	NA	M	A-M	Full	16	15	1	04:13	04:14	00:04	1	1.5	2	1.333333333	left	limbs	1	F-Ins	F-Ins	M*	1	0	NA	NA	NA	NA	NA	NA
MAH00506	20131007	14:31	00:06:06	Ulysses	Unflanged	NA	NA	NA	M	A-M	Full	16	16	1	04:42	04:42	00:28	1	1	1	1	left	head	0	M	R	F-Ins	0	0	NA	NA	NA	NA	NA	NA
MAH00507	20131007	14:43	00:01:16	Ulysses	Unflanged	NA	NA	NA	M	A-M	Full	3	1	1	00:00	00:03	NA	0	3	3	1	left	head	0	F-Ins	F-Ins	F-Ins	0	0	NA	NA	NA	NA	NA	NA
MAH00507	20131007	14:43	00:01:16	Ulysses	Unflanged	NA	NA	NA	M	A-M	Full	3	2	1	00:05	00:05	00:02	1	1	1	1	left	limbs	1	F-Ins	F-Ins	F-Ins	0	0	NA	NA	NA	NA	NA	NA
MAH00507	20131007	14:43	00:01:16	Ulysses	Unflanged	NA	NA	NA	M	A-M	Full	3	3	1	00:43	00:43	00:38	0	1	1	1	left	limbs	1	F-Ins	F-Ins	F-Ins	0	0	NA	NA	NA	NA	NA	NA
MAH00508	20131007	14:44	00:00:20	Ulysses	Unflanged	NA	NA	NA	M	A-M	Full	1	1	0	00:00	00:01	NA	0	1	1	1	right	body	1	F-Ins	F-Ins	F-Ins	0	0	NA	NA	NA	NA	NA	NA
MAH00509	20131007	14:51	00:01:00	Ulysses	Unflanged	NA	NA	NA	M	A-M	Full	5	1	1	00:09	00:10	NA	0	1	2	2	left	head	0	F-Ins	R	R	0	0	NA	NA	NA	NA	NA	NA
MAH00509	20131007	14:51	00:01:00	Ulysses	Unflanged	NA	NA	NA	M	A-M	Full	5	2	1	00:11	00:15	00:01	0	4	2	0.5	left	limbs	1	R	R	R	0	0	NA	NA	NA	NA	NA	NA
MAH00509	20131007	14:51	00:01:00	Ulysses	Unflanged	NA	NA	NA	M	A-M	Full	5	3	1	00:20	00:22	00:05	1	2	1	0.5	left	limbs	1	R	R	R	0	0	NA	NA	NA	NA	NA	NA
MAH00509	20131007	14:51	00:01:00	Ulysses	Unflanged	NA	NA	NA	M	A-M	Full	5	4	1	00:25	00:25	00:03	1	1	1	1	left	limbs	1	R	R	F-Ins	0	0	NA	NA	NA	NA	NA	NA
MAH00509	20131007	14:51	00:01:00	Ulysses	Unflanged	NA	NA	NA	M	A-M	Full	5	5	1	00:47	00:47	00:22	1	1	1	1	left	limbs	1	F-Ins	R	F-Ins	0	0	NA	NA	NA	NA	NA	NA
MAH00510	20131007	14:55	00:00:50	Ulysses	Unflanged	NA	NA	NA	M	A-M	Full	4	1	1	0:00*	0:00*	NA	NA	1	1	1	right	head	1	F-Ins	R	R	0	0	NA	NA	NA	NA	NA	NA
MAH00510	20131007	14:55	00:00:50	Ulysses	Unflanged	NA	NA	NA	M	A-M	Full	4	2	1	00:01	00:01	00:01	0	1	1	1	right	head	0	R	R	F-Ins	0	0	NA	NA	NA	NA	NA	NA
MAH00510	20131007	14:55	00:00:50	Ulysses	Unflanged	NA	NA	NA	M	A-M	Full	4	3	1	00:15	00:15	00:14	1	1	1	1	right	head	0	F-Ins	F-Ins	F-Ins	0	0	NA	NA	NA	NA	NA	NA
MAH00510	20131007	14:55	00:00:50	Ulysses	Unflanged	NA	NA	NA	M	A-M	Full	4	4	1	00:19	00:20	00:04	1	1	2	2	right	head	0	F-Ins	R	F-Ins	0	0	NA	NA	NA	NA	NA	NA
MAH00511	20131007	14:57	00:01:00	Ulysses	Unflanged	NA	NA	NA	M	A-M	Full	2	1	1	0:00*	0:00*	NA	NA	NA	2	NA	left	body	1	?	R	R	0	0	NA	NA	NA	NA	NA	NA
MAH00511	20131007	14:57	00:01:00	Ulysses	Unflanged	NA	NA	NA	M	A-M	Full	2	2	1	00:03	00:03	00:04	1	1	1	1	left	head	0	R	R	F	0	0	NA	NA	NA	NA	NA	NA
MAH00523	20131007	15:58	00:01:11	Ulysses	Unflanged	NA	NA	NA	M	A-M	Full	1	1	0	0:00*	00:07	NA	0	7	8	1.142857143	right	body	1	F	R	F	0	0	NA	NA	NA	NA	NA	NA
MAH00528	20131007	16:38	00:01:09	Ulysses	Unflanged	NA	NA	NA	M	A-M	Full	1	1	0	00:37	00:37	NA	0	1	1	1	left	head	0	F-Ins	F-Ins	F-Ins	0	0	NA	NA	NA	NA	NA	NA
MAH00529	20131007	16:42	00:03:38	Ulysses	Unflanged	NA	NA	NA	M	A-M	Full	2	1	1	00:51	00:51	NA	0	1	1	1	right	body	1	F-Ins	F-Ins	F-Ins	0	0	NA	NA	NA	NA	NA	NA
MAH00529	20131007	16:42	00:03:38	Ulysses	Unflanged	NA	NA	NA	M	A-M	Full	2	2	1	01:36	01:37	00:45	0	1	2	2	left	switch	1	F-Ins	F-Ins	F-Ins	0	0	NA	NA	NA	NA	NA	NA
MAH00531	20131007	16:53	00:06:08	Ulysses	Unflanged	NA	NA	NA	M	A-M	Full	1	1	0	05:57	05:57	NA	0	1	1	1	left	head	0	F-Ins	F-Ins	F-Ins	0	0	NA	NA	NA	NA	NA	NA
209	20130919	09:13	00:00:33	Fredy	Juvenile	8	NA	NA	M	D-M	Partial	1	1	0	00:02	00:08	NA	0	6	7	1.166666667	right	body	1	F?	R	M	1	0	NA	NA	NA	NA	NA	NA
211	20130919	09:57	00:02:32	Fredy	Juvenile	8	NA	NA	M	D-M	Partial	1	1	0	00:12	00:39	NA	0	27	30	1.111111111	left	head	0	R	R	R	0	0	NA	NA	NA	NA	NA	NA
212	20130919	10:00	00:00:26	Fredy	Juvenile	8	NA	NA	M	D-M	Partial	1	1	0	00:07	00:07	NA	0	1	1	1	right	head	0	F-Ins	R	F-Ins	0	0	NA	NA	NA	NA	NA	NA
214	20130919	10:09	00:02:14	Fredy	Juvenile	8	NA	NA	M	D-M	Partial	2	1	1	01:20	01:29	NA	0	9	9	1	right	head	0	R	R	R	0	0	NA	NA	NA	NA	NA	NA
214	20130919	10:09	00:02:14	Fredy	Juvenile	8	NA	NA	M	D-M	Partial	2	2	1	01:31	01:39	00:02	1	8	8	1	right	head	0	R	R	R	0	0	NA	NA	NA	NA	NA	NA
215	20130919	10:15	00:01:14	Fredy	Juvenile	8	NA	NA	M	D-M	Partial	1	1	0	00:23	00:25	NA	0	2	2	1	right	limbs	1	F?	Bridge	F?	0	1	Friska+Frankie	Mother+Sibling	mot	0	0	0
216	20130919	10:16	00:00:18	Fredy	Juvenile	8	NA	NA	M	D-M	Partial	1	1	0	0:00*	0:00*	NA	NA	5	5	1	NA	NA	NA	?	?	M	1	1	Friska+Frankie	Mother+Sibling	mot	0	0	0
222	20130919	10:44	00:01:22	Friska	Mother	60	13	6	F	A-F	Full	1	1	0	00:09	00:13	NA	0	4	6	1.5	right	body	1	M	R	M	1	1	Frankie	Infant	off	0	1	1
227	20130919	10:55	00:00:48	Friska	Mother	60	13	6	F	A-F	Full	1	1	0	0:00*	0:00*	NA	NA	5	5	1	NA	NA	NA	R	R	F	0	1	Frankie	Infant	off	NA	1	1
232	20130919	11:13	00:01:52	Friska	Mother	60	13	6	F	A-F	Full	2	1	1	00:55	01:01	NA	0	6	6	1	right	body	1	R	R	R	0	1	Frankie	Infant	off	0	0	0
232	20130919	11:13	00:01:52	Friska	Mother	60	13	6	F	A-F	Full	2	2	1	01:30	01:37	00:29	1	7	7	1	left	limbs	1	M	R	?	NA	1	Frankie	Infant	off	0	1	1
233	20130919	11:15	00:01:10	Friska	Mother	60	13	6	F	A-F	Full	1	1	0	00:03	00:08	NA	0	5	6	1.2	left	body	1	R?	R	M	1	0	Frankie	Infant	off	NA	NA	NA
235	20130919	11:19	00:00:18	Friska	Mother	60	13	6	F	A-F	Full	1	1	0	0:00*	00:07	NA	0	7	7	1	right	switch	1	R?	Bridge	M	1	0	Frankie	Infant	off	NA	NA	NA
242	20130919	11:44	00:01:31	Fredy	Juvenile	8	NA	NA	M	D-M	Partial	1	1	0	01:13	01:20	NA	0	7	9	1.285714286	right	head	0	F	F	F	0	1	Friska+Frankie	Mother+Sibling	mot	0	0	0
246	20130919	11:54	00:03:12	Fredy	Juvenile	8	NA	NA	M	D-M	Partial	1	1	0	01:57	02:00	NA	0	3	3	1	right	head	0	F	F	F	0	1	Friska+Frankie	Mother+Sibling	mot	1	1	0
247	20130919	11:59	00:01:03	Friska	Mother	60	13	6	F	A-F	Full	2	1	1	00:53	00:53	NA	0	1	1	1	left	NA	NA	F	R	F	0	1	Frankie	Infant	off	1	NA	0
247	20130919	11:59	00:01:03	Friska	Mother	60	13	6	F	A-F	Full	2	2	1	00:56	00:56	00:03	1	1	1	1	left	NA	NA	F	R	F	0	1	Frankie	Infant	off	1	NA	0
248	20130919	12:03	00:02:03	Friska	Mother	60	13	6	F	A-F	Full	2	1	1	00:31	00:38	NA	0	7	7	1	left	limbs	1	F	R	F	0	1	Frankie	Infant	off	0	0	0
248	20130919	12:03	00:02:03	Friska	Mother	60	13	6	F	A-F	Full	2	2	1	01:38	01:46	01:00	0	8	9	1.125	right	body	1	M	Bridge	M	1	1	Frankie	Infant	off	1	1	1
251	20130919	12:18	00:02:50	Friska	Mother	60	13	6	F	A-F	Full	5	1	1	00:31	00:43	NA	0	12	14	1.166666667	right	body	1	R	R	R	0	1	Frankie	Infant	off	0	1	1
251	20130919	12:18	00:02:50	Friska	Mother	60	13	6	F	A-F	Full	5	2	1	01:25	01:33	00:42	0	8	9	1.125	left	switch	1	R	R	R	0	1	Frankie	Infant	off	0	0	0
251	20130919	12:18	00:02:50	Friska	Mother	60	13	6	F	A-F	Full	5	3	1	01:33	01:34	00:00	0	1	1	1	left	body	1	R	R	R	0	1	Frankie	Infant	off	0	0	0
251	20130919	12:18	00:02:50	Friska	Mother	60	13	6	F	A-F	Full	5	4	1	01:50	01:54	00:16	1	4	5	1.25	right	body	1	R	R	F?	0	1	Frankie	Infant	off	0	0	0
251	20130919	12:18	00:02:50	Friska	Mother	60	13	6	F	A-F	Full	5	5	1	01:58	02:07	00:04	1	9	11	1.222222222	left	body	1	R	R	F	0	1	Frankie	Infant	off	0	0	0
252	20130919	12:22	00:02:56	Friska	Mother	60	13	6	F	A-F	Full	3	1	1	00:54	01:03	NA	0	9	10	1.111111111	right	switch	1	R	R	R	0	1	Frankie	Infant	off	0	0	0
252	20130919	12:22	00:02:56	Friska	Mother	60	13	6	F	A-F	Full	3	2	1	02:13	02:20	01:10	0	7	7	1	right	switch	1	R	R	M	1	1	Frankie	Infant	off	0	0	0
252	20130919	12:22	00:02:56	Friska	Mother	60	13	6	F	A-F	Full	3	3	1	02:36	02:43	00:16	1	7	7	1	left	NA	NA	Bridge	Bridge	M	1	1	Frankie	Infant	off	0	0	1
255	20130919	12:36	00:01:21	Frankie	Infant	1	NA	NA	M	D-M	Full	1	1	0	00:13	00:18	NA	0	5	5	1	left	body	1	M?	R	M	1	1	Friska	Mother	mot	0	0	0
255	20130919	12:36	00:01:21	Friska	Mother	60	13	6	F	A-F	Full	1	1	0	00:34	00:42	NA	0	8	8	1	right	limbs	1	R	R	M	1	1	Frankie	Infant	off	0	1	0
257	20130919	12:47	00:00:29	Friska	Mother	60	13	6	F	A-F	Full	1	1	0	0:00*	0:00*	NA	NA	3	3	1	NA	NA	NA	R?	R?	M	1	1	Frankie	Infant	off	1	0	0
259	20130919	12:52	00:01:27	Friska	Mother	60	13	6	F	A-F	Full	2	1	1	0:00*	00:08	NA	0	8	8	1	both	body	1	R?	R	M*	1	1	Frankie	Infant	off	0	0	0
259	20130919	12:52	00:01:27	Friska	Mother	60	13	6	F	A-F	Full	2	2	1	01:07	01:13	00:59	0	6	7	1.166666667	left	NA	NA	M	R	M	1	1	Frankie	Infant	off	0	1	0
260	20130919	12:57	00:01:24	Friska	Mother	60	13	6	F	A-F	Full	1	1	0	00:52	00:59	NA	0	7	7	1	right	limbs	1	F	R	F	0	1	Frankie	Infant	off	1	NA	0
261	20130919	13:12	00:00:31	Fredy	Juvenile	8	NA	NA	M	D-M	Partial	1	1	0	0:00*	0:00*	NA	NA	10	NA	NA	NA	NA	NA	M	R?	M	1	1	Friska+Frankie	Mother+Sibling	mot	NA	NA	0
262	20130919	13:19	00:00:15	Fredy	Juvenile	8	NA	NA	M	D-M	Partial	1	1	0	0:00*	00:06	NA	0	6	5	0.833333333	right	head	0	F?	F?	F	0	1	Friska+Frankie	Mother+Sibling	mot	NA	NA	0
263	20130919	13:36	00:01:36	Fredy	Juvenile	8	NA	NA	M	D-M	Partial	3	1	1	0:00*	00:01	NA	0	6	NA	NA	left	body	1	?	R	R	0	1	Friska+Frankie	Mother+Sibling	mot	1	0	0
263	20130919	13:36	00:01:36	Fredy	Juvenile	8	NA	NA	M	D-M	Partial	3	2	1	00:03	00:09	00:02	1	6	8	1.333333333	left	limbs	1	R	R	R	0	1	Friska+Frankie	Mother+Sibling	mot	1	0	0
263	20130919	13:36	00:01:36	Fredy	Juvenile	8	NA	NA	M	D-M	Partial	3	3	1	01:12	01:29	01:03	0	17	16	0.941176471	left	head	0	R	R	R	0	1	Friska+Frankie	Mother+Sibling	mot	1	0	0
264	20130919	13:43	00:02:17	Friska	Mother	60	13	6	F	A-F	Full	1	1	0	01:35	01:42	NA	0	7	8	1.142857143	left	limbs	1	F?	F?	F?	0	1	Frankie	Infant	off	0	1	0
266	20130919	13:47	00:00:16	Fredy	Juvenile	8	NA	NA	M	D-M	Partial	1	1	0	0:00*	00:05	NA	0	5	6	1.2	right	limbs	1	R	R	?	NA	1	Friska+Frankie	Mother+Sibling	mot	NA	NA	0
268	20130919	14:09	00:05:00	Friska	Mother	60	13	6	F	A-F	Full	3	1	1	01:11	01:18	NA	0	7	7	1	right	NA	NA	R	R	R	0	1	Frankie+Fredy	Infant+Offspring	off	0	1	0
268	20130919	14:09	00:05:00	Friska	Mother	60	13	6	F	A-F	Full	3	2	1	02:13	02:18	00:55	0	5	6	1.2	right	body	1	R	R	R	0	1	Frankie+Fredy	Infant+Offspring	off	0	1	0
268	20130919	14:09	00:05:00	Friska	Mother	60	13	6	F	A-F	Full	3	3	1	02:54	02:58	00:36	0	4	4	1	left	NA	NA	R	R	R	0	1	Frankie+Fredy	Infant+Offspring	off	0	1	0
269	20130919	14:11	00:01:05	Friska	Mother	60	13	6	F	A-F	Full	2	1	1	0:00*	0:00*	NA	NA	NA	2	NA	NA	NA	NA	R	R	R	0	1	Frankie+Fredy	Infant+Offspring	off	0	1	0
269	20130919	14:11	00:01:05	Friska	Mother	60	13	6	F	A-F	Full	2	2	1	00:34	00:38	00:35	0	4	4	1	left	head	0	R	R	R	0	1	Frankie+Fredy	Infant+Offspring	off	0	1	0
270	20130919	14:14	00:03:35	Friska	Mother	60	13	6	F	A-F	Full	7	1	1	0:00*	0:00*	NA	NA	5	NA	NA	NA	NA	NA	R	R	R	0	1	Frankie	Infant	off	0	NA	0
270	20130919	14:14	00:03:35	Friska	Mother	60	13	6	F	A-F	Full	7	2	1	00:08	00:14	00:10	1	6	6	1	right	body	1	R	R	R	0	1	Frankie	Infant	off	1	NA	1
270	20130919	14:14	00:03:35	Friska	Mother	60	13	6	F	A-F	Full	7	3	1	00:16	00:16	00:02	1	1	1	1	right	body	1	R	R	R	0	1	Frankie	Infant	off	1	NA	1
270	20130919	14:14	00:03:35	Friska	Mother	60	13	6	F	A-F	Full	7	4	1	00:56	01:04	00:40	0	8	8	1	left	limbs	1	R	R	R	0	1	Frankie	Infant	off	1	NA	1
270	20130919	14:14	00:03:35	Friska	Mother	60	13	6	F	A-F	Full	7	5	1	01:14	01:19	00:10	1	5	6	1.2	right	body	1	R	R	R	0	1	Frankie	Infant	off	0	1	1
270	20130919	14:14	00:03:35	Friska	Mother	60	13	6	F	A-F	Full	7	6	1	02:00	02:01	00:41	0	1.5	2	1.333333333	right	body	1	R	R	R	0	1	Frankie	Infant	off	NA	NA	NA
270	20130919	14:14	00:03:35	Friska	Mother	60	13	6	F	A-F	Full	7	7	1	02:37	02:42	00:36	0	5	6	1.2	right	body	1	R	R	R	0	1	Frankie	Infant	off	0	NA	0
271	20130919	14:22	00:01:55	Friska	Mother	60	13	6	F	A-F	Full	1	1	0	01:18	01:24	NA	0	6	6	1	right	body	1	R	R	R	0	1	Frankie	Infant	off	0	0	0
272	20130919	14:24	00:01:47	Friska	Mother	60	13	6	F	A-F	Full	6	1	1	0:00*	00:05	NA	0	5	5	1	right	limbs	1	R	R	M*	1	1	Frankie	Infant	off	0	0	0
272	20130919	14:24	00:01:47	Friska	Mother	60	13	6	F	A-F	Full	6	2	1	00:10	00:17	00:05	1	7	7	1	left	limbs	1	M*	R	R	0	1	Frankie	Infant	off	0	0	0
272	20130919	14:24	00:01:47	Friska	Mother	60	13	6	F	A-F	Full	6	3	1	00:27	00:31	00:10	1	4	4	1	right	NA	NA	R	R	M*	1	1	Frankie	Infant	off	0	0	0
272	20130919	14:24	00:01:47	Friska	Mother	60	13	6	F	A-F	Full	6	4	1	00:42	00:44	00:11	1	2	3	1.5	left	head	0	M*	R	R	0	1	Frankie	Infant	off	1	NA	0
272	20130919	14:24	00:01:47	Friska	Mother	60	13	6	F	A-F	Full	6	5	1	00:47	00:54	00:03	1	7	7	1	left	switch	1	R	R	R	0	1	Frankie	Infant	off	1	NA	0
272	20130919	14:24	00:01:47	Friska	Mother	60	13	6	F	A-F	Full	6	6	1	01:03	01:06	00:09	1	3	3	1	left	head	0	R	R	M	1	1	Frankie	Infant	off	1	0	0
274	20130919	14:37	00:01:47	Friska	Mother	60	13	6	F	A-F	Full	2	1	1	01:09	01:16	NA	0	7	8	1.142857143	right	switch	1	M	Bridge	M	1	1	Frankie	Infant	off	1	1	1
274	20130919	14:37	00:01:47	Friska	Mother	60	13	6	F	A-F	Full	2	2	1	01:36	01:37	00:20	1	1	2	2	right	head	0	M	M	M	1	0	Frankie	Infant	off	NA	NA	NA
280	20130919	14:51	00:01:41	Friska	Mother	60	13	6	F	A-F	Full	1	1	0	0:00*	0:00*	NA	NA	4	5	1.25	NA	NA	NA	F	F	F	0	1	Frankie	Infant	off	NA	NA	NA
285	20130919	15:08	00:00:30	Frankie	Infant	1	NA	NA	M	D-M	Full	1	1	0	0:00*	00:03	NA	0	3	3	1	left	body	1	F?	R	F	0	1	Friska	Mother	mot	1	1	0
286	20130919	15:11	00:01:01	Frankie	Infant	1	NA	NA	M	D-M	Full	1	1	0	00:46	00:55	NA	0	9	7	0.777777778	right	body	1	F	F	F	0	1	Friska	Mother	mot	0	0	0
291	20130919	15:47	00:00:45	Frankie	Infant	1	NA	NA	M	D-M	Full	6	1	1	0:00*	00:03	NA	0	3	4	1.333333333	left	head	0	?	R	R	0	1	Friska	Mother	mot	0	0	0
291	20130919	15:47	00:00:45	Frankie	Infant	1	NA	NA	M	D-M	Full	6	2	1	00:05	00:09	00:02	1	4	4	1	left	head	0	R	R	R	0	1	Friska	Mother	mot	0	0	0
291	20130919	15:47	00:00:45	Frankie	Infant	1	NA	NA	M	D-M	Full	6	3	1	00:12	00:12	00:03	1	1	1	1	left	head	0	R	R	R	0	1	Friska	Mother	mot	0	0	0
291	20130919	15:47	00:00:45	Frankie	Infant	1	NA	NA	M	D-M	Full	6	4	1	00:14	00:15	00:02	1	1	2	2	left	head	0	R	R	R	0	1	Friska	Mother	mot	0	0	0
291	20130919	15:47	00:00:45	Frankie	Infant	1	NA	NA	M	D-M	Full	6	5	1	00:15	00:17	00:00	0	2	2	1	left	head	0	R	R	R	0	1	Friska	Mother	mot	0	0	0
291	20130919	15:47	00:00:45	Frankie	Infant	1	NA	NA	M	D-M	Full	6	6	1	00:22	00:24	00:05	1	2	2	1	right	head	0	R	R	M	1	1	Friska	Mother	mot	0	0	0
295	20130919	15:54	00:00:45	Frankie	Infant	1	NA	NA	M	D-M	Full	1	1	0	00:02	00:03	NA	0	1	1	1	right	head	0	R	R	R	0	1	Friska	Mother	mot	0	0	0
296	20130919	16:07	00:02:32	Fredy	Juvenile	8	NA	NA	M	D-M	Partial	3	1	1	1:42*	01:48	NA	0	6	7	1.166666667	left	body	1	?	R	R	0	1	Friska+Frankie	Mother+Sibling	mot	1	1	0
296	20130919	16:07	00:02:32	Fredy	Juvenile	8	NA	NA	M	D-M	Partial	3	2	1	01:49	01:56	00:01	0	7	10	1.428571429	left	NA	NA	R	R	R	0	1	Friska+Frankie	Mother+Sibling	mot	1	1	0
296	20130919	16:07	00:02:32	Fredy	Juvenile	8	NA	NA	M	D-M	Partial	3	3	1	02:15	02:17	00:19	1	2	2	1	left	head	0	R	R	R	0	1	Friska+Frankie	Mother+Sibling	mot	1	1	0
297	20130919	16:09	00:01:01	Fredy	Juvenile	8	NA	NA	M	D-M	Partial	1	1	0	0:00*	00:11	NA	0	11	13	1.181818182	left	body	1	R?	R	R?	0	1	Friska+Frankie	NA	NA	1	1	0
305	20130919	17:03	00:00:51	Friska	Mother	60	13	6	F	A-F	Full	1	1	0	00:16	00:23	NA	0	7	8	1.142857143	right	body	1	Bridge	Bridge	M	1	1	Frankie	Infant	off	0	1	1
308	20130919	17:24	00:01:21	Friska	Mother	60	13	6	F	A-F	Full	1	1	0	0:00*	0:00*	NA	NA	1.5	2	1.333333333	NA	NA	NA	F-Ins	M*	R	0	1	Frankie	Infant	off	0	0	1
310	20130919	17:31	00:01:14	Friska	Mother	60	13	6	F	A-F	Full	1	1	0	00:06	00:10	NA	0	4	6	1.5	right	head	0	Bridge	Bridge	M*	1	1	Frankie	Infant	off	0	1	1
311	20130919	17:41	00:00:42	Friska	Mother	60	13	6	F	A-F	Full	1	1	0	00:20	00:25	NA	0	5	5	1	left	body	1	M	Bridge	M	1	1	Frankie	Infant	off	0	1	1
MAH00299	20130928	06:09	00:00:47	Lilly	Adolescent	NA	NA	NA	F	D-F	Full	1	1	0	0:00*	00:08	NA	0	8	9	1.125	left	body	1	F?	R	M*	1	1	Ulysses	None	oth	NA	NA	0
MAH00301	20130928	06:23	00:00:44	Lilly	Adolescent	NA	NA	NA	F	D-F	Full	5	1	1	0:00*	00:05	NA	0	5	7	1.4	right	limbs	1	M	R	R	0	1	Ulysses	None	oth	0	NA	0
MAH00301	20130928	06:23	00:00:44	Lilly	Adolescent	NA	NA	NA	F	D-F	Full	5	2	1	00:05	00:09	00:00	0	4	5	1.25	right	limbs	1	R	R	R	0	1	Ulysses	None	oth	0	NA	0
MAH00301	20130928	06:23	00:00:44	Lilly	Adolescent	NA	NA	NA	F	D-F	Full	5	3	1	00:09	00:11	00:00	0	2	3	1.5	right	body	1	R	R	M	1	1	Ulysses	None	oth	0	NA	0
MAH00301	20130928	06:23	00:00:44	Lilly	Adolescent	NA	NA	NA	F	D-F	Full	5	4	1	00:25	00:32	00:14	1	7	8	1.142857143	left	body	1	M	R	R	0	1	Ulysses	None	oth	0	NA	0
MAH00301	20130928	06:23	00:00:44	Lilly	Adolescent	NA	NA	NA	F	D-F	Full	5	5	1	00:34	00:38	00:02	1	4	7	1.75	right	body	1	R	R	M	1	1	Ulysses	None	oth	0	NA	0
MAH00303	20130928	06:34	00:00:23	Lilly	Adolescent	NA	NA	NA	F	D-F	Full	1	1	0	00:07	00:08	NA	0	1.5	2	1.333333333	right	body	1	M	Bridge	M	1	1	Ulysses	None	oth	0	NA	0
MAH00305	20130928	06:43	00:00:59	Lilly	Adolescent	NA	NA	NA	F	D-F	Full	2	1	1	0:00*	0:00*	NA	NA	1.5	2	1.333333333	left	limbs	1	F	F?	M	1	1	Ulysses	None	oth	NA	NA	0
MAH00305	20130928	06:43	00:00:59	Lilly	Adolescent	NA	NA	NA	F	D-F	Full	2	2	1	00:51	00:53	00:52	0	2	2	1	right	limbs	1	F	R	M	1	1	Ulysses	None	oth	0	NA	0
MAH00306	20130928	06:46	00:02:30	Lilly	Adolescent	NA	NA	NA	F	D-F	Full	1	1	0	00:33	00:38	NA	0	5	6	1.2	right	NA	NA	F	F	M*	1	1	Ulysses	None	oth	0	1	0
MAH00312	20130928	07:09	00:00:15	Lilly	Adolescent	NA	NA	NA	F	D-F	Full	1	1	0	0:00*	0:00*	NA	NA	1.5	3	2	left	limbs	1	F	F	F	0	1	Ulysses	None	oth	0	NA	0
MAH00315	20130928	07:25	00:00:24	Lilly	Adolescent	NA	NA	NA	F	D-F	Full	1	1	0	00:08	00:16	NA	0	8	9	1.125	right	limbs	1	M	R	M	1	1	Ulysses	None	oth	1	NA	0
MAH00316	20130928	07:27	00:00:57	Lilly	Adolescent	NA	NA	NA	F	D-F	Full	1	1	0	00:17	00:35	NA	0	18	25	1.388888889	right	switch	1	M	Bridge	M	1	1	Ulysses	None	oth	0	NA	0
MAH00317	20130928	07:36	00:00:21	Lilly	Adolescent	NA	NA	NA	F	D-F	Full	1	1	0	0:00*	0:00*	NA	NA	1	1	1	left	limbs	1	F-Ins	F-Ins	F-Ins	0	0	NA	NA	NA	NA	NA	NA
MAH00318	20130928	07:37	00:00:16	Lilly	Adolescent	NA	NA	NA	F	D-F	Full	1	1	0	0:00*	00:01	NA	0	2	3	1.5	left	limbs	1	F-Ins	F-Ins	F-Ins	0	0	NA	NA	NA	NA	NA	NA
MAH00323	20130928	08:04	00:00:46	Lilly	Adolescent	NA	NA	NA	F	D-F	Full	1	1	0	0:00*	00:04	NA	0	4	5	1.25	right	head	0	F-Ins?	F-Ins?	M	1	1	Ulysses	None	oth	0	NA	0
MAH00331	20130928	08:45	00:01:08	Lilly	Adolescent	NA	NA	NA	F	D-F	Full	4	1	1	00:00	00:00	NA	0	1	1	1	right	head	0	F-Ins	F-Ins	F-Ins	0	0	NA	NA	NA	NA	NA	NA
MAH00331	20130928	08:45	00:01:08	Lilly	Adolescent	NA	NA	NA	F	D-F	Full	4	2	1	00:00	00:01	00:00	0	1	1	1	right	head	0	F-Ins	F-Ins	F-Ins	0	0	NA	NA	NA	NA	NA	NA
MAH00331	20130928	08:45	00:01:08	Lilly	Adolescent	NA	NA	NA	F	D-F	Full	4	3	1	00:01	00:01	00:00	0	1	1	1	right	head	0	F-Ins	F-Ins	F-Ins	0	0	NA	NA	NA	NA	NA	NA
MAH00331	20130928	08:45	00:01:08	Lilly	Adolescent	NA	NA	NA	F	D-F	Full	4	4	1	00:03	00:03	00:02	1	1	1	1	right	head	0	F-Ins	F-Ins	F-Ins	0	0	NA	NA	NA	NA	NA	NA
MAH00332	20130928	08:52	00:01:50	Lilly	Adolescent	NA	NA	NA	F	D-F	Full	1	1	0	00:41	00:41	NA	0	1	1	1	right	head	0	F-Ins	F-Ins	F-Ins	0	0	NA	NA	NA	NA	NA	NA
MAH00334	20130928	09:08	00:00:13	Lilly	Adolescent	NA	NA	NA	F	D-F	Full	1	1	0	0:00*	0:00*	NA	NA	NA	2	NA	NA	NA	NA	F	R	M	1	0	NA	NA	NA	NA	NA	NA
MAH00335	20130928	09:10	00:00:15	Lilly	Adolescent	NA	NA	NA	F	D-F	Full	1	1	0	0:00*	00:03	NA	0	3	5	1.666666667	left	limbs	1	M	R	M	1	0	NA	NA	NA	NA	NA	NA
MAH00336	20130928	09:25	00:00:33	Lilly	Adolescent	NA	NA	NA	F	D-F	Full	1	1	0	0:00*	00:01	NA	0	NA	NA	NA	right	body	1	M	R	M	1	0	NA	NA	NA	NA	NA	NA
MAH00339	20130928	10:00	00:00:20	Lilly	Adolescent	NA	NA	NA	F	D-F	Full	1	1	0	0:00*	00:06	NA	0	6	9	1.5	right	body	1	M	R	M	1	0	NA	NA	NA	NA	NA	NA
MAH00340	20130928	10:08	00:01:55	Lilly	Adolescent	NA	NA	NA	F	D-F	Full	1	1	0	00:02	00:07	NA	0	5	7	1.4	left	head	0	R	R	R	0	1	Ulysses	None	oth	0	NA	0
MAH00343	20130928	10:18	00:02:13	Lilly	Adolescent	NA	NA	NA	F	D-F	Full	1	1	0	00:31	00:34	NA	0	3	5	1.666666667	right	body	1	M	R	R	0	1	Ulysses	None	oth	0	NA	0
MAH00345	20130928	10:48	00:01:02	Lilly	Adolescent	NA	NA	NA	F	D-F	Full	3	1	1	00:01	00:01	NA	0	1	1	1	left	limbs	1	F-Ins	F-Ins	F-Ins	0	0	NA	NA	NA	NA	NA	NA
MAH00345	20130928	10:48	00:01:02	Lilly	Adolescent	NA	NA	NA	F	D-F	Full	3	2	1	00:33	00:33	00:32	0	1	1	1	left	limbs	1	F-Ins	F-Ins	F-Ins	0	0	NA	NA	NA	NA	NA	NA
MAH00345	20130928	10:48	00:01:02	Lilly	Adolescent	NA	NA	NA	F	D-F	Full	3	3	1	00:48	00:49	00:15	1	1.5	2	1.333333333	left	limbs	1	F-Ins	F-Ins	F-Ins	0	0	NA	NA	NA	NA	NA	NA
MAH00347	20130928	10:52	00:00:30	Lilly	Adolescent	NA	NA	NA	F	D-F	Full	3	1	1	0:00*	00:01	NA	0	1	2	2	right	limbs	1	F-Ins	F-Ins	F-Ins	0	0	NA	NA	NA	NA	NA	NA
MAH00347	20130928	10:52	00:00:30	Lilly	Adolescent	NA	NA	NA	F	D-F	Full	3	2	1	00:02	00:02	00:01	0	1	1	1	right	limbs	1	F-Ins	F-Ins	F-Ins	0	0	NA	NA	NA	NA	NA	NA
MAH00347	20130928	10:52	00:00:30	Lilly	Adolescent	NA	NA	NA	F	D-F	Full	3	3	1	00:04	00:04	00:02	1	1	1	1	right	head	0	F-Ins	F-Ins	F-Ins	0	0	NA	NA	NA	NA	NA	NA
MAH00349	20130928	10:54	00:00:15	Lilly	Adolescent	NA	NA	NA	F	D-F	Full	1	1	0	00:02	00:02	NA	0	1	1	1	right	limbs	1	F-Ins	F-Ins	F-Ins	0	0	NA	NA	NA	NA	NA	NA
MAH00354	20130928	11:04	00:01:00	Lilly	Adolescent	NA	NA	NA	F	D-F	Full	1	1	0	00:28	00:33	NA	0	5	6	1.2	left	limbs	1	F-Ins	R	F-Ins	0	1	Ulysses	None	oth	0	NA	0
MAH00357	20130928	11:22	00:01:13	Lilly	Adolescent	NA	NA	NA	F	D-F	Full	1	1	0	00:28	00:28	NA	0	1	1	1	right	head	0	F-Ins	F-Ins	F-Ins	0	1	Ulysses	None	oth	0	NA	0
MAH00359	20130928	11:28	00:00:31	Lilly	Adolescent	NA	NA	NA	F	D-F	Full	2	1	1	0:00*	00:01	NA	0	2	3	1.5	right	head	0	F	R	M*	1	1	Ulysses	None	oth	0	NA	0
MAH00359	20130928	11:28	00:00:31	Lilly	Adolescent	NA	NA	NA	F	D-F	Full	2	2	1	00:06	00:07	00:05	1	1	2	2	left	body	1	M*	R	M	1	1	Ulysses	None	oth	0	NA	0
MAH00360	20130928	11:35	00:01:05	Lilly	Adolescent	NA	NA	NA	F	D-F	Full	8	1	1	0:00*	0:00*	NA	NA	1.5	2	1.333333333	left	body	1	F	F	M*	1	0	NA	NA	NA	NA	NA	NA
MAH00360	20130928	11:35	00:01:05	Lilly	Adolescent	NA	NA	NA	F	D-F	Full	8	2	1	00:05	00:07	00:05	1	2	3	1.5	right	body	1	M*	F	F	0	0	NA	NA	NA	NA	NA	NA
MAH00360	20130928	11:35	00:01:05	Lilly	Adolescent	NA	NA	NA	F	D-F	Full	8	3	1	00:08	00:10	00:01	0	1.5	2	1.333333333	right	body	1	F	F	F	0	0	NA	NA	NA	NA	NA	NA
MAH00360	20130928	11:35	00:01:05	Lilly	Adolescent	NA	NA	NA	F	D-F	Full	8	4	1	00:14	00:15	00:04	1	1	2	2	right	head	0	F	F	F	0	0	NA	NA	NA	NA	NA	NA
MAH00360	20130928	11:35	00:01:05	Lilly	Adolescent	NA	NA	NA	F	D-F	Full	8	5	1	00:16	00:17	00:01	0	1	1	1	right	limbs	1	F	F	F	0	0	NA	NA	NA	NA	NA	NA
MAH00360	20130928	11:35	00:01:05	Lilly	Adolescent	NA	NA	NA	F	D-F	Full	8	6	1	00:18	00:21	00:01	0	3	3	1	right	limbs	1	F	F	F	0	0	NA	NA	NA	NA	NA	NA
MAH00360	20130928	11:35	00:01:05	Lilly	Adolescent	NA	NA	NA	F	D-F	Full	8	7	1	00:24	00:25	00:03	1	1	1	1	right	limbs	1	F	F	R	0	0	NA	NA	NA	NA	NA	NA
MAH00360	20130928	11:35	00:01:05	Lilly	Adolescent	NA	NA	NA	F	D-F	Full	8	8	1	00:49	00:51	00:24	1	2	2	1	left	limbs	1	M	R	M	1	0	NA	NA	NA	NA	NA	NA
MAH00361	20130928	11:48	00:01:31	Lilly	Adolescent	NA	NA	NA	F	D-F	Full	4	1	1	0:00*	0:00*	NA	NA	2	2	1	left	body	1	F	R	M*	1	0	NA	NA	NA	NA	NA	NA
MAH00361	20130928	11:48	00:01:31	Lilly	Adolescent	NA	NA	NA	F	D-F	Full	4	2	1	00:21	00:22	00:21	1	1.5	2	1.333333333	left	limbs	1	M*	R	R	0	0	NA	NA	NA	NA	NA	NA
MAH00361	20130928	11:48	00:01:31	Lilly	Adolescent	NA	NA	NA	F	D-F	Full	4	3	1	00:23	00:24	00:01	0	1	2	2	left	head	0	R	R	R	0	0	NA	NA	NA	NA	NA	NA
MAH00361	20130928	11:48	00:01:31	Lilly	Adolescent	NA	NA	NA	F	D-F	Full	4	4	1	00:24	00:26	00:00	0	2	3	1.5	left	limbs	1	R	R	M*	1	0	NA	NA	NA	NA	NA	NA
MAH00362	20130928	11:50	00:00:59	Lilly	Adolescent	NA	NA	NA	F	D-F	Full	5	1	1	0:00*	0:00*	NA	NA	1.5	2	1.333333333	right	head	0	F	F	F	0	1	Ulysses	None	oth	0	NA	0
MAH00362	20130928	11:50	00:00:59	Lilly	Adolescent	NA	NA	NA	F	D-F	Full	5	2	1	00:03	00:03	00:04	1	1	1	1	right	head	0	F	F	F	0	1	Ulysses	None	oth	0	NA	0
MAH00362	20130928	11:50	00:00:59	Lilly	Adolescent	NA	NA	NA	F	D-F	Full	5	3	1	00:04	00:06	00:01	0	2	3	1.5	right	body	1	F	F	F	0	1	Ulysses	None	oth	0	NA	0
MAH00362	20130928	11:50	00:00:59	Lilly	Adolescent	NA	NA	NA	F	D-F	Full	5	4	1	00:09	00:13	00:03	1	4	6	1.5	right	body	1	F	F	M*	1	1	Ulysses	None	oth	0	NA	0
MAH00362	20130928	11:50	00:00:59	Lilly	Adolescent	NA	NA	NA	F	D-F	Full	5	5	1	00:31	00:38	00:18	1	7	8	1.142857143	NA	NA	NA	M*	R?	F	0	1	Ulysses	None	oth	0	NA	0
MAH00363	20130928	12:05	00:04:33	Lilly	Adolescent	NA	NA	NA	F	D-F	Full	9	1	1	0:00*	0:00*	NA	NA	4	4	1	right	limbs	1	F	R	M*	1	1	Ulysses	None	oth	0	0	0
MAH00363	20130928	12:05	00:04:33	Lilly	Adolescent	NA	NA	NA	F	D-F	Full	9	2	1	00:18	00:21	00:20	1	3	4	1.333333333	left	limbs	1	F?	R	M*	1	1	Ulysses	None	oth	0	0	0
MAH00363	20130928	12:05	00:04:33	Lilly	Adolescent	NA	NA	NA	F	D-F	Full	9	3	1	00:58	01:02	00:37	0	4	9	2.25	right	head	0	F	F	F	0	1	Ulysses	None	oth	0	0	0
MAH00363	20130928	12:05	00:04:33	Lilly	Adolescent	NA	NA	NA	F	D-F	Full	9	4	1	01:02	01:04	00:00	0	2	2	1	right	limbs	1	F	F	F	0	1	Ulysses	None	oth	0	0	0
MAH00363	20130928	12:05	00:04:33	Lilly	Adolescent	NA	NA	NA	F	D-F	Full	9	5	1	01:08	01:13	00:04	1	5	10	2	right	head	0	F	F	F	0	1	Ulysses	None	oth	0	0	0
MAH00363	20130928	12:05	00:04:33	Lilly	Adolescent	NA	NA	NA	F	D-F	Full	9	6	1	01:13	01:16	00:00	0	3	6	2	right	head	0	F	F	F	0	1	Ulysses	None	oth	0	0	0
MAH00363	20130928	12:05	00:04:33	Lilly	Adolescent	NA	NA	NA	F	D-F	Full	9	7	1	01:25	01:27	00:09	1	2	2	1	right	head	0	F	F	F	0	1	Ulysses	None	oth	0	0	0
MAH00363	20130928	12:05	00:04:33	Lilly	Adolescent	NA	NA	NA	F	D-F	Full	9	8	1	02:45	02:48	01:18	0	3	4	1.333333333	left	body	1	F	F	F	0	1	Ulysses	None	oth	0	0	0
MAH00363	20130928	12:05	00:04:33	Lilly	Adolescent	NA	NA	NA	F	D-F	Full	9	9	1	03:16	03:21	00:28	1	5	6	1.2	left	limbs	1	M*	F	F	0	1	Ulysses	None	oth	0	0	0
MAH00367	20130928	12:14	00:00:31	Lilly	Adolescent	NA	NA	NA	F	D-F	Full	1	1	0	0:00*	00:00	NA	0	2	3	1.5	right	body	1	F	F	M	1	1	Ulysses	None	oth	0	NA	0
MAH00371	20130928	12:19	00:01:29	Lilly	Adolescent	NA	NA	NA	F	D-F	Full	2	1	1	00:22	00:23	NA	0	1.5	2	1.333333333	left	body	1	F	F	F	0	1	Ulysses	None	oth	0	NA	0
MAH00371	20130928	12:19	00:01:29	Lilly	Adolescent	NA	NA	NA	F	D-F	Full	2	2	1	00:43	00:52	00:20	1	9	11	1.222222222	left	body	1	F	F	M	1	1	Ulysses	None	oth	0	NA	0
MAH00373	20130928	12:43	00:00:52	Lilly	Adolescent	NA	NA	NA	F	D-F	Full	1	1	0	0:00*	0:00*	NA	NA	5	NA	NA	left	limbs	1	F	R	F	0	1	Ulysses	None	oth	0	NA	0
MAH00374	20130928	12:50	00:02:18	Lilly	Adolescent	NA	NA	NA	F	D-F	Full	2	1	1	01:46	01:48	NA	0	2	3	1.5	right	limbs	1	F	F	R	0	1	Ulysses	None	oth	0	0	0
MAH00374	20130928	12:50	00:02:18	Lilly	Adolescent	NA	NA	NA	F	D-F	Full	2	2	1	01:56	01:57	00:08	1	1	1	1	right	limbs	1	R	R	M	1	1	Ulysses	None	oth	0	0	0
MAH00377	20130928	13:11	00:00:19	Lilly	Adolescent	NA	NA	NA	F	D-F	Full	1	1	0	0:00*	00:02	NA	0	2	3	1.5	left	limbs	1	R	R	M	1	1	Ulysses	None	oth	0	NA	0
MAH00381	20130928	13:47	00:05:02	Lilly	Adolescent	NA	NA	NA	F	D-F	Full	2	1	1	01:26	01:26	NA	0	1	1	1	left	head	0	F-Ins	F-Ins	F-Ins	0	1	Ulysses	None	oth	0	NA	0
MAH00381	20130928	13:47	00:05:02	Lilly	Adolescent	NA	NA	NA	F	D-F	Full	2	2	1	02:09	02:09	00:43	0	1	1	1	left	body	1	F-Ins	F-Ins	F-Ins	0	1	Ulysses	None	oth	0	NA	0
MAH00382	20130928	13:53	00:05:41	Ulysses	Unflanged	NA	NA	NA	M	A-M	Partial	4	1	1	00:38	00:38	NA	0	1	1	1	left	head	0	F-Ins	F-Ins	F-Ins	0	1	Lilly	None	oth	1	1	0
MAH00382	20130928	13:53	00:05:41	Ulysses	Unflanged	NA	NA	NA	M	A-M	Partial	4	2	1	00:38	00:38	00:00	0	1	1	1	left	limbs	1	F-Ins	F-Ins	F-Ins	0	1	Lilly	None	oth	1	1	0
MAH00382	20130928	13:53	00:05:41	Ulysses	Unflanged	NA	NA	NA	M	A-M	Partial	4	3	1	00:39	00:39	00:01	0	1	1	1	left	head	0	F-Ins	F-Ins	F-Ins	0	1	Lilly	None	oth	1	1	0
MAH00382	20130928	13:53	00:05:41	Ulysses	Unflanged	NA	NA	NA	M	A-M	Partial	4	4	1	02:04	02:05	01:25	0	1	2	2	left	head	0	R?	R	M*	1	1	Lilly	None	oth	0	0	0
MAH00383	20130928	14:05	00:00:30	Lilly	Adolescent	NA	NA	NA	F	D-F	Full	1	1	0	0:00*	00:07	NA	0	7	9	1.285714286	object	limbs	1	R?	R	F	0	1	Ulysses	None	oth	0	NA	0
MAH00390	20130928	14:50	00:00:42	Lilly	Adolescent	NA	NA	NA	F	D-F	Full	3	1	1	0:00*	00:03	NA	0	3	4	1.333333333	left	limbs	1	F?	R	R	0	1	Ulysses	None	oth	0	0	0
MAH00390	20130928	14:50	00:00:42	Lilly	Adolescent	NA	NA	NA	F	D-F	Full	3	2	1	00:06	00:06	00:03	1	1	1	1	right	head	0	R	R	R	0	1	Ulysses	None	oth	1	0	0
MAH00390	20130928	14:50	00:00:42	Lilly	Adolescent	NA	NA	NA	F	D-F	Full	3	3	1	00:11	00:12	00:05	1	1.5	2	1.333333333	right	head	0	R	R	M	1	1	Ulysses	None	oth	0	0	0
MAH00392	20130928	15:01	00:00:17	Lilly	Adolescent	NA	NA	NA	F	D-F	Full	1	1	0	0:00*	00:00	NA	0	3	3	1	object	limbs	1	?	R	M	1	1	Ulysses	None	oth	0	NA	0
MAH00397	20130928	16:59	00:01:35	Lilly	Adolescent	NA	NA	NA	F	D-F	Full	3	1	1	00:02	00:04	NA	0	2	2	1	left	NA	NA	M	R	R	0	0	NA	NA	NA	NA	NA	NA
MAH00397	20130928	16:59	00:01:35	Lilly	Adolescent	NA	NA	NA	F	D-F	Full	3	2	1	00:13	00:28	00:09	1	15	17	1.133333333	right	switch	1	R	R	R	0	0	NA	NA	NA	NA	NA	NA
MAH00397	20130928	16:59	00:01:35	Lilly	Adolescent	NA	NA	NA	F	D-F	Full	3	3	1	00:34	00:44	00:06	1	10	11	1.1	right	limbs	1	R	R	R	0	0	NA	NA	NA	NA	NA	NA
MAH00398	20130928	17:10	00:00:12	Lilly	Adolescent	NA	NA	NA	F	D-F	Full	1	1	0	0:00*	0:00*	NA	NA	4	5	1.25	right	limbs	1	M	R	M	1	0	NA	NA	NA	NA	NA	NA
MAH00402	20130928	17:58	00:03:15	Lilly	Adolescent	NA	NA	NA	F	D-F	Full	1	1	0	02:10	02:13	NA	0	3	3	1	right	limbs	1	F-Ins	F-Ins	F-Ins	0	0	NA	NA	NA	NA	NA	NA
MAH00132	20130921	08:06	00:00:36	Friska	Mother	60	13	6	F	A-F	Partial	1	1	0	0:00*	00:02	NA	0	2	3	1.5	left	limbs	1	F	F	F	0	1	Frankie	Infant	off	0	NA	0
MAH00421	20130930	12:40	00:01:04	Lilly	Adolescent	NA	NA	NA	F	D-F	Partial	4	1	1	0:00*	0:00*	NA	NA	17	20	1.176470588	right	limbs	1	R	R	R	0	1	Ulysses	None	oth	0	0	0
MAH00421	20130930	12:40	00:01:04	Lilly	Adolescent	NA	NA	NA	F	D-F	Partial	4	2	1	0:00*	00:07	00:05	1	7	8	1.142857143	left	body	1	R	R	R	0	1	Ulysses	None	oth	0	0	0
MAH00421	20130930	12:40	00:01:04	Lilly	Adolescent	NA	NA	NA	F	D-F	Partial	4	3	1	00:11	00:12	00:04	1	1.5	2	1.333333333	left	body	1	R	R	R	0	1	Ulysses	None	oth	0	0	0
MAH00421	20130930	12:40	00:01:04	Lilly	Adolescent	NA	NA	NA	F	D-F	Partial	4	4	1	00:50	00:55	00:38	0	5	7	1.4	left	limbs	1	R	R	M	1	1	Ulysses	None	oth	0	0	0
MAH00423	20130930	12:51	00:01:17	Lilly	Adolescent	NA	NA	NA	F	D-F	Partial	1	1	0	00:15	00:18	NA	0	3.5	5	1.428571429	left	head	0	F-Ins	R	F-Ins	0	1	Ulysses	None	oth	0	1	0
MAH00424	20130930	13:17	00:00:32	Lilly	Adolescent	NA	NA	NA	F	D-F	Partial	3	1	1	0:00*	0:00*	NA	NA	NA	4	NA	right	limbs	1	F	R	R	0	1	Ulysses	None	oth	0	NA	0
MAH00424	20130930	13:17	00:00:32	Lilly	Adolescent	NA	NA	NA	F	D-F	Partial	3	2	1	0:00*	0:00*	NA	NA	NA	NA	NA	right	head	0	R	R	F	0	1	Ulysses	None	oth	0	NA	0
MAH00424	20130930	13:17	00:00:32	Lilly	Adolescent	NA	NA	NA	F	D-F	Partial	3	3	1	00:10	00:12	00:11	1	2	3	1.5	right	switch	1	F	R	M	1	1	Ulysses	None	oth	0	1	0
MAH00424	20130930	13:17	00:00:32	Ulysses	Unflanged	NA	NA	NA	M	A-M	Partial	1	1	0	00:16	00:21	NA	0	5	7	1.4	right	head	0	R	R	F?	0	1	Lilly	None	oth	1	0	0
MAH00425	20130930	13:24	00:01:22	Lilly	Adolescent	NA	NA	NA	F	D-F	Partial	1	1	0	0:00*	0:00*	NA	NA	NA	NA	NA	NA	NA	NA	M	R	M*	1	1	Ulysses	None	oth	0	NA	0
MAH00426	20130930	13:28	00:01:39	Lilly	Adolescent	NA	NA	NA	F	D-F	Partial	4	1	1	00:07	00:07	NA	0	1	1	1	right	head	0	F-Ins	F-Ins	F-Ins	0	1	Ulysses	None	oth	0	1	0
MAH00426	20130930	13:28	00:01:39	Lilly	Adolescent	NA	NA	NA	F	D-F	Partial	4	2	1	00:16	00:16	00:09	1	1	1	1	right	head	0	F-Ins	F-Ins	F-Ins	0	1	Ulysses	None	oth	0	1	0
MAH00426	20130930	13:28	00:01:39	Lilly	Adolescent	NA	NA	NA	F	D-F	Partial	4	3	1	00:19	00:19	00:03	1	1	1	1	right	head	0	F-Ins	F-Ins	F-Ins	0	1	Ulysses	None	oth	0	1	0
MAH00426	20130930	13:28	00:01:39	Lilly	Adolescent	NA	NA	NA	F	D-F	Partial	4	4	1	01:01	01:01	00:42	0	1	1	1	right	head	0	F-Ins	F-Ins	F-Ins	0	1	Ulysses	None	oth	0	1	0
MAH00437	20130930	14:40	00:00:30	Ulysses	Unflanged	NA	NA	NA	M	A-M	Partial	1	1	0	00:01	00:03	NA	0	2	3	1.5	right	head	0	M?	Bridge	Bridge	1	1	Lilly+Ulysses	None	oth	1	NA	0
MAH00438	20130930	14:56	00:00:40	Ulysses	Unflanged	NA	NA	NA	M	A-M	Partial	1	1	0	00:28	00:28	NA	0	1	1	1	left	head	0	R	R	R	0	1	Lilly	None	oth	0	0	0
MAH00441	20130930	15:21	00:02:08	Ulysses	Unflanged	NA	NA	NA	M	A-M	Partial	1	1	0	01:40	01:41	NA	0	1	1	1	right	head	0	R	R	R	0	1	Lilly	None	oth	0	0	0
MAH00928	20131025	15:04	00:01:09	Lilly	Adolescent	NA	NA	NA	F	D-F	Partial	1	1	0	00:51	00:54	NA	0	3	4	1.333333333	left	limbs	1	F	F	F	0	1	Raider	None	oth	0	NA	0
MAH00929	20131025	15:11	00:01:00	Lilly	Adolescent	NA	NA	NA	F	D-F	Partial	2	1	1	00:52	00:54	NA	0	2	3	1.5	right	body	1	F	F	F	0	1	Raider	None	oth	0	NA	0
MAH00929	20131025	15:11	00:01:00	Lilly	Adolescent	NA	NA	NA	F	D-F	Partial	2	2	1	00:55	00:58	00:01	0	3	4	1.333333333	right	body	1	F	F	F	0	1	Raider	None	oth	0	NA	0
MAH00669	20131017	09:43	00:00:59	Islo	Flanged	NA	NA	NA	M	A-M	Partial	1	1	0	00:01	00:05	NA	0	4	4	1	left	limbs	1	?	R	F	0	0	NA	NA	NA	NA	NA	NA
MAH00945	20131028	06:44	00:06:06	Islo	Flanged	NA	NA	NA	M	A-M	Full-Partial	5	1	1	00:21	00:27	NA	0	6	9	1.5	left	limbs	1	F	F	F	0	0	NA	NA	NA	NA	NA	NA
MAH00945	20131028	06:44	00:06:06	Islo	Flanged	NA	NA	NA	M	A-M	Full-Partial	5	2	1	00:45	00:45	00:18	1	1	1	1	left	head	0	F	F	M*	1	0	NA	NA	NA	NA	NA	NA
MAH00945	20131028	06:44	00:06:06	Islo	Flanged	NA	NA	NA	M	A-M	Full-Partial	5	3	1	01:33	01:35	00:48	0	2	3	1.5	left	limbs	1	F	F	F	0	0	NA	NA	NA	NA	NA	NA
MAH00945	20131028	06:44	00:06:06	Islo	Flanged	NA	NA	NA	M	A-M	Full-Partial	5	4	1	01:36	01:40	00:01	0	4	5	1.25	left	limbs	1	F	F	M*	1	0	NA	NA	NA	NA	NA	NA
MAH00945	20131028	06:44	00:06:06	Islo	Flanged	NA	NA	NA	M	A-M	Full-Partial	5	5	1	02:47	03:05	01:07	0	18	21	1.166666667	right	limbs	1	F	R	M*	1	0	NA	NA	NA	NA	NA	NA
MAH00946	20131028	06:55	00:02:48	Islo	Flanged	NA	NA	NA	M	A-M	Full-Partial	2	1	1	0:00*	00:05	NA	0	5	7	1.4	left	head	0	F	F	F	0	0	NA	NA	NA	NA	NA	NA
MAH00946	20131028	06:55	00:02:48	Islo	Flanged	NA	NA	NA	M	A-M	Full-Partial	2	2	1	01:57	02:05	01:52	0	8	9	1.125	right	body	1	F	F	M	1	0	NA	NA	NA	NA	NA	NA
MAH00950	20131028	07:06	00:01:02	Islo	Flanged	NA	NA	NA	M	A-M	Full-Partial	1	1	0	0:00*	00:11	NA	0	11	13	1.181818182	right	limbs	1	F	R	M	1	0	NA	NA	NA	NA	NA	NA
MAH00951	20131028	07:22	00:01:12	Islo	Flanged	NA	NA	NA	M	A-M	Full-Partial	1	1	0	0:00*	00:02	NA	0	2	3	1.5	left	body	1	F	R	M*	1	0	NA	NA	NA	NA	NA	NA
MAH00953	20131028	07:38	00:01:01	Islo	Flanged	NA	NA	NA	M	A-M	Full-Partial	1	1	0	0:00*	00:01	NA	0	NA	4	NA	left	body	1	F	R	M*	1	0	NA	NA	NA	NA	NA	NA
MAH00955	20131028	07:42	00:01:12	Islo	Flanged	NA	NA	NA	M	A-M	Full-Partial	1	1	0	0:00*	00:01	NA	0	NA	3	NA	right	body	1	F	M*	F	0	0	NA	NA	NA	NA	NA	NA
MAH00956	20131028	07:46	00:01:09	Islo	Flanged	NA	NA	NA	M	A-M	Full-Partial	1	1	0	0:00*	00:02	NA	0	2	4	2	right	head	0	F?	R	F	0	0	NA	NA	NA	NA	NA	NA
MAH00957	20131028	07:49	00:00:53	Islo	Flanged	NA	NA	NA	M	A-M	Full-Partial	1	1	0	0:00*	0:00*	NA	NA	NA	11	NA	NA	NA	NA	F?	R	M*	1	0	NA	NA	NA	NA	NA	NA
MAH00958	20131028	07:57	00:01:07	Islo	Flanged	NA	NA	NA	M	A-M	Full-Partial	3	1	1	0:00*	00:04	NA	0	4	5	1.25	left	body	1	R	R	R	0	0	NA	NA	NA	NA	NA	NA
MAH00958	20131028	07:57	00:01:07	Islo	Flanged	NA	NA	NA	M	A-M	Full-Partial	3	2	1	00:05	00:08	00:01	0	3	3	1	left	body	1	R	R	M	1	0	NA	NA	NA	NA	NA	NA
MAH00958	20131028	07:57	00:01:07	Islo	Flanged	NA	NA	NA	M	A-M	Full-Partial	3	3	1	0:54*	00:56	00:46	0	2	3	1.5	right	NA	NA	M	R	M	1	0	NA	NA	NA	NA	NA	NA
MAH00965	20131028	09:41	00:00:25	Islo	Flanged	NA	NA	NA	M	A-M	Full-Partial	1	1	0	0:00*	00:12	NA	0	12	12	1	left	limbs	1	M	R	M	1	0	NA	NA	NA	NA	NA	NA
MAH00966	20131028	09:56	00:01:01	Islo	Flanged	NA	NA	NA	M	A-M	Full-Partial	2	1	1	0:00*	00:02	NA	0	2	3	1.5	right	head	0	F	R	M*	1	0	NA	NA	NA	NA	NA	NA
MAH00966	20131028	09:56	00:01:01	Islo	Flanged	NA	NA	NA	M	A-M	Full-Partial	2	2	1	00:19	00:26	00:17	1	7	10	1.428571429	right	NA	NA	F	R	F	0	0	NA	NA	NA	NA	NA	NA
MAH00967	20131028	10:00	00:01:05	Islo	Flanged	NA	NA	NA	M	A-M	Full-Partial	5	1	1	0:00*	0:00*	NA	NA	5	5	1	left	body	1	F	R	R	0	0	NA	NA	NA	NA	NA	NA
MAH00967	20131028	10:00	00:01:05	Islo	Flanged	NA	NA	NA	M	A-M	Full-Partial	5	2	1	0:00*	0:00*	00:01	NA	5	5	1	left	body	1	R	R	M*	1	0	NA	NA	NA	NA	NA	NA
MAH00967	20131028	10:00	00:01:05	Islo	Flanged	NA	NA	NA	M	A-M	Full-Partial	5	3	1	00:21	00:29	00:22	1	8	10	1.25	right	body	1	?	R	R	0	0	NA	NA	NA	NA	NA	NA
MAH00967	20131028	10:00	00:01:05	Islo	Flanged	NA	NA	NA	M	A-M	Full-Partial	5	4	1	00:31	00:31	00:02	1	1	1	1	right	body	1	R	R	R	0	0	NA	NA	NA	NA	NA	NA
MAH00967	20131028	10:00	00:01:05	Islo	Flanged	NA	NA	NA	M	A-M	Full-Partial	5	5	1	00:32	00:39	00:01	0	7	7	1	right	head	0	R	R	M*	1	0	NA	NA	NA	NA	NA	NA
MAH00968	20131028	10:11	00:02:41	Islo	Flanged	NA	NA	NA	M	A-M	Full-Partial	3	1	1	00:59	01:11	NA	0	12	20	1.666666667	right	head	0	R	R	R	0	0	NA	NA	NA	NA	NA	NA
MAH00968	20131028	10:11	00:02:41	Islo	Flanged	NA	NA	NA	M	A-M	Full-Partial	3	2	1	01:14	01:21	00:03	1	7	9	1.285714286	right	body	1	R	R	M*	1	0	NA	NA	NA	NA	NA	NA
MAH00968	20131028	10:11	00:02:41	Islo	Flanged	NA	NA	NA	M	A-M	Full-Partial	3	3	1	01:57	02:04	00:36	0	7	7	1	left	limbs	1	F	F	M*	1	0	NA	NA	NA	NA	NA	NA
MAH00969	20131028	10:14	00:00:22	Islo	Flanged	NA	NA	NA	M	A-M	Full-Partial	2	1	1	0:00*	00:05	NA	0	13	16	1.230769231	left	body	1	M	R	R	0	0	NA	NA	NA	NA	NA	NA
MAH00969	20131028	10:14	00:00:22	Islo	Flanged	NA	NA	NA	M	A-M	Full-Partial	2	2	1	00:09	00:12	00:04	1	3	3	1	left	limbs	1	R	R	M	1	0	NA	NA	NA	NA	NA	NA
MAH00973	20131028	10:31	00:00:18	Islo	Flanged	NA	NA	NA	M	A-M	Full-Partial	1	1	0	0:00*	0:00*	NA	NA	NA	2	NA	right	body	1	M	R	M	1	0	NA	NA	NA	NA	NA	NA
MAH00974	20131028	10:35	00:00:12	Islo	Flanged	NA	NA	NA	M	A-M	Full-Partial	1	1	0	0:00*	0:00*	NA	NA	NA	3	NA	left	body	1	M	R	M	1	0	NA	NA	NA	NA	NA	NA
MAH00975	20131028	10:38	00:00:50	Islo	Flanged	NA	NA	NA	M	A-M	Full-Partial	1	1	0	0:00*	00:04	NA	0	4	5	1.25	right	body	1	M	R	M	1	0	NA	NA	NA	NA	NA	NA
MAH00976	20131028	10:44	00:02:04	Islo	Flanged	NA	NA	NA	M	A-M	Full-Partial	2	1	1	01:33	01:39	NA	0	6	6	1	left	body	1	LCG	R	R	0	0	NA	NA	NA	NA	NA	NA
MAH00976	20131028	10:44	00:02:04	Islo	Flanged	NA	NA	NA	M	A-M	Full-Partial	2	2	1	01:39	01:42	00:00	0	3	3	1	left	head	0	R	R	Bridge	1	0	NA	NA	NA	NA	NA	NA
MAH00978	20131028	10:48	00:01:10	Islo	Flanged	NA	NA	NA	M	A-M	Full-Partial	4	1	1	0:00*	0:00*	NA	NA	NA	10	NA	NA	NA	NA	R?	R?	R?	0	0	NA	NA	NA	NA	NA	NA
MAH00978	20131028	10:48	00:01:10	Islo	Flanged	NA	NA	NA	M	A-M	Full-Partial	4	2	1	00:05	00:11	00:05	1	6	9	1.5	NA	NA	NA	R?	R?	R?	0	0	NA	NA	NA	NA	NA	NA
MAH00978	20131028	10:48	00:01:10	Islo	Flanged	NA	NA	NA	M	A-M	Full-Partial	4	3	1	00:47	00:51	00:36	0	4	5	1.25	right	NA	NA	R	R	R	0	0	NA	NA	NA	NA	NA	NA
MAH00978	20131028	10:48	00:01:10	Islo	Flanged	NA	NA	NA	M	A-M	Full-Partial	4	4	1	00:55	00:59	00:04	1	4	5	1.25	right	limbs	1	R	R	M	1	0	NA	NA	NA	NA	NA	NA
MAH00979	20131028	10:50	00:00:51	Islo	Flanged	NA	NA	NA	M	A-M	Full-Partial	1	1	0	0:00*	00:12	NA	0	12	13	1.083333333	right	limbs	1	M?	R	M	1	0	NA	NA	NA	NA	NA	NA
MAH00162	20130924	16:23	00:01:37	Ulysses	Unflanged	NA	NA	NA	M	A-M	Partial	5	1	1	0:00*	0:00*	NA	NA	1	1	1	left	head	0	F-Ins	R	R	0	0	NA	NA	NA	NA	NA	NA
MAH00162	20130924	16:23	00:01:37	Ulysses	Unflanged	NA	NA	NA	M	A-M	Partial	5	2	1	0:00*	0:00*	NA	NA	1	1	1	left	limbs	1	R	R	R	0	0	NA	NA	NA	NA	NA	NA
MAH00162	20130924	16:23	00:01:37	Ulysses	Unflanged	NA	NA	NA	M	A-M	Partial	5	3	1	0:00*	0:00*	NA	NA	1	1	1	left	limbs	1	R	R	R	0	0	NA	NA	NA	NA	NA	NA
MAH00162	20130924	16:23	00:01:37	Ulysses	Unflanged	NA	NA	NA	M	A-M	Partial	5	4	1	0:00*	0:00*	NA	NA	1	1	1	left	head	0	R	R	R	0	0	NA	NA	NA	NA	NA	NA
MAH00162	20130924	16:23	00:01:37	Ulysses	Unflanged	NA	NA	NA	M	A-M	Partial	5	5	1	00:02	00:03	00:03	1	1	2	2	left	body	1	R	R	F-Ins	0	0	NA	NA	NA	NA	NA	NA
MAH00167	20130924	17:46	00:01:51	Ulysses	Unflanged	NA	NA	NA	M	A-M	Partial	7	1	1	0:00*	0:00*	NA	NA	NA	5	NA	NA	NA	NA	?	R?	M	1	0	NA	NA	NA	NA	NA	NA
MAH00167	20130924	17:46	00:01:51	Ulysses	Unflanged	NA	NA	NA	M	A-M	Partial	7	2	1	0:00*	0:00*	NA	NA	NA	7	NA	NA	NA	NA	M	R?	M	1	0	NA	NA	NA	NA	NA	NA
MAH00167	20130924	17:46	00:01:51	Ulysses	Unflanged	NA	NA	NA	M	A-M	Partial	7	3	1	00:48	00:56	00:50	0	8	8	1	right	limbs	1	Bridge	Bridge	Bridge	1	0	NA	NA	NA	NA	NA	NA
MAH00167	20130924	17:46	00:01:51	Ulysses	Unflanged	NA	NA	NA	M	A-M	Partial	7	4	1	01:20	01:22	00:24	1	2	2	1	right	limbs	1	Bridge	Bridge	Bridge	1	0	NA	NA	NA	NA	NA	NA
MAH00167	20130924	17:46	00:01:51	Ulysses	Unflanged	NA	NA	NA	M	A-M	Partial	7	5	1	01:23	01:28	00:01	0	5	6	1.2	right	body	1	Bridge	Bridge	Bridge	1	0	NA	NA	NA	NA	NA	NA
MAH00167	20130924	17:46	00:01:51	Ulysses	Unflanged	NA	NA	NA	M	A-M	Partial	7	6	1	01:32	01:34	00:04	1	2	4	2	right	head	0	Bridge	Bridge	Bridge	1	0	NA	NA	NA	NA	NA	NA
MAH00167	20130924	17:46	00:01:51	Ulysses	Unflanged	NA	NA	NA	M	A-M	Partial	7	7	1	01:36	01:40	00:02	1	4	5	1.25	right	body	1	Bridge	Bridge	M	1	0	NA	NA	NA	NA	NA	NA
MAH00172	20130925	06:25	00:01:00	Ulysses	Unflanged	NA	NA	NA	M	A-M	Full	5	1	1	0:00*	0:00*	NA	NA	1	1	1	left	head	0	F	F	F	0	0	NA	NA	NA	NA	NA	NA
MAH00172	20130925	06:25	00:01:00	Ulysses	Unflanged	NA	NA	NA	M	A-M	Full	5	2	1	00:07	00:07	00:08	1	1	1	1	left	body	1	F	F	F	0	0	NA	NA	NA	NA	NA	NA
MAH00172	20130925	06:25	00:01:00	Ulysses	Unflanged	NA	NA	NA	M	A-M	Full	5	3	1	00:17	00:17	00:10	1	1	1	1	left	body	1	F	F	F	0	0	NA	NA	NA	NA	NA	NA
MAH00172	20130925	06:25	00:01:00	Ulysses	Unflanged	NA	NA	NA	M	A-M	Full	5	4	1	00:20	00:20	00:03	1	1	1	1	left	head	0	F	F	F	0	0	NA	NA	NA	NA	NA	NA
MAH00172	20130925	06:25	00:01:00	Ulysses	Unflanged	NA	NA	NA	M	A-M	Full	5	5	1	00:25	00:25	00:05	1	1	1	1	left	body	1	F	F	F	0	0	NA	NA	NA	NA	NA	NA
MAH00173	20130925	06:29	00:01:03	Ulysses	Unflanged	NA	NA	NA	M	A-M	Full	1	1	0	00:22	00:28	NA	0	6	7	1.166666667	right	switch	1	F	F	F	0	0	NA	NA	NA	NA	NA	NA
MAH00180	20130925	07:17	00:01:02	Ulysses	Unflanged	NA	NA	NA	M	A-M	Full	5	1	1	00:10	00:11	NA	0	1.5	2	1.333333333	left	limbs	1	F-Ins	R	R	0	0	NA	NA	NA	NA	NA	NA
MAH00180	20130925	07:17	00:01:02	Ulysses	Unflanged	NA	NA	NA	M	A-M	Full	5	2	1	00:13	00:15	00:02	1	2	3	1.5	left	limbs	1	R	R	F-Ins	0	0	NA	NA	NA	NA	NA	NA
MAH00180	20130925	07:17	00:01:02	Ulysses	Unflanged	NA	NA	NA	M	A-M	Full	5	3	1	00:41	00:41	00:26	1	1	1	1	left	body	1	F-Ins	F-Ins	F-Ins	0	0	NA	NA	NA	NA	NA	NA
MAH00180	20130925	07:17	00:01:02	Ulysses	Unflanged	NA	NA	NA	M	A-M	Full	5	4	1	00:45	00:45	00:04	1	1	1	1	left	body	1	F-Ins	F-Ins	F-Ins	0	0	NA	NA	NA	NA	NA	NA
MAH00180	20130925	07:17	00:01:02	Ulysses	Unflanged	NA	NA	NA	M	A-M	Full	5	5	1	00:53	00:56	00:08	1	3	4	1.333333333	left	limbs	1	F-Ins	F-Ins	M	1	0	NA	NA	NA	NA	NA	NA
MAH00185	20130925	08:01	00:02:39	Ulysses	Unflanged	NA	NA	NA	M	A-M	Full	6	1	1	00:42	00:43	NA	0	1	2	2	right	head	0	F	F	F	0	0	NA	NA	NA	NA	NA	NA
MAH00185	20130925	08:01	00:02:39	Ulysses	Unflanged	NA	NA	NA	M	A-M	Full	6	2	1	00:53	00:56	00:10	1	3	4	1.333333333	right	switch	1	F	F	F	0	0	NA	NA	NA	NA	NA	NA
MAH00185	20130925	08:01	00:02:39	Ulysses	Unflanged	NA	NA	NA	M	A-M	Full	6	3	1	01:12	01:13	00:16	1	1	2	2	right	head	0	F	F	F	0	0	NA	NA	NA	NA	NA	NA
MAH00185	20130925	08:01	00:02:39	Ulysses	Unflanged	NA	NA	NA	M	A-M	Full	6	4	1	02:09	02:12	00:56	0	3	4	1.333333333	right	body	1	F	F	R	0	0	NA	NA	NA	NA	NA	NA
MAH00185	20130925	08:01	00:02:39	Ulysses	Unflanged	NA	NA	NA	M	A-M	Full	6	5	1	02:13	02:15	00:01	0	2	2	1	right	head	0	R	R	R	0	0	NA	NA	NA	NA	NA	NA
MAH00185	20130925	08:01	00:02:39	Ulysses	Unflanged	NA	NA	NA	M	A-M	Full	6	6	1	02:16	02:21	00:01	0	5	7	1.4	right	limbs	1	R	R	M*	1	0	NA	NA	NA	NA	NA	NA
MAH00186	20130925	08:13	00:00:32	Ulysses	Unflanged	NA	NA	NA	M	A-M	Full	4	1	1	0:00*	0:00*	NA	NA	NA	4	NA	NA	NA	NA	M	R	R	0	0	NA	NA	NA	NA	NA	NA
MAH00186	20130925	08:13	00:00:32	Ulysses	Unflanged	NA	NA	NA	M	A-M	Full	4	2	1	00:04	00:06	00:10	1	2.5	4	1.6	left	switch	1	R	R	R	0	0	NA	NA	NA	NA	NA	NA
MAH00186	20130925	08:13	00:00:32	Ulysses	Unflanged	NA	NA	NA	M	A-M	Full	4	3	1	00:07	00:08	00:01	0	1.5	2	1.333333333	left	head	0	R	R	R	0	0	NA	NA	NA	NA	NA	NA
MAH00186	20130925	08:13	00:00:32	Ulysses	Unflanged	NA	NA	NA	M	A-M	Full	4	4	1	00:09	00:10	00:01	0	1	1	1	left	body	1	R	R	F	0	0	NA	NA	NA	NA	NA	NA
MAH00187	20130925	08:29	00:01:18	Ulysses	Unflanged	NA	NA	NA	M	A-M	Full	3	1	1	0:00*	0:00*	NA	NA	1	2	2	left	head	0	F	F	F	0	0	NA	NA	NA	NA	NA	NA
MAH00187	20130925	08:29	00:01:18	Ulysses	Unflanged	NA	NA	NA	M	A-M	Full	3	2	1	0:00*	0:00*	00:02	NA	1	1	1	left	body	1	F	F	F	0	0	NA	NA	NA	NA	NA	NA
MAH00187	20130925	08:29	00:01:18	Ulysses	Unflanged	NA	NA	NA	M	A-M	Full	3	3	1	00:59	00:59	01:00	0	1	1	1	left	head	0	F	F	M	1	0	NA	NA	NA	NA	NA	NA
MAH00188	20130925	08:31	00:00:14	Ulysses	Unflanged	NA	NA	NA	M	A-M	Full	1	1	0	0:00*	0:00*	NA	NA	1	1	1	left	limbs	1	M	R	M	1	0	NA	NA	NA	NA	NA	NA
MAH00196	20130925	09:04	00:06:10	Ulysses	Unflanged	NA	NA	NA	M	A-M	Full	1	1	0	01:55	01:57	NA	0	2	4	2	left	limbs	1	R	R	R	0	1	Gura	None	oth	0	0	0
MAH00202	20130925	09:49	00:01:18	Ulysses	Unflanged	NA	NA	NA	M	A-M	Full	1	1	0	00:07	00:09	NA	0	2	3	1.5	left	limbs	1	R	R	F-Ins	0	1	Gura	None	oth	0	0	0
MAH00203	20130925	10:02	00:00:26	Ulysses	Unflanged	NA	NA	NA	M	A-M	Full	1	1	0	0:00*	00:00	NA	0	1.5	2	1.333333333	right	body	1	F	Bridge	M	1	1	Gura	None	oth	0	0	0
MAH00204	20130925	10:07	00:00:33	Ulysses	Unflanged	NA	NA	NA	M	A-M	Full	2	1	1	0:00*	00:01	NA	0	1.5	2	1.333333333	left	switch	1	F	F	F	0	1	Gura	None	oth	0	0	0
MAH00204	20130925	10:07	00:00:33	Ulysses	Unflanged	NA	NA	NA	M	A-M	Full	2	2	1	00:02	00:03	00:01	0	1	1	1	left	body	1	F	F	F	0	1	Gura	None	oth	0	0	0
MAH00205	20130925	10:12	00:03:43	Ulysses	Unflanged	NA	NA	NA	M	A-M	Full	3	1	1	00:39	00:44	NA	0	5	5	1	left	body	1	M	R	M	1	1	Gura	None	oth	0	0	0
MAH00205	20130925	10:12	00:03:43	Ulysses	Unflanged	NA	NA	NA	M	A-M	Full	3	2	1	01:20	01:24	00:36	0	4	7	1.75	right	switch	1	M	R	M	1	1	Gura	None	oth	0	0	0
MAH00205	20130925	10:12	00:03:43	Ulysses	Unflanged	NA	NA	NA	M	A-M	Full	3	3	1	1:36*	01:45	00:12	1	9	10	1.111111111	left	switch	1	M	R	M	1	1	Gura	None	oth	0	0	0
MAH00209	20130925	10:18	00:01:10	Ulysses	Unflanged	NA	NA	NA	M	A-M	Full	3	1	1	00:20	00:20	NA	0	1	1	1	right	body	1	F	R	R	0	1	Gura	None	oth	0	0	0
MAH00209	20130925	10:18	00:01:10	Ulysses	Unflanged	NA	NA	NA	M	A-M	Full	3	2	1	00:21	00:21	00:01	0	1	1	1	right	head	0	R	R	R	0	1	Gura	None	oth	0	0	0
MAH00209	20130925	10:18	00:01:10	Ulysses	Unflanged	NA	NA	NA	M	A-M	Full	3	3	1	00:26	00:33	00:05	1	7	7	1	right	body	1	R	R	?	NA	1	Gura	None	oth	0	0	0
MAH00211	20130925	10:24	00:02:32	Ulysses	Unflanged	NA	NA	NA	M	A-M	Full	5	1	1	00:05	00:05	NA	0	1	1	1	right	head	0	F	R	R	0	1	Gura	None	oth	1	0	0
MAH00211	20130925	10:24	00:02:32	Ulysses	Unflanged	NA	NA	NA	M	A-M	Full	5	2	1	0:50*	00:53	00:45	0	3	3	1	right	head	0	R	R	R	0	1	Gura	None	oth	1	0	0
MAH00211	20130925	10:24	00:02:32	Ulysses	Unflanged	NA	NA	NA	M	A-M	Full	5	3	1	00:53	00:54	00:00	0	1	2	2	right	body	1	R	R	R	0	1	Gura	None	oth	1	0	0
MAH00211	20130925	10:24	00:02:32	Ulysses	Unflanged	NA	NA	NA	M	A-M	Full	5	4	1	00:56	00:56	00:02	1	1	1	1	right	head	0	R	R	R	0	1	Gura	None	oth	1	0	0
MAH00211	20130925	10:24	00:02:32	Ulysses	Unflanged	NA	NA	NA	M	A-M	Full	5	5	1	01:30	01:37	00:34	0	7	7	1	right	head	0	R	R	F	0	1	Gura	None	oth	1	0	0
MAH00214	20130925	10:31	00:01:44	Ulysses	Unflanged	NA	NA	NA	M	A-M	Full	1	1	0	01:17	01:20	NA	0	3	5	1.666666667	left	head	0	F	R	R	0	1	Gura	None	oth	1	1	0
MAH00218	20130925	10:43	00:03:15	Ulysses	Unflanged	NA	NA	NA	M	A-M	Full	1	1	0	01:09	01:13	NA	0	4	4	1	left	head	0	M*	R	M*	1	1	Gura	None	oth	0	1	0
MAH00221	20130925	11:00	00:01:00	Ulysses	Unflanged	NA	NA	NA	M	A-M	Full	1	1	0	0:00*	00:01	NA	0	3	4	1.333333333	right	head	0	F-Ins	R	F-Ins	0	1	Gura	None	oth	0	0	0
MAH00222	20130925	11:01	00:00:56	Ulysses	Unflanged	NA	NA	NA	M	A-M	Full	1	1	0	0:00*	00:02	NA	0	2	3	1.5	right	head	0	R	R	M	1	1	Gura	None	oth	0	0	0
MAH00223	20130925	11:03	00:00:50	Ulysses	Unflanged	NA	NA	NA	M	A-M	Full	1	1	0	0:00*	0:00*	NA	NA	1	1	1	left	head	0	M	R	F	0	1	Gura	None	oth	0	0	0
MAH00229	20130925	11:23	00:00:18	Ulysses	Unflanged	NA	NA	NA	M	A-M	Full	1	1	0	0:00*	0:00*	NA	NA	NA	2	NA	left	body	1	R	R	R	0	1	Gura	None	oth	0	0	0
MAH00230	20130925	11:24	00:00:29	Ulysses	Unflanged	NA	NA	NA	M	A-M	Full	1	1	0	0:00*	0:00*	NA	NA	NA	2	NA	left	body	1	R	R	R	0	1	Gura	None	oth	0	0	0
MAH00231	20130925	11:29	00:00:10	Ulysses	Unflanged	NA	NA	NA	M	A-M	Full	1	1	0	0:00*	0:00*	NA	NA	NA	2	NA	left	body	1	R	R	R	0	1	Gura	None	oth	0	0	0
MAH00232	20130925	11:31	00:00:34	Ulysses	Unflanged	NA	NA	NA	M	A-M	Full	1	1	0	00:00	00:01	NA	0	1.5	2	1.333333333	right	NA	NA	R	R	R	0	1	Gura	None	oth	0	0	0
MAH00237	20130925	11:41	00:01:00	Ulysses	Unflanged	NA	NA	NA	M	A-M	Full	1	1	0	0:00*	00:03	NA	0	3	5	1.666666667	left	limbs	1	R	R	M	1	1	Gura	None	oth	0	0	0
MAH00239	20130925	11:46	00:02:44	Ulysses	Unflanged	NA	NA	NA	M	A-M	Full	1	1	0	02:28	02:28	NA	0	1	1	1	right	limbs	1	R	R	R	0	1	Gura	None	oth	1	1	0
MAH00240	20130925	11:54	00:00:33	Ulysses	Unflanged	NA	NA	NA	M	A-M	Full	1	1	0	0:00*	0:00*	NA	NA	NA	5	NA	right	limbs	1	M?	Bridge	M	1	1	Gura	None	oth	0	1	0
MAH00243	20130925	12:08	00:01:02	Ulysses	Unflanged	NA	NA	NA	M	A-M	Full	1	1	0	00:30	0:32*	NA	NA	2	2	1	left	head	0	R	R	R	0	1	Gura	None	oth	1	1	0
MAH00244	20130925	12:11	00:00:59	Ulysses	Unflanged	NA	NA	NA	M	A-M	Full	1	1	0	00:20	00:24	NA	0	3.5	5	1.428571429	left	body	1	R	R	M*	1	1	Gura	None	oth	0	0	0
MAH00249	20130925	13:13	00:00:15	Ulysses	Unflanged	NA	NA	NA	M	A-M	Full	1	1	0	0:00*	0:00*	NA	NA	4	4	1	left	limbs	1	F	F	F	0	0	NA	NA	NA	NA	NA	NA
MAH00251	20130925	13:33	00:01:41	Ulysses	Unflanged	NA	NA	NA	M	A-M	Full	5	1	1	0:00*	00:08	NA	0	8	11	1.375	left	limbs	1	R	R	R	0	0	NA	NA	NA	NA	NA	NA
MAH00251	20130925	13:33	00:01:41	Ulysses	Unflanged	NA	NA	NA	M	A-M	Full	5	2	1	00:14	00:15	00:06	1	1	1	1	left	limbs	1	R	R	R	0	0	NA	NA	NA	NA	NA	NA
MAH00251	20130925	13:33	00:01:41	Ulysses	Unflanged	NA	NA	NA	M	A-M	Full	5	3	1	00:17	00:18	00:02	1	1	1	1	left	limbs	1	R	R	R	0	0	NA	NA	NA	NA	NA	NA
MAH00251	20130925	13:33	00:01:41	Ulysses	Unflanged	NA	NA	NA	M	A-M	Full	5	4	1	00:20	00:21	00:02	1	1	1	1	left	limbs	1	R	R	R	0	0	NA	NA	NA	NA	NA	NA
MAH00251	20130925	13:33	00:01:41	Ulysses	Unflanged	NA	NA	NA	M	A-M	Full	5	5	1	00:52	00:54	00:31	0	1.5	2	1.333333333	left	switch	1	M	R	M	1	0	NA	NA	NA	NA	NA	NA
MAH00253	20130925	13:47	00:00:46	Ulysses	Unflanged	NA	NA	NA	M	A-M	Full	4	1	1	0:00*	0:00*	NA	NA	NA	NA	NA	left	body	1	F-Ins	F-Ins	F-Ins	0	0	NA	NA	NA	NA	NA	NA
MAH00253	20130925	13:47	00:00:46	Ulysses	Unflanged	NA	NA	NA	M	A-M	Full	4	2	1	00:02	00:05	00:03	1	3	3	1	right	NA	NA	F-Ins	F-Ins	F-Ins	0	0	NA	NA	NA	NA	NA	NA
MAH00253	20130925	13:47	00:00:46	Ulysses	Unflanged	NA	NA	NA	M	A-M	Full	4	3	1	00:14	00:18	00:09	1	4	6	1.5	left	body	1	F-Ins	F-Ins	F-Ins	0	0	NA	NA	NA	NA	NA	NA
MAH00253	20130925	13:47	00:00:46	Ulysses	Unflanged	NA	NA	NA	M	A-M	Full	4	4	1	00:20	00:23	00:02	1	3	3	1	left	NA	NA	F-Ins	F-Ins	F-Ins	0	0	NA	NA	NA	NA	NA	NA
MAH00254	20130925	13:49	00:00:53	Ulysses	Unflanged	NA	NA	NA	M	A-M	Full	2	1	1	00:00	00:03	NA	0	3	3	1	right	limbs	1	F-Ins	R	R	0	0	NA	NA	NA	NA	NA	NA
MAH00254	20130925	13:49	00:00:53	Ulysses	Unflanged	NA	NA	NA	M	A-M	Full	2	2	1	00:03	00:17	00:00	0	14	14	1	right	body	1	R	R	F-Ins	0	0	NA	NA	NA	NA	NA	NA
MAH00256	20130925	13:56	00:00:27	Ulysses	Unflanged	NA	NA	NA	M	A-M	Full	3	1	1	0:00*	0:00*	NA	NA	NA	2	NA	left	body	1	F-Ins	R	R	0	0	NA	NA	NA	NA	NA	NA
MAH00256	20130925	13:56	00:00:27	Ulysses	Unflanged	NA	NA	NA	M	A-M	Full	3	2	1	0:00*	00:01	00:01	0	NA	NA	NA	left	head	0	R	R	R	0	0	NA	NA	NA	NA	NA	NA
MAH00256	20130925	13:56	00:00:27	Ulysses	Unflanged	NA	NA	NA	M	A-M	Full	3	3	1	00:09	00:14	00:08	1	5	5	1	left	body	1	R	R	F-Ins	0	0	NA	NA	NA	NA	NA	NA
MAH00257	20130925	14:06	00:00:50	Ulysses	Unflanged	NA	NA	NA	M	A-M	Full	1	1	0	0:00*	00:01	NA	0	NA	NA	NA	left	body	1	R	R	M	1	0	NA	NA	NA	NA	NA	NA
MAH00258	20130925	14:17	00:00:10	Ulysses	Unflanged	NA	NA	NA	M	A-M	Full	1	1	0	0:00*	0:00*	NA	NA	1	1	1	left	limbs	1	M?	R	M	1	0	NA	NA	NA	NA	NA	NA
MAH00259	20130925	14:28	00:00:13	Ulysses	Unflanged	NA	NA	NA	M	A-M	Full	1	1	0	00:06	00:07	NA	0	1	1	1	left	head	0	M	M	M	1	0	NA	NA	NA	NA	NA	NA
MAH00264	20130925	14:42	00:00:45	Friska	Mother	60	13	6	F	A-F	Partial	1	1	0	0:00*	00:01	NA	0	1.5	2	1.333333333	left	head	0	F	F	F	0	1	Frankie	Infant	off	0	0	0
MAH00265	20130925	14:44	00:01:49	Ulysses	Unflanged	NA	NA	NA	M	A-M	Full	1	1	0	01:08	01:08	NA	0	1	1	1	left	head	0	F	F	F	0	1	Frankie	None	oth	1	1	0
MAH00265	20130925	14:44	00:01:49	Frankie	Infant	1	NA	NA	M	D-M	Partial	1	1	0	01:18	01:26	NA	0	8	8	1	right	head	0	APO	APO	APO	0	1	Rakus	None	oth	1	1	0
MAH00266	20130925	14:59	00:13:00	Fredy	Juvenile	8	NA	NA	M	D-M	Partial	1	1	0	00:01	00:03	NA	0	2	3	1.5	right	body	1	M	R	M	1	1	Rakus	None	oth	1	1	0
MAH00266	20130925	14:59	00:13:00	Ulysses	Unflanged	NA	NA	NA	M	A-M	Full	11	1	1	00:27	00:28	NA	0	1	1	1	right	body	1	Soc-SexIns	R	F	0	1	Friska+Frankie	None	oth	1	0	0
MAH00266	20130925	14:59	00:13:00	Ulysses	Unflanged	NA	NA	NA	M	A-M	Full	11	2	1	02:19	02:20	01:51	0	1	2	2	right	body	1	F?	F?	F	0	1	Friska+Frankie	None	oth	1	0	0
MAH00266	20130925	14:59	00:13:00	Ulysses	Unflanged	NA	NA	NA	M	A-M	Full	11	3	1	08:08	08:08	05:48	0	1	1	1	left	head	0	F	F	F	0	1	Friska+Frankie	None	oth	1	0	0
MAH00266	20130925	14:59	00:13:00	Ulysses	Unflanged	NA	NA	NA	M	A-M	Full	11	4	1	08:38	08:41	00:30	1	3	5	1.666666667	left	body	1	Peer	Peer	R	0	1	Friska+Frankie	None	oth	1	0	0
MAH00266	20130925	14:59	00:13:00	Ulysses	Unflanged	NA	NA	NA	M	A-M	Full	11	5	1	09:19	09:21	00:38	0	1.5	2	1.333333333	left	switch	1	R	R	F	0	1	Friska+Frankie	None	oth	1	0	0
MAH00266	20130925	14:59	00:13:00	Ulysses	Unflanged	NA	NA	NA	M	A-M	Full	11	6	1	09:25	09:28	00:04	1	3	3	1	left	body	1	F	F	F	0	1	Friska+Frankie	None	oth	1	0	0
MAH00266	20130925	14:59	00:13:00	Ulysses	Unflanged	NA	NA	NA	M	A-M	Full	11	7	1	09:42	09:42	00:14	1	1	1	1	right	head	0	F	F	F	0	1	Friska+Frankie	None	oth	1	0	0
MAH00266	20130925	14:59	00:13:00	Ulysses	Unflanged	NA	NA	NA	M	A-M	Full	11	8	1	11:20	11:25	01:38	0	5	2	0.4	right	limbs	1	F	F	F	0	1	Friska+Frankie	None	oth	1	0	0
MAH00266	20130925	14:59	00:13:00	Ulysses	Unflanged	NA	NA	NA	M	A-M	Full	11	9	1	11:38	11:40	00:13	1	2	2	1	right	limbs	1	F	F	F	0	1	Friska+Frankie	None	oth	1	0	0
MAH00266	20130925	14:59	00:13:00	Ulysses	Unflanged	NA	NA	NA	M	A-M	Full	11	10	1	11:51	11:52	00:11	1	1	1	1	right	limbs	1	F	F	F	0	1	Friska+Frankie	None	oth	1	0	0
MAH00266	20130925	14:59	00:13:00	Ulysses	Unflanged	NA	NA	NA	M	A-M	Full	11	11	1	12:08	12:08	00:16	1	1	1	1	right	head	0	F	F	F	0	1	Friska+Frankie	None	oth	1	0	0
MAH00266	20130925	14:59	00:13:00	Frankie	Infant	1	NA	NA	M	D-M	Partial	1	1	0	05:34	05:35	NA	0	1	1	1	right	head	0	Peer	Peer	Peer	0	0	Friska	Mother	mot	NA	NA	NA
MAH00267	20130925	15:02	00:00:42	Ulysses	Unflanged	NA	NA	NA	M	A-M	Full	2	1	1	0:00*	00:03	NA	0	3	3	1	left	body	1	F	F	F	0	1	Friska+Frankie	None	oth	1	0	0
MAH00267	20130925	15:02	00:00:42	Ulysses	Unflanged	NA	NA	NA	M	A-M	Full	2	2	1	00:07	00:10	00:04	1	3	4	1.333333333	left	body	1	F	F	F	0	1	Friska+Frankie	None	oth	0	0	0
MAH00270	20130925	15:09	00:00:12	Ulysses	Unflanged	NA	NA	NA	M	A-M	Full	1	1	0	0:00*	00:03	NA	0	3	4	1.333333333	right	body	1	M?	Bridge	M	1	1	Fredy	None	oth	1	1	1
MAH00271	20130925	15:11	00:00:35	Ulysses	Unflanged	NA	NA	NA	M	A-M	Full	1	1	0	0:00*	0:00*	NA	NA	NA	5	NA	right	head	0	M	R	M	1	1	Fredy	None	oth	0	0	0
MAH00272	20130925	15:16	00:00:35	Ulysses	Unflanged	NA	NA	NA	M	A-M	Full	3	1	1	00:01	00:02	NA	0	1	1	1	left	limbs	1	F-Ins	F	F	0	1	Fredy	None	oth	0	0	0
MAH00272	20130925	15:16	00:00:35	Ulysses	Unflanged	NA	NA	NA	M	A-M	Full	3	2	1	00:03	00:04	00:01	0	1	1	1	left	limbs	1	F	F	F	0	1	Fredy	None	oth	0	0	0
MAH00272	20130925	15:16	00:00:35	Ulysses	Unflanged	NA	NA	NA	M	A-M	Full	3	3	1	00:05	00:05	00:01	0	1	1	1	left	head	0	F	F	F	0	1	Fredy	None	oth	0	0	0
MAH00273	20130925	15:19	00:00:38	Ulysses	Unflanged	NA	NA	NA	M	A-M	Full	1	1	0	00:20	00:20	NA	0	1	1	1	right	head	0	R	R	F	0	1	Fredy	None	oth	0	0	0
MAH00282	20130925	16:02	00:00:53	Ulysses	Unflanged	NA	NA	NA	M	A-M	Full	1	1	0	00:05	00:06	NA	0	1	2	2	right	head	0	SP	R	SP	0	1	Fredy	None	oth	1	1	0
MAH00285	20130925	16:06	00:00:15	Ulysses	Unflanged	NA	NA	NA	M	A-M	Full	1	1	0	0:00*	00:01	NA	0	NA	NA	NA	left	limbs	1	M	R	M	1	1	Fredy	None	oth	0	0	0
MAH00287	20130925	16:18	00:00:14	Ulysses	Unflanged	NA	NA	NA	M	A-M	Full	1	1	0	0:00*	00:01	NA	0	NA	NA	NA	left	body	1	F	R	M	1	0	NA	NA	NA	NA	NA	NA
MAH00288	20130925	16:29	00:00:56	Ulysses	Unflanged	NA	NA	NA	M	A-M	Full	2	1	1	00:13	00:15	NA	0	2	2	1	left	switch	1	F-Ins	R	R	0	0	NA	NA	NA	NA	NA	NA
MAH00288	20130925	16:29	00:00:56	Ulysses	Unflanged	NA	NA	NA	M	A-M	Full	2	2	1	00:18	00:22	00:03	1	4	5	1.25	left	body	1	R	R	F-Ins	0	0	NA	NA	NA	NA	NA	NA
MAH00289	20130925	16:29	00:00:17	Ulysses	Unflanged	NA	NA	NA	M	A-M	Full	1	1	0	0:00*	0:00*	NA	NA	NA	2	NA	right	head	0	F-Ins	R	F-Ins	0	0	NA	NA	NA	NA	NA	NA
MAH00293	20130925	16:41	00:00:16	Ulysses	Unflanged	NA	NA	NA	M	A-M	Full	2	1	1	0:00*	00:02	NA	0	2	2	1	right	limbs	1	F-Ins	R	R	0	0	NA	NA	NA	NA	NA	NA
MAH00293	20130925	16:41	00:00:16	Ulysses	Unflanged	NA	NA	NA	M	A-M	Full	2	2	1	00:02	00:03	00:00	0	1	1	1	right	head	0	R	R	M	1	0	NA	NA	NA	NA	NA	NA
MAH00294	20130925	17:02	00:00:31	Ulysses	Unflanged	NA	NA	NA	M	A-M	Full	1	1	0	0:00*	0:00*	NA	NA	10	10	1	right	body	1	M?	R?	M	1	0	NA	NA	NA	NA	NA	NA
MAH00296	20130925	17:23	00:00:17	Ulysses	Unflanged	NA	NA	NA	M	A-M	Full	1	1	0	0:00*	00:05	NA	0	5	8	1.6	left	head	0	M	R	M	1	0	NA	NA	NA	NA	NA	NA
MAH00297	20130925	17:33	00:05:30	Ulysses	Unflanged	NA	NA	NA	M	A-M	Full	1	1	0	03:07	03:09	NA	0	2	3	1.5	left	body	1	Nest	R	Nest	0	0	NA	NA	NA	NA	NA	NA
MAH00753	20131022	06:29	00:02:01	Lisa	Mother	NA	36	2	F	A-F	Full	1	1	0	0:00*	00:14	NA	0	14	16	1.142857143	left	limbs	1	M	R	M	1	1	Lois	Infant	off	1	0	0
MAH00755	20131022	06:39	00:01:08	Lois	Infant	3	NA	NA	M	D-M	Full-Partial	1	1	0	0:00*	00:08	NA	0	8	12	1.5	right	body	1	F	R	M	1	1	Lisa	Mother	mot	0	0	0
MAH00763	20131022	07:24	00:05:55	Lois	Infant	3	NA	NA	M	D-M	Full-Partial	16	1	1	0:28*	00:30	NA	0	2	2	1	right	limbs	1	F	R	R	0	1	Lisa	Mother	mot	1	0	0
MAH00763	20131022	07:24	00:05:55	Lois	Infant	3	NA	NA	M	D-M	Full-Partial	16	2	1	00:38	00:41	00:08	1	3	5	1.666666667	right	limbs	1	R	R	R	0	1	Lisa	Mother	mot	0	0	0
MAH00763	20131022	07:24	00:05:55	Lois	Infant	3	NA	NA	M	D-M	Full-Partial	16	3	1	00:41	00:59	00:00	0	18	30	1.666666667	right	body	1	R	R	R	0	1	Lisa	Mother	mot	1	0	0
MAH00763	20131022	07:24	00:05:55	Lois	Infant	3	NA	NA	M	D-M	Full-Partial	16	4	1	01:07	01:09	00:08	1	2	2	1	right	limbs	1	R	R	R	0	1	Lisa	Mother	mot	0	0	0
MAH00763	20131022	07:24	00:05:55	Lois	Infant	3	NA	NA	M	D-M	Full-Partial	16	5	1	01:33	01:34	00:24	1	1	1	1	right	limbs	1	R	R	R	0	1	Lisa	Mother	mot	1	0	0
MAH00763	20131022	07:24	00:05:55	Lois	Infant	3	NA	NA	M	D-M	Full-Partial	16	6	1	01:36	01:54	00:02	1	18	27	1.5	right	limbs	1	R	R	R	0	1	Lisa	Mother	mot	1	0	0
MAH00763	20131022	07:24	00:05:55	Lois	Infant	3	NA	NA	M	D-M	Full-Partial	16	7	1	02:04	02:05	00:10	1	1	1	1	right	head	0	R	R	R	0	1	Lisa	Mother	mot	1	0	0
MAH00763	20131022	07:24	00:05:55	Lois	Infant	3	NA	NA	M	D-M	Full-Partial	16	8	1	02:06	02:22	00:01	0	16	22	1.375	right	body	1	R	R	APO	0	1	Lisa	Mother	mot	1	0	0
MAH00763	20131022	07:24	00:05:55	Lois	Infant	3	NA	NA	M	D-M	Full-Partial	16	9	1	03:05	03:06	00:43	0	1.5	2	1.333333333	right	head	0	APO	R	R	0	1	Lisa	Mother	mot	0	0	0
MAH00763	20131022	07:24	00:05:55	Lois	Infant	3	NA	NA	M	D-M	Full-Partial	16	10	1	03:07	03:12	00:01	0	5	7	1.4	right	switch	1	R	R	APO	0	1	Lisa	Mother	mot	0	0	0
MAH00763	20131022	07:24	00:05:55	Lois	Infant	3	NA	NA	M	D-M	Full-Partial	16	11	1	04:09	04:15	00:57	0	6	10	1.666666667	right	body	1	APO	R	R	0	1	Lisa	Mother	mot	0	0	0
MAH00763	20131022	07:24	00:05:55	Lois	Infant	3	NA	NA	M	D-M	Full-Partial	16	12	1	04:33	04:37	00:18	1	4	5	1.25	right	switch	1	R	R	R	0	1	Lisa	Mother	mot	0	0	0
MAH00763	20131022	07:24	00:05:55	Lois	Infant	3	NA	NA	M	D-M	Full-Partial	16	13	1	4:45*	04:46	00:08	1	NA	NA	NA	left	NA	NA	R	R	R	0	1	Lisa	Mother	mot	0	0	0
MAH00763	20131022	07:24	00:05:55	Lois	Infant	3	NA	NA	M	D-M	Full-Partial	16	14	1	04:47	04:48	00:01	0	1	1	1	left	body	1	R	R	R	0	1	Lisa	Mother	mot	0	0	0
MAH00763	20131022	07:24	00:05:55	Lois	Infant	3	NA	NA	M	D-M	Full-Partial	16	15	1	04:51	04:53	00:03	1	2	2	1	left	body	1	R	R	R	0	1	Lisa	Mother	mot	0	0	0
MAH00763	20131022	07:24	00:05:55	Lois	Infant	3	NA	NA	M	D-M	Full-Partial	16	16	1	04:56	05:08	00:03	1	12	18	1.5	left	body	1	R	R	M	1	1	Lisa	Mother	mot	1	0	0
MAH00764	20131022	07:27	00:01:58	Lisa	Mother	NA	36	2	F	A-F	Full	2	1	1	0:00*	00:00	NA	0	NA	4	NA	left	limbs	1	F	R	M	1	1	Lois	Infant	off	0	0	1
MAH00764	20131022	07:27	00:01:58	Lisa	Mother	NA	36	2	F	A-F	Full	2	2	1	0:31*	00:43	00:31	0	12	16	1.333333333	right	switch	1	M	R	F	0	1	Lois	Infant	off	1	0	1
MAH00764	20131022	07:27	00:01:58	Lois	Infant	3	NA	NA	M	D-M	Full-Partial	5	1	1	01:26	01:34	NA	0	8	12	1.5	left	switch	1	M	R	GS?	0	1	Lisa	Mother	mot	1	0	0
MAH00764	20131022	07:27	00:01:58	Lois	Infant	3	NA	NA	M	D-M	Full-Partial	5	2	1	01:34	01:34	00:00	0	1	1	1	left	head	0	GS?	GS?	GS?	0	1	Lisa	Mother	mot	1	0	0
MAH00764	20131022	07:27	00:01:58	Lois	Infant	3	NA	NA	M	D-M	Full-Partial	5	3	1	01:36	01:37	00:02	1	1	2	2	left	head	0	GS?	GS?	GS?	0	1	Lisa	Mother	mot	1	0	0
MAH00764	20131022	07:27	00:01:58	Lois	Infant	3	NA	NA	M	D-M	Full-Partial	5	4	1	01:39	01:40	00:02	1	1	1	1	left	head	0	GS?	GS?	GS?	0	1	Lisa	Mother	mot	1	0	0
MAH00764	20131022	07:27	00:01:58	Lois	Infant	3	NA	NA	M	D-M	Full-Partial	5	5	1	01:41	01:43	00:01	0	1.5	2	1.333333333	left	head	0	GS?	GS?	M	1	1	Lisa	Mother	mot	1	0	0
MAH00765	20131022	07:32	00:05:00	Lois	Infant	3	NA	NA	M	D-M	Full-Partial	1	1	0	02:15	02:23	NA	0	8	10	1.25	left	head	0	Tantrum	R	Tantrum	0	1	Lisa	Mother	mot	1	0	0
MAH00768	20131022	07:43	00:00:30	Lois	Infant	3	NA	NA	M	D-M	Full-Partial	1	1	0	0:00*	00:05	NA	0	5	8	1.6	left	body	1	?	R	M	1	1	Lisa	Mother	mot	1	0	0
MAH00769	20131022	07:57	00:00:26	Lisa	Mother	NA	36	2	F	A-F	Full	1	1	0	0:00*	0:00*	NA	NA	NA	11	NA	right	body	1	F	R	F	0	1	Lois	Infant	off	0	0	0
MAH00770	20131022	08:17	00:02:06	Lisa	Mother	NA	36	2	F	A-F	Full	1	1	0	00:29	00:42	NA	0	13	17	1.307692308	right	body	1	R	R	R	0	1	Lois	Infant	off	0	1	0
MAH00772	20131022	08:26	00:01:31	Lisa	Mother	NA	36	2	F	A-F	Full	1	1	0	00:52	00:59	NA	0	7	10	1.428571429	object	limbs	1	M	R	M	1	1	Lois	Infant	off	0	0	0
MAH00772	20131022	08:26	00:01:31	Lois	Infant	3	NA	NA	M	D-M	Full-Partial	2	1	1	00:56	00:59	NA	0	3	4	1.333333333	left	limbs	1	D	R	R	0	1	Lisa	Mother	mot	0	0	0
MAH00772	20131022	08:26	00:01:31	Lois	Infant	3	NA	NA	M	D-M	Full-Partial	2	2	1	01:00	01:07	00:01	0	7	10	1.428571429	left	limbs	1	R	R	M	1	1	Lisa	Mother	mot	0	0	0
MAH00773	20131022	08:28	00:00:24	Lisa	Mother	NA	36	2	F	A-F	Full	1	1	0	0:00*	0:00*	NA	NA	NA	4	NA	right	limbs	1	M?	Bridge	M	1	1	Lois	Infant	off	0	1	1
MAH00776	20131022	08:45	00:01:04	Lisa	Mother	NA	36	2	F	A-F	Full	3	1	1	0:00*	00:04	NA	0	4.5	9	2	left	head	0	F	F	F	0	1	Lois	Infant	off	0	0	0
MAH00776	20131022	08:45	00:01:04	Lisa	Mother	NA	36	2	F	A-F	Full	3	2	1	00:05	00:08	00:01	0	3	6	2	left	head	0	F	F	F	0	1	Lois	Infant	off	0	0	0
MAH00776	20131022	08:45	00:01:04	Lisa	Mother	NA	36	2	F	A-F	Full	3	3	1	00:08	00:17	00:00	0	9	22	2.444444444	left	head	0	F	F	F	0	1	Lois	Infant	off	0	0	0
MAH00778	20131022	09:02	00:04:24	Lisa	Mother	NA	36	2	F	A-F	Full	7	1	1	00:07	00:18	NA	0	11	13	1.181818182	right	body	1	M	R	R	0	1	Lois	Infant	off	1	0	0
MAH00778	20131022	09:02	00:04:24	Lisa	Mother	NA	36	2	F	A-F	Full	7	2	1	00:29	00:34	00:11	1	5	7	1.4	right	switch	1	R	R	R	0	1	Lois	Infant	off	0	0	0
MAH00778	20131022	09:02	00:04:24	Lisa	Mother	NA	36	2	F	A-F	Full	7	3	1	00:35	00:45	00:01	0	10	15	1.5	right	limbs	1	R	R	M*	1	1	Lois	Infant	off	1	0	0
MAH00778	20131022	09:02	00:04:24	Lisa	Mother	NA	36	2	F	A-F	Full	7	4	1	01:06	01:14	00:21	1	8	11	1.375	right	body	1	R	R	R	0	1	Lois	Infant	off	1	0	0
MAH00778	20131022	09:02	00:04:24	Lisa	Mother	NA	36	2	F	A-F	Full	7	5	1	01:29	01:35	00:15	1	6	8	1.333333333	left	body	1	R	R	R	0	1	Lois	Infant	off	0	0	0
MAH00778	20131022	09:02	00:04:24	Lisa	Mother	NA	36	2	F	A-F	Full	7	6	1	01:35	01:50	00:00	0	15	19	1.266666667	left	body	1	R	R	R	0	1	Lois	Infant	off	0	0	0
MAH00778	20131022	09:02	00:04:24	Lisa	Mother	NA	36	2	F	A-F	Full	7	7	1	01:50	02:09	00:00	0	19	22	1.157894737	left	body	1	R	R	M	1	1	Lois	Infant	off	0	0	0
MAH00779	20131022	09:11	00:04:36	Lois	Infant	3	NA	NA	M	D-M	Full-Partial	1	1	0	02:36	02:47	NA	0	11	15	1.363636364	left	body	1	R	R	M	1	1	Lisa	Mother	mot	1	0	0
MAH00779	20131022	09:11	00:04:36	Lisa	Mother	NA	36	2	F	A-F	Full	1	1	0	3:48*	04:00	NA	0	12	18	1.5	left	body	1	F	Bridge	M	1	1	Lois	Infant	off	1	1	1
MAH00780	20131022	09:14	00:00:47	Lois	Infant	3	NA	NA	M	D-M	Full-Partial	1	1	0	00:11	00:16	NA	0	5	10	2	left	body	1	R	R	M	1	1	Lisa	Mother	mot	0	0	0
MAH00782	20131022	09:33	00:01:10	Lisa	Mother	NA	36	2	F	A-F	Full	2	1	1	0:00*	00:01	NA	0	1.5	3	2	left	head	0	F-Ins	F-Ins	F-Ins	0	1	Lois	Infant	off	0	0	0
MAH00782	20131022	09:33	00:01:10	Lisa	Mother	NA	36	2	F	A-F	Full	2	2	1	00:07	00:13	00:06	1	6	9	1.5	left	head	0	F-Ins	F-Ins	F-Ins	0	1	Lois	Infant	off	0	0	0
MAH00785	20131022	09:46	00:00:49	Lisa	Mother	NA	36	2	F	A-F	Full	1	1	0	0:00*	00:01	NA	0	2	4	2	left	head	0	R?	R	M*	1	1	Lois	Infant	off	0	0	0
MAH00787	20131022	09:48	00:01:00	Lisa	Mother	NA	36	2	F	A-F	Full	1	1	0	0:00*	0:00*	NA	NA	1	1	1	NA	head	0	M	R	R	0	1	Lois	Infant	off	0	0	0
MAH00789	20131022	10:39	00:12:47	Lois	Infant	3	NA	NA	M	D-M	Full-Partial	6	1	1	03:22	03:46	NA	0	24	36	1.5	left	limbs	1	M	R	M	1	1	Lisa	Mother	mot	0	0	0
MAH00789	20131022	10:39	00:12:47	Lois	Infant	3	NA	NA	M	D-M	Full-Partial	6	2	1	10:12	10:23	06:26	0	11	16	1.454545455	left	limbs	1	TF	TF	TF	0	1	Lisa	Mother	mot	0	1	0
MAH00789	20131022	10:39	00:12:47	Lois	Infant	3	NA	NA	M	D-M	Full-Partial	6	3	1	10:54	10:55	00:31	0	1	1	1	left	head	0	TF	TF	TF	0	1	Lisa	Mother	mot	0	1	0
MAH00789	20131022	10:39	00:12:47	Lois	Infant	3	NA	NA	M	D-M	Full-Partial	6	4	1	11:05	11:05	00:10	1	1	1	1	left	head	0	TF	TF	TF	0	1	Lisa	Mother	mot	0	1	0
MAH00789	20131022	10:39	00:12:47	Lois	Infant	3	NA	NA	M	D-M	Full-Partial	6	5	1	11:14	11:17	00:09	1	3	4	1.333333333	left	head	0	TF	TF	TF	0	1	Lisa	Mother	mot	0	1	0
MAH00789	20131022	10:39	00:12:47	Lois	Infant	3	NA	NA	M	D-M	Full-Partial	6	6	1	12:00	12:13	00:43	0	13	24	1.846153846	left	switch	1	M	R	Nest	0	1	Lisa	Mother	mot	0	0	0
MAH00789	20131022	10:39	00:12:47	Lisa	Mother	NA	36	2	F	A-F	Full	1	1	0	05:30	05:30	NA	0	1	1	1	left	head	0	F	F	F	0	0	Lois	Infant	off	NA	NA	NA
MAH00790	20131022	10:48	00:00:47	Lisa	Mother	NA	36	2	F	A-F	Full	1	1	0	00:19	00:23	NA	0	4	6	1.5	left	limbs	1	M	Bridge	M	1	1	Lois	Infant	off	0	0	1
MAH00794	20131022	11:01	00:04:00	Lisa	Mother	NA	36	2	F	A-F	Full	1	1	0	0:00*	00:09	NA	0	9	16	1.777777778	right	body	1	M	R	M	1	1	Lois	Infant	off	0	0	1
MAH00795	20131022	11:15	00:08:01	Lois	Infant	3	NA	NA	M	D-M	Full-Partial	6	1	1	0:00*	00:05	NA	0	5	8	1.6	left	limbs	1	R?	R?	APO	0	1	Lisa	Mother	mot	1	0	0
MAH00795	20131022	11:15	00:08:01	Lois	Infant	3	NA	NA	M	D-M	Full-Partial	6	2	1	01:21	01:23	01:16	0	2	3	1.5	object	limbs	1	APO	EXP?	EXP?	0	1	Lisa	Mother	mot	1	1	0
MAH00795	20131022	11:15	00:08:01	Lois	Infant	3	NA	NA	M	D-M	Full-Partial	6	3	1	01:25	01:29	00:02	1	4	7	1.75	left	body	1	EXP?	Peer	M*	1	1	Lisa	Mother	mot	1	1	0
MAH00795	20131022	11:15	00:08:01	Lois	Infant	3	NA	NA	M	D-M	Full-Partial	6	4	1	03:03	03:05	01:34	0	1.5	3	2	object	limbs	1	TF	TF	TF	0	1	Lisa	Mother	mot	1	1	0
MAH00795	20131022	11:15	00:08:01	Lois	Infant	3	NA	NA	M	D-M	Full-Partial	6	5	1	03:57	04:01	00:52	0	4	4	1	object	limbs	1	TF	TF	TF	0	1	Lisa	Mother	mot	1	1	0
MAH00795	20131022	11:15	00:08:01	Lois	Infant	3	NA	NA	M	D-M	Full-Partial	6	6	1	04:16	04:21	00:15	1	5	8	1.6	left	head	0	TF	TF	TF	0	1	Lisa	Mother	mot	1	1	0
MAH00795	20131022	11:15	00:08:01	Lisa	Mother	NA	36	2	F	A-F	Full	2	1	1	02:08	02:08	NA	0	1	1	1	right	head	0	F	F	F	0	1	Lois	Infant	off	1	1	0
MAH00795	20131022	11:15	00:08:01	Lisa	Mother	NA	36	2	F	A-F	Full	2	2	1	06:05	06:12	03:57	0	7	8	1.142857143	left	head	0	F	F	F	0	1	Lois	Infant	off	1	1	0
MAH00796	20131022	11:18	00:02:01	Lisa	Mother	NA	36	2	F	A-F	Full	3	1	1	00:45	00:49	NA	0	4	5	1.25	left	limbs	1	Bridge	Bridge	Bridge	1	1	Lois	Infant	off	1	1	0
MAH00796	20131022	11:18	00:02:01	Lisa	Mother	NA	36	2	F	A-F	Full	3	2	1	00:49	00:51	00:00	0	2.5	4	1.6	left	head	0	Bridge	Bridge	GS?	0	1	Lois	Infant	off	1	1	0
MAH00796	20131022	11:18	00:02:01	Lisa	Mother	NA	36	2	F	A-F	Full	3	3	1	01:11	01:16	00:20	1	5	5	1	left	body	1	Bridge	Bridge	Retrieve	1	1	Lois	Infant	off	1	1	0
MAH00797	20131022	11:34	00:05:48	Lisa	Mother	NA	36	2	F	A-F	Full	13	1	1	0:00*	00:02	NA	0	2	3	1.5	left	body	1	R	R	R?	0	1	Lois	Infant	off	1	1	0
MAH00797	20131022	11:34	00:05:48	Lisa	Mother	NA	36	2	F	A-F	Full	13	2	1	01:30	01:32	01:28	0	1.5	2	1.333333333	left	limbs	1	R	GS	GS	0	1	Lois	Infant	off	0	1	0
MAH00797	20131022	11:34	00:05:48	Lisa	Mother	NA	36	2	F	A-F	Full	13	3	1	01:33	01:35	00:01	0	1.5	2	1.333333333	left	limbs	1	GS	GS	R	0	1	Lois	Infant	off	0	1	0
MAH00797	20131022	11:34	00:05:48	Lisa	Mother	NA	36	2	F	A-F	Full	13	4	1	02:00	02:10	00:25	1	10	8	0.8	right	body	1	R	R	GS	0	1	Lois	Infant	off	0	1	0
MAH00797	20131022	11:34	00:05:48	Lisa	Mother	NA	36	2	F	A-F	Full	13	5	1	02:12	02:17	00:02	1	5	7	1.4	left	limbs	1	GS	GS	GS	0	1	Lois	Infant	off	0	1	0
MAH00797	20131022	11:34	00:05:48	Lisa	Mother	NA	36	2	F	A-F	Full	13	6	1	02:18	02:24	00:01	0	6	5	0.833333333	left	limbs	1	GS	GS	GS	0	1	Lois	Infant	off	0	1	0
MAH00797	20131022	11:34	00:05:48	Lisa	Mother	NA	36	2	F	A-F	Full	13	7	1	02:35	02:36	00:11	1	1	2	2	left	body	1	GS	GS	GS	0	1	Lois	Infant	off	0	1	0
MAH00797	20131022	11:34	00:05:48	Lisa	Mother	NA	36	2	F	A-F	Full	13	8	1	02:38	02:42	00:02	1	4	4	1	right	limbs	1	GS	GS	GS	0	1	Lois	Infant	off	0	1	0
MAH00797	20131022	11:34	00:05:48	Lisa	Mother	NA	36	2	F	A-F	Full	13	9	1	02:50	02:55	00:08	1	5	4	0.8	right	limbs	1	GS	GS	GS	0	1	Lois	Infant	off	0	1	0
MAH00797	20131022	11:34	00:05:48	Lisa	Mother	NA	36	2	F	A-F	Full	13	10	1	03:21	03:23	00:26	1	2	3	1.5	left	body	1	GS	GS	GS	0	1	Lois	Infant	off	0	1	0
MAH00797	20131022	11:34	00:05:48	Lisa	Mother	NA	36	2	F	A-F	Full	13	11	1	03:25	03:25	00:02	1	1	1	1	left	limbs	1	GS	R	R	0	1	Lois	Infant	off	0	1	0
MAH00797	20131022	11:34	00:05:48	Lisa	Mother	NA	36	2	F	A-F	Full	13	12	1	04:34	04:43	01:09	0	9	12	1.333333333	left	limbs	1	R	R	R	0	1	Lois	Infant	off	0	0	0
MAH00797	20131022	11:34	00:05:48	Lisa	Mother	NA	36	2	F	A-F	Full	13	13	1	04:43	04:50	00:00	0	7	9	1.285714286	left	limbs	1	R	R	M	1	1	Lois	Infant	off	0	0	1
MAH00797	20131022	11:34	00:05:48	Lois	Infant	3	NA	NA	M	D-M	Full-Partial	1	1	0	02:03	02:14	NA	0	11	16	1.454545455	left	head	0	APM	R	R	0	1	Lisa	Mother	mot	1	0	0
MAH00797	20131022	11:34	00:05:48	Lois	Infant	3	NA	NA	M	D-M	Full-Partial	1	1	0	04:16	04:23	02:02	0	7	11	1.571428571	right	head	0	GR	R	R	0	1	Lisa	Mother	mot	1	0	0
MAH00798	20131022	11:36	00:00:32	Lisa	Mother	NA	36	2	F	A-F	Full	2	1	1	0:00*	0:00*	NA	NA	NA	3	NA	left	limbs	1	M	R	R	0	1	Lois	Infant	off	0	0	0
MAH00798	20131022	11:36	00:00:32	Lisa	Mother	NA	36	2	F	A-F	Full	2	2	1	0:00*	00:01	00:01	0	1.5	3	2	left	body	1	R	R	M	1	1	Lois	Infant	off	0	0	0
MAH00799	20131022	11:54	00:01:08	Lisa	Mother	NA	36	2	F	A-F	Full	1	1	0	0:00*	0:00*	NA	NA	NA	9	NA	NA	NA	NA	M	R	M	1	1	Lois	Infant	off	0	1	1
MAH00800	20131022	12:08	00:00:14	Lisa	Mother	NA	36	2	F	A-F	Full	1	1	0	0:00*	0:00*	NA	NA	NA	7	NA	NA	NA	NA	F	F	F	0	1	Lois	Infant	off	0	0	0
MAH00801	20131022	12:22	00:03:43	Lisa	Mother	NA	36	2	F	A-F	Full	3	1	1	0:00*	00:06	NA	0	6	8	1.333333333	right	body	1	F	R	F	0	1	Lois	Infant	off	0	0	0
MAH00801	20131022	12:22	00:03:43	Lisa	Mother	NA	36	2	F	A-F	Full	3	2	1	1:35*	01:41	01:29	0	6	7	1.166666667	right	body	1	F	R	R	0	1	Lois	Infant	off	0	0	0
MAH00801	20131022	12:22	00:03:43	Lisa	Mother	NA	36	2	F	A-F	Full	3	3	1	01:42	01:45	00:01	0	3	4	1.333333333	right	body	1	R	R	F?	0	1	Lois	Infant	off	0	0	0
MAH00805	20131022	12:33	00:01:18	Lisa	Mother	NA	36	2	F	A-F	Full	1	1	0	0:00*	00:09	NA	0	NA	17	NA	left	head	0	F	R	M	1	1	Lois	Infant	off	0	1	1
MAH00807	20131022	12:46	00:05:00	Lois	Infant	3	NA	NA	M	D-M	Full-Partial	1	1	0	0:00*	00:02	NA	0	2	3	1.5	right	head	0	?	APM	APM	0	1	Lisa	Mother	mot	1	0	0
MAH00810	20131022	13:36	00:05:25	Lois	Infant	3	NA	NA	M	D-M	Full-Partial	1	1	0	0:00*	00:03	NA	0	NA	14	NA	right	body	1	?	R	M	1	1	Lisa	Mother	mot	0	0	0
MAH00811	20131022	13:54	00:04:26	Lois	Infant	3	NA	NA	M	D-M	Full-Partial	11	1	1	0:00*	00:03	NA	0	3	4	1.333333333	left	body	1	?	R	R	0	1	Lisa	Mother	mot	0	0	0
MAH00811	20131022	13:54	00:04:26	Lois	Infant	3	NA	NA	M	D-M	Full-Partial	11	2	1	00:35	00:49	00:32	0	14	24	1.714285714	right	limbs	1	R	R	APO	0	1	Lisa	Mother	mot	1	0	0
MAH00811	20131022	13:54	00:04:26	Lois	Infant	3	NA	NA	M	D-M	Full-Partial	11	3	1	01:15	01:24	00:26	1	9	12	1.333333333	right	limbs	1	APO	R	R	0	1	Lisa	Mother	mot	1	0	0
MAH00811	20131022	13:54	00:04:26	Lois	Infant	3	NA	NA	M	D-M	Full-Partial	11	4	1	01:48	01:57	00:24	1	9	12	1.333333333	object	limbs	1	R	R	R	0	1	Lisa	Mother	mot	1	0	0
MAH00811	20131022	13:54	00:04:26	Lois	Infant	3	NA	NA	M	D-M	Full-Partial	11	5	1	02:00	02:03	00:03	1	3	5	1.666666667	object	limbs	1	R	R	R	0	1	Lisa	Mother	mot	1	0	0
MAH00811	20131022	13:54	00:04:26	Lois	Infant	3	NA	NA	M	D-M	Full-Partial	11	6	1	02:10	02:17	00:07	1	7	7	1	right	head	0	R	R	R	0	1	Lisa	Mother	mot	1	0	0
MAH00811	20131022	13:54	00:04:26	Lois	Infant	3	NA	NA	M	D-M	Full-Partial	11	7	1	02:20	02:21	00:03	1	1	1	1	right	head	0	R	R	R	0	1	Lisa	Mother	mot	1	0	0
MAH00811	20131022	13:54	00:04:26	Lois	Infant	3	NA	NA	M	D-M	Full-Partial	11	8	1	02:30	02:31	00:09	1	1	1	1	right	limbs	1	R	R	R	0	1	Lisa	Mother	mot	0	0	0
MAH00811	20131022	13:54	00:04:26	Lois	Infant	3	NA	NA	M	D-M	Full-Partial	11	9	1	02:33	02:34	00:02	1	1	1	1	right	head	0	R	R	APO	0	1	Lisa	Mother	mot	0	0	0
MAH00811	20131022	13:54	00:04:26	Lois	Infant	3	NA	NA	M	D-M	Full-Partial	11	10	1	03:01	03:10	00:27	1	9	13	1.444444444	right	limbs	1	APO	R	R	0	1	Lisa	Mother	mot	1	0	0
MAH00811	20131022	13:54	00:04:26	Lois	Infant	3	NA	NA	M	D-M	Full-Partial	11	11	1	03:19	03:29	00:09	1	10	13	1.3	right	head	0	R	R	R	0	1	Lisa	Mother	mot	1	0	0
MAH00814	20131022	14:09	00:00:34	Lois	Infant	3	NA	NA	M	D-M	Full-Partial	1	1	0	0:00*	00:05	NA	0	5	8	1.6	right	limbs	1	APM	R	APM	0	1	Lisa	Mother	mot	0	0	0
MAH00826	20131024	06:01	00:01:27	Lisa	Mother	NA	36	2	F	A-F	Full	2	1	1	0:00*	0:00*	NA	NA	NA	7	NA	NA	NA	NA	Rs	R	R	0	1	Lois	Infant	off	0	0	0
MAH00826	20131024	06:01	00:01:27	Lisa	Mother	NA	36	2	F	A-F	Full	2	2	1	0:00*	0:00*	NA	NA	NA	5	NA	NA	NA	NA	R	R	M	1	1	Lois	Infant	off	0	0	0
MAH00826	20131024	06:01	00:01:27	Lois	Infant	3	NA	NA	M	D-M	Full-Partial	1	1	0	00:57	01:05	NA	0	8	16	2	right	limbs	1	M	R	M	1	1	Lisa	Mother	mot	1	0	0
MAH00829	20131024	06:43	00:03:15	Lois	Infant	3	NA	NA	M	D-M	Full-Partial	1	1	0	02:00	02:19	NA	0	19	33	1.736842105	left	switch	1	M*	R	M	1	1	Lisa	Mother	mot	1	NA	1
MAH00832	20131024	06:59	00:00:50	Lisa	Mother	NA	36	2	F	A-F	Full	1	1	0	00:04	00:08	NA	0	4	5	1.25	left	head	0	M?	Bridge	Bridge	1	1	Lois	Infant	off	0	1	1
MAH00836	20131024	07:32	00:02:01	Lisa	Mother	NA	36	2	F	A-F	Full	1	1	0	0:00*	0:00*	NA	NA	NA	9	NA	right	NA	NA	F?	Bridge	M	1	1	Lois	Infant	off	0	NA	1
MAH00837	20131024	07:45	00:00:35	Lois	Infant	3	NA	NA	M	D-M	Full-Partial	1	1	0	0:00*	00:05	NA	0	5	7	1.4	left	body	1	?	R	M	1	1	Lisa	Mother	mot	1	0	0
MAH00838	20131024	07:56	00:01:11	Lisa	Mother	NA	36	2	F	A-F	Full	3	1	1	0:00*	00:11	NA	0	11	13	1.181818182	right	body	1	?	R	R	0	1	Lois	Infant	off	1	1	1
MAH00838	20131024	07:56	00:01:11	Lisa	Mother	NA	36	2	F	A-F	Full	3	2	1	00:15	00:22	00:04	1	7	9	1.285714286	right	body	1	R	R	R	0	1	Lois	Infant	off	0	1	0
MAH00838	20131024	07:56	00:01:11	Lisa	Mother	NA	36	2	F	A-F	Full	3	3	1	00:28	00:36	00:06	1	8	9	1.125	right	limbs	1	R	R	M*	1	1	Lois	Infant	off	0	1	1
MAH00839	20131024	08:17	00:01:31	Lisa	Mother	NA	36	2	F	A-F	Full	1	1	0	0:00*	00:05	NA	0	5	6	1.2	right	body	1	F?	R	M*	1	1	Lois	Infant	off	0	0	0
MAH00843	20131024	08:24	00:01:51	Lisa	Mother	NA	36	2	F	A-F	Full	1	1	0	00:57	01:05	NA	0	8	10	1.25	left	limbs	1	M	R	M	1	1	Lois	Infant	off	1	0	0
MAH00846	20131024	08:33	00:04:20	Lisa	Mother	NA	36	2	F	A-F	Full	2	1	1	00:23	00:32	NA	0	9	14	1.555555556	left	head	0	R	R	M	1	1	Lois	Infant	off	1	1	0
MAH00846	20131024	08:33	00:04:20	Lisa	Mother	NA	36	2	F	A-F	Full	2	2	1	03:01	03:06	02:29	0	5	7	1.4	left	head	0	F	F	F	0	1	Lois	Infant	off	0	NA	0
MAH00849	20131024	08:42	00:01:12	Lisa	Mother	NA	36	2	F	A-F	Full	1	1	0	0:00*	00:06	NA	0	6	7	1.166666667	left	switch	1	F-Ins	R	M	1	0	Lois	Infant	off	NA	NA	NA
MAH00852	20131024	08:52	00:01:09	Lois	Infant	3	NA	NA	M	D-M	Full-Partial	1	1	0	00:09	00:14	NA	0	5	5	1	left	body	1	APM	R	TF	0	1	Lisa	Mother	mot	0	0	0
MAH00854	20131024	09:00	00:02:09	Lisa	Mother	NA	36	2	F	A-F	Full	1	1	0	1:45*	01:50	NA	0	5	7	1.4	right	head	0	Bridge	Bridge	M	1	1	Lois	Infant	off	0	0	0
MAH00855	20131024	09:04	00:00:13	Lois	Infant	3	NA	NA	M	D-M	Full-Partial	1	1	0	0:00*	0:00*	NA	NA	NA	NA	NA	left	body	1	D?	R	M?	1	1	Lisa	Mother	mot	0	0	0
MAH00856	20131024	09:08	00:03:27	Lisa	Mother	NA	36	2	F	A-F	Full	2	1	1	0:00*	00:00	NA	0	NA	6	NA	right	body	1	Bridge	Bridge	Bridge	1	1	Lois	Infant	off	1	1	0
MAH00856	20131024	09:08	00:03:27	Lisa	Mother	NA	36	2	F	A-F	Full	2	2	1	00:01	00:05	00:01	0	4	5	1.25	right	body	1	Bridge	Bridge	M*	1	1	Lois	Infant	off	1	0	0
MAH00857	20131024	09:11	00:02:19	Lois	Infant	3	NA	NA	M	D-M	Full-Partial	2	1	1	01:03	01:07	NA	0	4	6	1.5	left	limbs	1	APM	R	APM	0	1	Lisa	Mother	mot	1	0	0
MAH00857	20131024	09:11	00:02:19	Lois	Infant	3	NA	NA	M	D-M	Full-Partial	2	2	1	01:38	01:44	00:31	0	6	7	1.166666667	left	head	0	APM	R	APM	0	1	Lisa	Mother	mot	1	0	0
MAH00859	20131024	09:14	00:00:30	Lisa	Mother	NA	36	2	F	A-F	Full	1	1	0	0:00*	00:03	NA	0	3	5	1.666666667	right	head	0	F-Ins	R	F-Ins	0	1	Lois	Infant	off	0	NA	0
MAH00860	20131024	09:17	00:00:36	Lisa	Mother	NA	36	2	F	A-F	Full	1	1	0	0:00*	0:00*	NA	NA	NA	NA	NA	left	body	1	F-Ins	R	F-Ins	0	1	Lois	Infant	off	0	NA	0
MAH00862	20131024	09:22	00:01:50	Lisa	Mother	NA	36	2	F	A-F	Full	5	1	1	0:00*	00:04	NA	0	4	5	1.25	right	switch	1	F-Ins	R	R	0	1	Lois	Infant	off	0	NA	0
MAH00862	20131024	09:22	00:01:50	Lisa	Mother	NA	36	2	F	A-F	Full	5	2	1	00:04	00:07	00:00	0	3	5	1.666666667	right	switch	1	R	R	R	0	1	Lois	Infant	off	0	NA	0
MAH00862	20131024	09:22	00:01:50	Lisa	Mother	NA	36	2	F	A-F	Full	5	3	1	00:07	00:10	00:00	0	3	3	1	right	switch	1	R	R	M	1	1	Lois	Infant	off	0	NA	0
MAH00862	20131024	09:22	00:01:50	Lisa	Mother	NA	36	2	F	A-F	Full	5	4	1	00:28	00:31	00:18	1	3	4	1.333333333	right	body	1	M	R	R	0	1	Lois	Infant	off	0	NA	0
MAH00862	20131024	09:22	00:01:50	Lisa	Mother	NA	36	2	F	A-F	Full	5	5	1	00:38	00:50	00:07	1	12	16	1.333333333	right	limbs	1	R	R	M	1	1	Lois	Infant	off	0	NA	1
MAH00863	20131024	09:26	00:00:36	Lisa	Mother	NA	36	2	F	A-F	Full	2	1	1	0:00*	00:09	NA	0	9	10	1.111111111	left	limbs	1	M?	Bridge	Bridge	1	1	Lois	Infant	off	0	1	1
MAH00863	20131024	09:26	00:00:36	Lisa	Mother	NA	36	2	F	A-F	Full	2	2	1	00:10	00:11	00:01	0	1	2	2	left	head	0	Bridge	Bridge	M	1	1	Lois	Infant	off	0	1	1
MAH00865	20131024	09:55	00:00:41	Lisa	Mother	NA	36	2	F	A-F	Full	1	1	0	0:00*	0:00*	NA	NA	NA	NA	NA	left	head	0	F	R	F	0	1	Lois	Infant	off	0	NA	0
MAH00866	20131024	10:04	00:06:31	Lisa	Mother	NA	36	2	F	A-F	Full	14	1	1	0:00*	00:01	NA	0	NA	5	NA	right	limbs	1	F	F	F	0	1	Lois	Infant	off	0	NA	0
MAH00866	20131024	10:04	00:06:31	Lisa	Mother	NA	36	2	F	A-F	Full	14	2	1	00:01	00:01	00:00	0	1	1	1	left	head	0	F	F	F	0	1	Lois	Infant	off	0	NA	0
MAH00866	20131024	10:04	00:06:31	Lisa	Mother	NA	36	2	F	A-F	Full	14	3	1	00:55	01:00	00:54	0	5	5	1	left	body	1	F	R	R	0	1	Lois	Infant	off	0	NA	0
MAH00866	20131024	10:04	00:06:31	Lisa	Mother	NA	36	2	F	A-F	Full	14	4	1	01:01	01:07	00:01	0	6	9	1.5	left	switch	1	R	R	R	0	1	Lois	Infant	off	0	NA	0
MAH00866	20131024	10:04	00:06:31	Lisa	Mother	NA	36	2	F	A-F	Full	14	5	1	01:07	01:14	00:00	0	7	9	1.285714286	left	switch	1	R	R	R	0	1	Lois	Infant	off	0	NA	0
MAH00866	20131024	10:04	00:06:31	Lisa	Mother	NA	36	2	F	A-F	Full	14	6	1	01:14	01:15	00:00	0	1	2	2	left	head	0	R	R	R	0	1	Lois	Infant	off	0	NA	0
MAH00866	20131024	10:04	00:06:31	Lisa	Mother	NA	36	2	F	A-F	Full	14	7	1	01:15	01:16	00:00	0	1	2	2	left	head	0	R	R	R	0	1	Lois	Infant	off	0	NA	0
MAH00866	20131024	10:04	00:06:31	Lisa	Mother	NA	36	2	F	A-F	Full	14	8	1	01:17	01:21	00:01	0	4	8	2	left	head	0	R	R	R	0	1	Lois	Infant	off	0	0	0
MAH00866	20131024	10:04	00:06:31	Lisa	Mother	NA	36	2	F	A-F	Full	14	9	1	01:21	01:32	00:00	0	11	20	1.818181818	left	head	0	R	R	R	0	1	Lois	Infant	off	0	0	0
MAH00866	20131024	10:04	00:06:31	Lisa	Mother	NA	36	2	F	A-F	Full	14	10	1	01:33	01:35	00:01	0	2	3	1.5	left	body	1	R	R	R	0	1	Lois	Infant	off	0	0	0
MAH00866	20131024	10:04	00:06:31	Lisa	Mother	NA	36	2	F	A-F	Full	14	11	1	02:19	02:25	00:44	0	6	8	1.333333333	right	switch	1	M*	R	F?	0	1	Lois	Infant	off	0	0	0
MAH00866	20131024	10:04	00:06:31	Lisa	Mother	NA	36	2	F	A-F	Full	14	12	1	03:00	03:03	00:35	0	3	4	1.333333333	left	NA	NA	F?	F?	F?	0	1	Lois	Infant	off	0	0	0
MAH00866	20131024	10:04	00:06:31	Lisa	Mother	NA	36	2	F	A-F	Full	14	13	1	04:21	04:23	01:18	0	2	3	1.5	NA	NA	NA	?	?	?	NA	1	Lois	Infant	off	0	0	0
MAH00866	20131024	10:04	00:06:31	Lisa	Mother	NA	36	2	F	A-F	Full	14	14	1	04:38	04:42	00:15	1	4	6	1.5	NA	NA	NA	?	?	?	NA	1	Lois	Infant	off	0	0	0
MAH00866	20131024	10:04	00:06:31	Lois	Infant	3	NA	NA	M	D-M	Full-Partial	2	1	1	02:02	02:05	NA	0	3	4	1.333333333	right	limbs	1	TF	R	TF	0	1	Lisa	Mother	mot	0	0	0
MAH00866	20131024	10:04	00:06:31	Lois	Infant	3	NA	NA	M	D-M	Full-Partial	2	2	1	05:03	05:08	02:58	0	5	8	1.6	left	limbs	1	M*	R	M*	1	1	Lisa	Mother	mot	0	0	0
MAH00869	20131024	10:24	00:02:32	Lisa	Mother	NA	36	2	F	A-F	Full	1	1	0	00:49	00:49	NA	0	1	1	1	left	head	0	F	F	F	0	1	Lois	Infant	off	0	NA	1
MAH00870	20131024	10:39	00:00:31	Lisa	Mother	NA	36	2	F	A-F	Full	1	1	0	0:00*	00:00	NA	0	NA	3	NA	left	body	1	F-Ins	F-Ins	F-Ins	0	1	Lois	Infant	off	0	NA	0
MAH00871	20131024	10:40	00:00:14	Lisa	Mother	NA	36	2	F	A-F	Full	1	1	0	0:00*	0:00*	NA	NA	1	2	2	left	body	1	F-Ins	F-Ins	F-Ins	0	1	Lois	Infant	off	0	NA	0
MAH00872	20131024	10:41	00:00:40	Lisa	Mother	NA	36	2	F	A-F	Full	2	1	1	0:00*	00:01	NA	0	1.5	3	2	left	body	1	F-Ins	F-Ins	F-Ins	0	1	Lois	Infant	off	0	NA	0
MAH00872	20131024	10:41	00:00:40	Lisa	Mother	NA	36	2	F	A-F	Full	2	2	1	00:04	00:13	00:03	1	9	11	1.222222222	left	limbs	1	F-Ins	R	F-Ins	0	1	Lois	Infant	off	0	NA	0
MAH00873	20131024	10:47	00:04:43	Lisa	Mother	NA	36	2	F	A-F	Full	5	1	1	0:00*	0:00*	NA	NA	NA	3	NA	left	head	0	F-Ins	R	R	0	1	Lois	Infant	off	1	NA	0
MAH00873	20131024	10:47	00:04:43	Lisa	Mother	NA	36	2	F	A-F	Full	5	2	1	00:07	00:08	00:08	1	1	2	2	left	body	1	R	R	F-Ins	0	1	Lois	Infant	off	0	NA	0
MAH00873	20131024	10:47	00:04:43	Lisa	Mother	NA	36	2	F	A-F	Full	5	3	1	00:27	00:31	00:19	1	4	5	1.25	left	body	1	F-Ins	R	R	0	1	Lois	Infant	off	0	NA	0
MAH00873	20131024	10:47	00:04:43	Lisa	Mother	NA	36	2	F	A-F	Full	5	4	1	0:41*	00:51	00:10	1	10	11	1.1	right	switch	1	R	R	R	0	1	Lois	Infant	off	0	NA	0
MAH00873	20131024	10:47	00:04:43	Lisa	Mother	NA	36	2	F	A-F	Full	5	5	1	00:57	01:06	00:06	1	9	8	0.888888889	right	body	1	R	R	M	1	1	Lois	Infant	off	0	NA	1
MAH00873	20131024	10:47	00:04:43	Lois	Infant	3	NA	NA	M	D-M	Full-Partial	1	1	0	02:47	02:50	NA	0	3	3	1	right	limbs	1	?	R	M	1	1	Lisa	Mother	mot	1	0	0
MAH00874	20131024	10:53	00:02:54	Lisa	Mother	NA	36	2	F	A-F	Full	5	1	1	0:00*	00:04	NA	0	4	5	1.25	left	limbs	1	R	R	R	0	1	Lois	Infant	off	0	NA	0
MAH00874	20131024	10:53	00:02:54	Lisa	Mother	NA	36	2	F	A-F	Full	5	2	1	00:04	00:05	00:00	0	1.5	2	1.333333333	left	NA	NA	R	R	Wait?	1	1	Lois	Infant	off	0	NA	0
MAH00874	20131024	10:53	00:02:54	Lisa	Mother	NA	36	2	F	A-F	Full	5	3	1	00:51	01:00	00:46	0	9	10	1.111111111	right	body	1	M	R	R	0	1	Lisa	Infant	off	0	NA	0
MAH00874	20131024	10:53	00:02:54	Lisa	Mother	NA	36	2	F	A-F	Full	5	4	1	01:01	01:04	00:01	0	3	5	1.666666667	right	body	1	R	R	R	0	1	Lisa	Infant	off	1	NA	0
MAH00874	20131024	10:53	00:02:54	Lisa	Mother	NA	36	2	F	A-F	Full	5	5	1	01:07	01:13	00:03	1	6	7	1.166666667	right	body	1	R	R	Wait?	1	1	Lisa	Infant	off	1	NA	0
MAH00876	20131024	11:59	00:00:56	Lisa	Mother	NA	36	2	F	A-F	Full	1	1	0	0:00*	00:02	NA	0	NA	10	NA	right	body	1	M	R	M	1	1	Lois	Infant	off	1	1	1
MAH00877	20131024	12:01	00:02:06	Lisa	Mother	NA	36	2	F	A-F	Full	4	1	1	0:00*	0:00*	NA	NA	NA	6	NA	right	body	1	M?	Bridge	Bridge	1	1	Lois	Infant	off	0	1	1
MAH00877	20131024	12:01	00:02:06	Lisa	Mother	NA	36	2	F	A-F	Full	4	2	1	0:00*	00:04	00:01	0	4	6	1.5	right	limbs	1	Bridge	Bridge	Bridge	1	1	Lois	Infant	off	0	1	1
MAH00877	20131024	12:01	00:02:06	Lisa	Mother	NA	36	2	F	A-F	Full	4	3	1	00:07	00:13	00:03	1	6	9	1.5	right	head	0	Bridge	Bridge	Bridge	1	1	Lois	Infant	off	1	1	1
MAH00877	20131024	12:01	00:02:06	Lisa	Mother	NA	36	2	F	A-F	Full	4	4	1	00:13	00:19	00:00	0	6	8	1.333333333	right	head	0	Bridge	Bridge	M	1	1	Lois	Infant	off	1	1	1
MAH00878	20131024	12:03	00:00:41	Lisa	Mother	NA	36	2	F	A-F	Full	1	1	0	0:00*	00:03	NA	0	NA	11	NA	left	NA	NA	M?	R	M	1	1	Lois	Infant	off	0	0	0
MAH00879	20131024	12:19	00:01:36	Lois	Infant	3	NA	NA	M	D-M	Full-Partial	1	1	0	0:00*	00:11	NA	0	11	18	1.636363636	left	body	1	R	R	R	0	1	Lisa	Mother	mot	1	0	0
MAH00881	20131024	12:43	00:01:21	Lisa	Mother	NA	36	2	F	A-F	Full	4	1	1	0:00*	00:03	NA	0	NA	14	NA	right	body	1	M?	Bridge?	M	1	1	Lois	Infant	off	1	1	1
MAH00881	20131024	12:43	00:01:21	Lisa	Mother	NA	36	2	F	A-F	Full	4	2	1	00:22	00:30	00:19	1	8	12	1.5	right	limbs	1	M	R	R	0	1	Lois	Infant	off	0	1	1
MAH00881	20131024	12:43	00:01:21	Lisa	Mother	NA	36	2	F	A-F	Full	4	3	1	00:34	00:48	00:04	1	14	15	1.071428571	left	limbs	1	R	R	R	0	1	Lois	Infant	off	0	1	1
MAH00881	20131024	12:43	00:01:21	Lisa	Mother	NA	36	2	F	A-F	Full	4	4	1	00:58	01:00	00:10	1	2	3	1.5	left	head	0	R	R	M	1	1	Lois	Infant	off	0	1	1
MAH00881	20131024	12:43	00:01:21	Lois	Infant	3	NA	NA	M	D-M	Full-Partial	1	1	0	00:53	00:59	NA	0	6	10	1.666666667	right	NA	NA	M	R	M	1	1	Lisa	Mother	mot	1	1	0
MAH00883	20131024	12:59	00:03:08	Lisa	Mother	NA	36	2	F	A-F	Full	1	1	0	1:06*	1:15*	NA	NA	9	11	1.222222222	right	body	1	M	R	M	1	1	Lois	Infant	off	0	NA	0
MAH00884	20131024	13:02	00:00:43	Lisa	Mother	NA	36	2	F	A-F	Full	1	1	0	0:00*	00:01	NA	0	NA	5	NA	right	limbs	1	M?	R	M	1	1	Lois	Infant	off	1	NA	1
MAH00888	20131024	13:16	00:00:56	Lisa	Mother	NA	36	2	F	A-F	Full	1	1	0	0:00*	00:06	NA	0	6	10	1.666666667	right	limbs	1	M	R	M	1	1	Lois	Infant	off	1	1	0
MAH00889	20131024	13:18	00:00:47	Lisa	Mother	NA	36	2	F	A-F	Full	1	1	0	00:19	00:20	NA	0	1.5	2	1.333333333	right	body	1	R?	R	M	1	1	Lois	Infant	off	1	1	0
MAH00891	20131024	13:24	00:03:34	Lisa	Mother	NA	36	2	F	A-F	Full	5	1	1	00:38	00:38	NA	0	1	1	1	left	head	0	F	F	M*	1	1	Lois	Infant	off	1	0	0
MAH00891	20131024	13:24	00:03:34	Lisa	Mother	NA	36	2	F	A-F	Full	5	2	1	00:48	00:58	00:10	1	10	15	1.5	left	body	1	M*	R	F	0	1	Lois	Infant	off	1	0	0
MAH00891	20131024	13:24	00:03:34	Lisa	Mother	NA	36	2	F	A-F	Full	5	3	1	02:02	02:02	01:04	0	1	1	1	left	head	0	F	F	F	0	1	Lois	Infant	off	0	0	0
MAH00891	20131024	13:24	00:03:34	Lisa	Mother	NA	36	2	F	A-F	Full	5	4	1	02:14	02:14	00:12	1	1	1	1	left	head	0	F	F	F	0	1	Lois	Infant	off	0	0	0
MAH00891	20131024	13:24	00:03:34	Lisa	Mother	NA	36	2	F	A-F	Full	5	5	1	02:26	02:27	00:12	1	1.5	2	1.333333333	left	body	1	F	F	F	0	1	Lois	Infant	off	0	0	0
MAH00891	20131024	13:24	00:03:34	Lois	Infant	3	NA	NA	M	D-M	Full-Partial	1	1	0	02:54	03:01	NA	0	7	10	1.428571429	right	limbs	1	R	R	R	0	1	Lisa	Mother	mot	0	0	0
MAH00895	20131024	13:31	00:01:44	Lois	Infant	3	NA	NA	M	D-M	Full-Partial	2	1	1	0:00*	00:06	NA	0	6	10	1.666666667	left	body	1	F	R	M*	1	1	Lisa	Mother	mot	1	1	0
MAH00895	20131024	13:31	00:01:44	Lois	Infant	3	NA	NA	M	D-M	Full-Partial	2	2	1	01:07	01:09	01:01	0	1.5	1	0.666666667	left	limbs	1	F?	F?	F?	0	1	Lisa	Mother	mot	1	0	0
MAH00896	20131024	13:34	00:02:01	Lois	Infant	3	NA	NA	M	D-M	Full-Partial	1	1	0	0:00*	00:10	NA	0	10	15	1.5	right	limbs	1	Suckle	Suckle	Suckle	0	1	Lisa	Mother	mot	1	1	0
MAH00897	20131024	13:39	00:01:36	Lois	Infant	3	NA	NA	M	D-M	Full-Partial	2	1	1	0:00*	00:10	NA	0	10	19	1.9	left	limbs	1	F	R	F	0	1	Lisa	Mother	mot	1	1	0
MAH00897	20131024	13:39	00:01:36	Lois	Infant	3	NA	NA	M	D-M	Full-Partial	2	2	1	01:08	01:13	00:58	0	5	8	1.6	left	limbs	1	F	F	F	0	1	Lisa	Mother	mot	1	1	0
MAH00898	20131024	13:45	00:01:28	Lois	Infant	3	NA	NA	M	D-M	Full-Partial	3	1	1	0:00*	0:00*	NA	NA	7	8	1.142857143	right	body	1	F	F	F	0	1	Lisa	Mother	mot	0	NA	0
MAH00898	20131024	13:45	00:01:28	Lois	Infant	3	NA	NA	M	D-M	Full-Partial	3	2	1	00:28	00:37	00:30	1	9	10	1.111111111	left	body	1	F	F	F	0	1	Lisa	Mother	mot	0	NA	0
MAH00898	20131024	13:45	00:01:28	Lois	Infant	3	NA	NA	M	D-M	Full-Partial	3	3	1	00:56	00:57	00:19	1	1	1	1	left	body	1	F	F	F	0	1	Lisa	Mother	mot	1	NA	0
MAH00899	20131024	13:54	00:06:41	Lois	Infant	3	NA	NA	M	D-M	Full-Partial	9	1	1	0:00*	00:21	NA	0	21	28	1.333333333	right	head	0	F	R	R?	0	1	Lisa	Mother	mot	1	1	0
MAH00899	20131024	13:54	00:06:41	Lois	Infant	3	NA	NA	M	D-M	Full-Partial	9	2	1	00:45	00:50	00:24	1	5	7	1.4	right	limbs	1	R?	R?	R?	0	1	Lisa	Mother	mot	1	1	0
MAH00899	20131024	13:54	00:06:41	Lois	Infant	3	NA	NA	M	D-M	Full-Partial	9	3	1	01:30	01:47	00:40	0	17	29	1.705882353	left	body	1	M*	R	F?	0	1	Lisa	Mother	mot	0	1	0
MAH00899	20131024	13:54	00:06:41	Lois	Infant	3	NA	NA	M	D-M	Full-Partial	9	4	1	02:03	02:09	00:16	1	6	7	1.166666667	left	limbs	1	F?	F?	F?	0	1	Lisa	Mother	mot	0	1	0
MAH00899	20131024	13:54	00:06:41	Lois	Infant	3	NA	NA	M	D-M	Full-Partial	9	5	1	02:24	02:29	00:15	1	5	6	1.2	left	switch	1	F?	R	R	0	1	Lisa	Mother	mot	1	1	0
MAH00899	20131024	13:54	00:06:41	Lois	Infant	3	NA	NA	M	D-M	Full-Partial	9	6	1	02:32	2:37*	00:03	NA	5	7	1.4	left	limbs	1	R	R	F	0	1	Lisa	Mother	mot	1	1	0
MAH00899	20131024	13:54	00:06:41	Lois	Infant	3	NA	NA	M	D-M	Full-Partial	9	7	1	03:11	03:23	00:34	0	12	24	2	right	body	1	F	F	F	0	1	Lisa	Mother	mot	0	1	0
MAH00899	20131024	13:54	00:06:41	Lois	Infant	3	NA	NA	M	D-M	Full-Partial	9	8	1	03:42	03:52	00:19	1	10	20	2	right	body	1	F	F	F	0	1	Lisa	Mother	mot	0	1	0
MAH00899	20131024	13:54	00:06:41	Lois	Infant	3	NA	NA	M	D-M	Full-Partial	9	9	1	04:07	04:24	00:15	1	17	27	1.588235294	right	body	1	F	F	M	1	1	Lisa	Mother	mot	0	1	0
MAH00899	20131024	13:54	00:06:41	Lisa	Mother	NA	36	2	F	A-F	Full	1	1	0	06:40	6:41*	NA	NA	1.5	2	1.333333333	right	body	1	F	F	?	NA	1	Lois	Infant	off	0	0	0
MAH00908	20131024	14:30	00:01:58	Lois	Infant	3	NA	NA	M	D-M	Full-Partial	1	1	0	00:30	00:34	NA	0	4	7	1.75	right	body	1	M	R	M	1	1	Lisa	Mother	mot	1	0	0
MAH00909	20131024	14:32	00:01:07	Lisa	Mother	NA	36	2	F	A-F	Full	6	1	1	0:00*	0:00*	NA	NA	NA	9	NA	left	limbs	1	M?	Bridge	Bridge	1	1	Lois	Infant	off	NA	NA	0
MAH00909	20131024	14:32	00:01:07	Lisa	Mother	NA	36	2	F	A-F	Full	6	2	1	0:00*	00:09	NA	0	9	11	1.222222222	left	body	1	Bridge	Bridge	Bridge	1	1	Lois	Infant	off	1	NA	0
MAH00909	20131024	14:32	00:01:07	Lisa	Mother	NA	36	2	F	A-F	Full	6	3	1	00:11	00:17	00:02	1	6	15	2.5	left	head	0	Bridge	Bridge	M*	1	1	Lois	Infant	off	0	NA	0
MAH00909	20131024	14:32	00:01:07	Lisa	Mother	NA	36	2	F	A-F	Full	6	4	1	00:22	00:34	00:05	1	12	16	1.333333333	right	switch	1	M*	Bridge	Bridge	1	1	Lois	Infant	off	1	NA	1
MAH00909	20131024	14:32	00:01:07	Lisa	Mother	NA	36	2	F	A-F	Full	6	5	1	00:36	00:48	00:02	1	12	13	1.083333333	right	body	1	Bridge	Bridge	Bridge	1	1	Lois	Infant	off	1	1	1
MAH00909	20131024	14:32	00:01:07	Lisa	Mother	NA	36	2	F	A-F	Full	6	6	1	00:55	00:56	00:07	1	1	2	2	left	head	0	Bridge	Bridge	M	1	1	Lois	Infant	off	0	1	1
MAH00912	20131024	14:55	00:00:29	Lois	Infant	3	NA	NA	M	D-M	Full-Partial	1	1	0	00:26	0:29*	NA	NA	3	7	2.333333333	right	body	1	M	R	?	NA	1	Lisa	Mother	mot	0	0	0
MAH00915	20131024	15:10	00:02:41	Lois	Infant	3	NA	NA	M	D-M	Full-Partial	1	1	0	0:00*	00:00	NA	0	NA	4	NA	left	head	0	TF	TF	M	1	1	Lisa	Mother	mot	1	1	0
MAH00915	20131024	15:10	00:02:41	Lisa	Mother	NA	36	2	F	A-F	Full	3	1	1	0:33*	00:44	NA	0	11	15	1.363636364	right	body	1	M?	R	R	0	1	Lois	Infant	off	1	1	0
MAH00915	20131024	15:10	00:02:41	Lisa	Mother	NA	36	2	F	A-F	Full	3	2	1	00:44	00:45	00:00	0	1.5	2	1.333333333	right	body	1	R	R	R	0	1	Lois	Infant	off	1	1	0
MAH00915	20131024	15:10	00:02:41	Lisa	Mother	NA	36	2	F	A-F	Full	3	3	1	00:51	01:04	00:06	1	13	15	1.153846154	right	body	1	R	R	M	1	1	Lois	Infant	off	1	1	0
MAH00919	20131024	16:06	00:01:17	Lois	Infant	3	NA	NA	M	D-M	Full-Partial	1	1	0	0:00*	00:02	NA	0	NA	6	NA	right	NA	NA	R?	R	M	1	1	Lisa	Mother	mot	1	1	0
MAH00920	20131024	16:09	00:01:09	Lois	Infant	3	NA	NA	M	D-M	Full-Partial	1	1	0	00:24	00:28	NA	0	4	7	1.75	right	body	1	F	R	M*	1	1	Lisa	Mother	mot	1	0	0
MAH00920	20131024	16:09	00:01:09	Lisa	Mother	NA	36	2	F	A-F	Full	1	1	0	00:32	00:32	NA	0	1	1	1	right	head	0	F	F	F	0	1	Lois	Infant	off	0	1	0
MAH00921	20131024	16:29	00:01:00	Lisa	Mother	NA	36	2	F	A-F	Full	1	1	0	0:00*	0:00*	NA	NA	2	3	1.5	right	NA	NA	F	F	F	0	1	Lois	Infant	off	NA	NA	0
MAH00924	20131024	16:41	00:02:26	Lisa	Mother	NA	36	2	F	A-F	Full	4	1	1	0:00*	00:02	NA	0	3.5	5	1.428571429	right	body	1	M	R	M*	1	1	Lois	Infant	off	1	NA	0
MAH00924	20131024	16:41	00:02:26	Lisa	Mother	NA	36	2	F	A-F	Full	4	2	1	00:15	00:21	00:13	1	6	7	1.166666667	right	limbs	1	M*	R	M*	1	1	Lois	Infant	off	1	NA	0
MAH00924	20131024	16:41	00:02:26	Lisa	Mother	NA	36	2	F	A-F	Full	4	3	1	00:38	00:54	00:17	1	16	19	1.1875	left	NA	NA	M*	R	R	0	1	Lois	Infant	off	0	NA	0
MAH00924	20131024	16:41	00:02:26	Lisa	Mother	NA	36	2	F	A-F	Full	4	4	1	00:59	01:14	00:05	1	15	18	1.2	NA	NA	NA	R	R	Bridge	1	1	Lois	Infant	off	NA	NA	0
MAH00925	20131024	16:49	00:05:31	Lois	Infant	3	NA	NA	M	D-M	Full-Partial	5	1	1	00:30	00:37	NA	0	7	10	1.428571429	right	head	0	R	R	R	0	1	Lisa	Mother	mot	0	0	0
MAH00925	20131024	16:49	00:05:31	Lois	Infant	3	NA	NA	M	D-M	Full-Partial	5	2	1	01:15	01:33	00:38	0	18	24	1.333333333	right	limbs	1	R	R	R	0	1	Lisa	Mother	mot	1	0	0
MAH00925	20131024	16:49	00:05:31	Lois	Infant	3	NA	NA	M	D-M	Full-Partial	5	3	1	02:21	02:36	00:48	0	15	19	1.266666667	right	body	1	R	R	R	0	1	Lisa	Mother	mot	1	0	0
MAH00925	20131024	16:49	00:05:31	Lois	Infant	3	NA	NA	M	D-M	Full-Partial	5	4	1	03:20	03:37	00:44	0	17	22	1.294117647	right	head	0	R	R	R	0	1	Lisa	Mother	mot	1	0	0
MAH00925	20131024	16:49	00:05:31	Lois	Infant	3	NA	NA	M	D-M	Full-Partial	5	5	1	03:41	03:43	00:04	1	2	3	1.5	right	body	1	R	R	R	0	1	Lisa	Mother	mot	1	0	0
MAH00934	20131026	10:14	00:01:49	Lisa	Mother	NA	36	2	F	A-F	Partial	1	1	0	01:09	01:15	NA	0	6	8	1.333333333	right	body	1	SP	R	SP	0	1	Lois	Infant	off	1	1	0
MAH00944	20131026	16:41	00:00:36	Lois	Infant	3	NA	NA	M	D-M	Partial	2	1	1	00:16	00:18	NA	0	2	3	1.5	left	body	1	M	R	R	0	1	Lisa	Mother	mot	1	0	0
MAH00944	20131026	16:41	00:00:36	Lois	Infant	3	NA	NA	M	D-M	Partial	2	2	1	00:20	00:23	00:02	1	3	5	1.666666667	right	body	1	R	R	?	NA	1	Lisa	Mother	mot	1	0	0
S1110003	20131109	09:36	00:05:31	Lilly	Adolescent	NA	NA	NA	F	D-F	Partial	2	1	1	01:42	01:49	NA	0	7	8	1.142857143	left	limbs	1	M*	R	M*	1	1	Ulysses	None	oth	0	0	0
S1110003	20131109	09:36	00:05:31	Lilly	Adolescent	NA	NA	NA	F	D-F	Partial	2	2	1	03:46	03:49	01:57	0	3	4	1.333333333	left	limbs	1	F	F	F	0	1	Ulysses	None	oth	0	0	0
S1110006	20131109	11:32	00:00:41	Lilly	Adolescent	NA	NA	NA	F	D-F	Partial	1	1	0	00:00	00:06	NA	0	6	7	1.166666667	right	switch	1	F	Peer	Peer	0	1	Ulysses	None	oth	1	1	0
S1110007	20131109	11:33	00:03:45	Lilly	Adolescent	NA	NA	NA	F	D-F	Partial	1	1	0	00:10	00:11	NA	0	1.5	2	1.333333333	left	limbs	1	Peer	Peer	Gr?	0	1	Ulysses	None	oth	1	1	0
S1110008	20131109	11:37	00:00:14	Ulysses	Unflanged	NA	NA	NA	M	A-M	Partial	1	1	0	0:00*	00:07	NA	0	7	10	1.428571429	left	body	1	F	F	F	0	1	Lilly	None	oth	1	1	0
00038A	20131201	13:27	00:01:41	Lilly	Adolescent	NA	NA	NA	F	D-F	Partial	1	1	0	00:04	00:06	NA	0	2	4	2	right	head	0	F-Ins	R	F-Ins	0	1	Pluto	None	oth	0	NA	0
00041A	20131201	14:13	00:04:13	Lilly	Adolescent	NA	NA	NA	F	D-F	Partial	2	1	1	02:04	02:06	NA	0	2	4	2	left	limbs	1	Exp	R	R	0	1	Pluto	None	oth	0	NA	0
00041A	20131201	14:13	00:04:13	Lilly	Adolescent	NA	NA	NA	F	D-F	Partial	2	2	1	02:13	02:15	00:07	1	2	3	1.5	right	limbs	1	R	R	Exp	0	1	Pluto	None	oth	0	NA	0
00059A	20131203	12:43	00:04:32	Lilly	Adolescent	NA	NA	NA	F	D-F	Partial	1	1	0	02:10	02:12	NA	0	2	3	1.5	left	head	0	F	F	F	0	0	NA	NA	NA	NA	NA	NA
00064A	20131203	14:14	00:00:26	Lilly	Adolescent	NA	NA	NA	F	D-F	Partial	1	1	0	00:09	00:14	NA	0	5	6	1.2	right	body	1	Display	R	M	1	1	Pluto	None	oth	0	NA	0
S1270002	20131204	06:24	00:01:20	Lilly	Adolescent	NA	NA	NA	F	D-F	Full	2	1	1	0:00*	0:00*	NA	NA	NA	2	NA	right	limbs	1	F	F	F	0	0	NA	NA	NA	NA	NA	NA
S1270002	20131204	06:24	00:01:20	Lilly	Adolescent	NA	NA	NA	F	D-F	Full	2	2	1	00:00	00:01	00:01	0	1	2	2	right	head	0	F	F	F	0	0	NA	NA	NA	NA	NA	NA
S1270012	20131204	08:47	00:02:28	Lilly	Adolescent	NA	NA	NA	F	D-F	Full	2	1	1	00:36	00:40	NA	0	4	2	0.5	left	head	0	M	R	M	1	0	NA	NA	NA	NA	NA	NA
S1270012	20131204	08:47	00:02:28	Lilly	Adolescent	NA	NA	NA	F	D-F	Full	2	2	1	00:59	01:00	00:19	1	1	2	2	left	body	1	M	M	M	1	0	NA	NA	NA	NA	NA	NA
S1270021	20131204	09:58	00:01:13	Lilly	Adolescent	NA	NA	NA	F	D-F	Full	1	1	0	0:00*	00:05	NA	0	5	5	1	object	limbs	1	Rs	Rs	Rs	0	0	NA	NA	NA	NA	NA	NA
S1270029	20131204	11:14	00:01:12	Lilly	Adolescent	NA	NA	NA	F	D-F	Full	1	1	0	0:00*	00:06	NA	0	6	8	1.333333333	right	body	1	M*	R	M	1	0	NA	NA	NA	NA	NA	NA
S1270031	20131204	11:37	00:01:47	Lilly	Adolescent	NA	NA	NA	F	D-F	Full	1	1	0	01:25	01:25	NA	0	1	1	1	left	head	0	F	F	F	0	0	NA	NA	NA	NA	NA	NA
S1270032	20131204	11:41	00:00:21	Lilly	Adolescent	NA	NA	NA	F	D-F	Full	1	1	0	0:00*	00:03	NA	0	3	4	1.333333333	left	head	0	M	R	M	1	0	NA	NA	NA	NA	NA	NA
S1270040	20131204	13:23	00:01:14	Lilly	Adolescent	NA	NA	NA	F	D-F	Full	1	1	0	00:52	00:52	NA	0	1	1	1	right	body	1	F	M*	F	0	0	NA	NA	NA	NA	NA	NA
S1270041	20131204	13:25	00:03:09	Lilly	Adolescent	NA	NA	NA	F	D-F	Full	1	1	0	00:27	00:36	NA	0	9	10	1.111111111	left	switch	1	F	R	F	0	0	NA	NA	NA	NA	NA	NA
S1270047	20131204	13:59	00:04:03	Lilly	Adolescent	NA	NA	NA	F	D-F	Full	7	1	1	0:00*	00:08	NA	0	8	11	1.375	right	body	1	F	F	F	0	0	NA	NA	NA	NA	NA	NA
S1270047	20131204	13:59	00:04:03	Lilly	Adolescent	NA	NA	NA	F	D-F	Full	7	2	1	00:15	00:24	00:07	1	9	11	1.222222222	right	body	1	F	F	F	0	0	NA	NA	NA	NA	NA	NA
S1270047	20131204	13:59	00:04:03	Lilly	Adolescent	NA	NA	NA	F	D-F	Full	7	3	1	00:24	00:24	00:00	0	1	1	1	right	head	0	F	F	F	0	0	NA	NA	NA	NA	NA	NA
S1270047	20131204	13:59	00:04:03	Lilly	Adolescent	NA	NA	NA	F	D-F	Full	7	4	1	00:25	00:25	00:01	0	1	1	1	right	head	0	F	F	F	0	0	NA	NA	NA	NA	NA	NA
S1270047	20131204	13:59	00:04:03	Lilly	Adolescent	NA	NA	NA	F	D-F	Full	7	5	1	01:12	01:25	00:47	0	13	23	1.769230769	right	head	0	F	F	M*	1	0	NA	NA	NA	NA	NA	NA
S1270047	20131204	13:59	00:04:03	Lilly	Adolescent	NA	NA	NA	F	D-F	Full	7	6	1	01:31	01:33	00:06	1	1.5	2	1.333333333	right	body	1	M*	F	F	0	0	NA	NA	NA	NA	NA	NA
S1270047	20131204	13:59	00:04:03	Lilly	Adolescent	NA	NA	NA	F	D-F	Full	7	7	1	01:33	01:37	00:00	0	4	7	1.75	right	head	0	F	F	F	0	0	NA	NA	NA	NA	NA	NA
S1270048	20131204	14:03	00:01:05	Lilly	Adolescent	NA	NA	NA	F	D-F	Full	1	1	0	0:00*	0:00*	NA	NA	NA	3	NA	right	switch	1	F	F	M*	1	0	NA	NA	NA	NA	NA	NA
S1270051	20131204	14:14	00:02:02	Lilly	Adolescent	NA	NA	NA	F	D-F	Full	2	1	1	00:29	00:30	NA	0	1	2	2	left	head	0	F	M*	F	0	0	NA	NA	NA	NA	NA	NA
S1270051	20131204	14:14	00:02:02	Lilly	Adolescent	NA	NA	NA	F	D-F	Full	2	2	1	01:34	01:34	01:04	0	1	1	1	right	head	0	F	F	F	0	0	NA	NA	NA	NA	NA	NA
S1270052	20131204	14:17	00:01:16	Lilly	Adolescent	NA	NA	NA	F	D-F	Full	1	1	0	0:00*	00:01	NA	0	NA	4	NA	right	head	0	F	F	F	0	0	NA	NA	NA	NA	NA	NA
S1270053	20131204	14:21	00:00:28	Lilly	Adolescent	NA	NA	NA	F	D-F	Full	1	1	0	0:00*	00:02	NA	0	NA	10	NA	right	body	1	?	R	M	1	0	NA	NA	NA	NA	NA	NA
S1270054	20131204	14:36	00:00:38	Lilly	Adolescent	NA	NA	NA	F	D-F	Full	1	1	0	0:00*	00:05	NA	0	5	6	1.2	left	head	0	F	M*	F	0	0	NA	NA	NA	NA	NA	NA
S1270055	20131204	14:46	00:00:16	Lilly	Adolescent	NA	NA	NA	F	D-F	Full	1	1	0	0:00*	0:00*	NA	NA	NA	7	NA	right	body	1	F	F	F	0	0	NA	NA	NA	NA	NA	NA
MAH01241	20131204	14:56	00:00:38	Lilly	Adolescent	NA	NA	NA	F	D-F	Full	1	1	0	0:00*	00:01	NA	0	NA	3	NA	left	body	1	F	F	F	0	0	NA	NA	NA	NA	NA	NA
MAH01242	20131204	14:57	00:00:58	Lilly	Adolescent	NA	NA	NA	F	D-F	Full	1	1	0	0:00*	00:03	NA	0	3	5	1.666666667	right	body	1	F	F	F	0	0	NA	NA	NA	NA	NA	NA
MAH01243	20131204	15:01	00:00:34	Lilly	Adolescent	NA	NA	NA	F	D-F	Full	1	1	0	0:00*	0:00*	NA	NA	1	1	1	left	limbs	1	F	F	F	0	0	NA	NA	NA	NA	NA	NA
MAH01244	20131204	15:03	00:00:31	Lilly	Adolescent	NA	NA	NA	F	D-F	Full	2	1	1	0:00*	0:00*	NA	NA	1	1	1	right	body	1	F	F	F	0	0	NA	NA	NA	NA	NA	NA
MAH01244	20131204	15:03	00:00:31	Lilly	Adolescent	NA	NA	NA	F	D-F	Full	2	2	1	00:02	00:03	00:03	1	1	2	2	right	limbs	1	F	F	F	0	0	NA	NA	NA	NA	NA	NA
MAH01245	20131204	15:03	00:00:17	Lilly	Adolescent	NA	NA	NA	F	D-F	Full	1	1	0	0:00*	0:00*	NA	NA	NA	3	NA	right	body	1	F	F	F	0	0	NA	NA	NA	NA	NA	NA
MAH01248	20131204	15:19	00:00:27	Lilly	Adolescent	NA	NA	NA	F	D-F	Full	1	1	0	0:00*	0:00*	NA	NA	NA	3	NA	left	limbs	1	F	R	M	1	0	NA	NA	NA	NA	NA	NA
MAH01250	20131204	15:32	00:00:32	Lilly	Adolescent	NA	NA	NA	F	D-F	Full	1	1	0	0:00*	0:00*	NA	NA	NA	2	NA	right	limbs	1	F-Ins	F-Ins	F-Ins	0	0	NA	NA	NA	NA	NA	NA
MAH01251	20131204	15:42	00:00:32	Lilly	Adolescent	NA	NA	NA	F	D-F	Full	1	1	0	0:00*	00:02	NA	0	2	3	1.5	right	body	1	F	F	M	1	0	NA	NA	NA	NA	NA	NA
MAH01252	20131204	15:47	00:00:24	Lilly	Adolescent	NA	NA	NA	F	D-F	Full	1	1	0	0:00*	0:00*	NA	NA	NA	4	NA	NA	NA	NA	F-Ins	R	M	1	0	NA	NA	NA	NA	NA	NA
MAH01253	20131204	16:03	00:00:58	Lilly	Adolescent	NA	NA	NA	F	D-F	Full	1	1	0	00:36	00:37	NA	0	1	2	2	left	head	0	F-Ins	F-Ins	F-Ins	0	0	NA	NA	NA	NA	NA	NA
MAH01254	20131204	16:21	00:00:18	Lilly	Adolescent	NA	NA	NA	F	D-F	Full	1	1	0	0:00*	00:08	NA	0	8	9	1.125	right	body	1	?	R	M	1	0	NA	NA	NA	NA	NA	NA
MAH01256	20131204	17:06	00:00:48	Lilly	Adolescent	NA	NA	NA	F	D-F	Full	1	1	0	0:00*	0:00*	NA	NA	1	1	1	left	body	1	F	F	F	0	0	NA	NA	NA	NA	NA	NA
MAH00981	20131029	11:41	00:01:08	Chindy	Adolescent	10	NA	NA	F	D-F	Partial	2	1	1	0:00*	00:01	NA	0	NA	4	NA	right	head	0	Display	Display	Display	0	1	Cissy+Cinnamon	Mother+Sibling	mot	NA	NA	0
MAH00981	20131029	11:41	00:01:08	Chindy	Adolescent	10	NA	NA	F	D-F	Partial	2	2	1	00:15	00:21	00:14	1	6	7	1.166666667	right	head	0	Display	R	R	0	1	Cissy+Cinnamon	Mother+Sibling	mot	NA	NA	0
MAH00987	20131029	12:01	00:02:53	Chindy	Adolescent	10	NA	NA	F	D-F	Partial	4	1	1	00:30	00:37	NA	0	7	9	1.285714286	right	head	0	F	F	F	0	1	Cissy+Cinnamon	Mother+Sibling	mot	0	0	0
MAH00987	20131029	12:01	00:02:53	Chindy	Adolescent	10	NA	NA	F	D-F	Partial	4	2	1	00:39	00:39	00:02	1	1	1	1	left	head	0	F	F	F	0	1	Cissy+Cinnamon	Mother+Sibling	mot	0	0	0
MAH00987	20131029	12:01	00:02:53	Chindy	Adolescent	10	NA	NA	F	D-F	Partial	4	3	1	02:14	02:14	01:35	0	1	2	2	right	head	0	F	F	F	0	1	Cissy+Cinnamon	Mother+Sibling	mot	0	0	0
MAH00987	20131029	12:01	00:02:53	Chindy	Adolescent	10	NA	NA	F	D-F	Partial	4	4	1	02:15	02:18	00:01	0	3	4	1.333333333	right	head	0	F	F	F	0	1	Cissy+Cinnamon	Mother+Sibling	mot	0	0	0
MAH00989	20131029	12:07	00:01:43	Chindy	Adolescent	10	NA	NA	F	D-F	Partial	1	1	0	00:32	00:33	NA	0	1.5	3	2	right	head	0	F	F	F	0	1	Cissy+Cinnamon	Mother+Sibling	mot	0	0	0
MAH00991	20131029	12:12	00:00:44	Chindy	Adolescent	10	NA	NA	F	D-F	Partial	1	1	0	0:00*	0:00*	NA	NA	NA	NA	NA	left	head	0	F	F	F	0	1	Cissy+Cinnamon	Mother+Sibling	mot	0	0	0
MAH00993	20131029	12:15	00:01:41	Chindy	Adolescent	10	NA	NA	F	D-F	Partial	3	1	1	00:42	00:46	NA	0	4	6	1.5	right	body	1	F	F	F	0	1	Cissy+Cinnamon	Mother+Sibling	mot	0	0	0
MAH00993	20131029	12:15	00:01:41	Chindy	Adolescent	10	NA	NA	F	D-F	Partial	3	2	1	00:47	00:47	00:01	0	NA	NA	NA	right	body	1	F	F	F	0	1	Cissy+Cinnamon	Mother+Sibling	mot	0	0	0
MAH00993	20131029	12:15	00:01:41	Chindy	Adolescent	10	NA	NA	F	D-F	Partial	3	3	1	01:19	01:26	00:32	0	7	8	1.142857143	right	limbs	1	F	F	F	0	1	Cissy+Cinnamon	Mother+Sibling	mot	0	0	0
MAH00995	20131029	12:18	00:00:33	Chindy	Adolescent	10	NA	NA	F	D-F	Partial	1	1	0	0:00*	00:00	NA	0	NA	3	NA	left	head	0	F	F	F	0	1	Cissy+Cinnamon	Mother+Sibling	mot	0	0	0
MAH00996	20131029	12:22	00:03:03	Chindy	Adolescent	10	NA	NA	F	D-F	Partial	1	1	0	00:48	00:52	NA	0	4	5	1.25	right	head	0	F	F	F	0	1	Cissy+Cinnamon	Mother+Sibling	mot	0	0	0
MAH01004	20131029	12:59	00:01:46	Cissy	Mother	45	19	4	F	A-F	Partial	4	1	1	0:00*	00:05	NA	0	5	7	1.4	left	body	1	R	R	M	1	1	Cinnamon	Infant	off	1	1	1
MAH01004	20131029	12:59	00:01:46	Cissy	Mother	45	19	4	F	A-F	Partial	4	2	1	00:34	00:42	00:29	1	8	11	1.375	right	body	1	R	R	R	0	1	Cinnamon	Infant	off	1	1	1
MAH01004	20131029	12:59	00:01:46	Cissy	Mother	45	19	4	F	A-F	Partial	4	3	1	00:42	00:45	00:00	0	3	4	1.333333333	right	body	1	R	R	R	0	1	Cinnamon	Infant	off	0	1	1
MAH01004	20131029	12:59	00:01:46	Cissy	Mother	45	19	4	F	A-F	Partial	4	4	1	00:45	00:50	00:00	0	5	6	1.2	right	body	1	R	R	M	1	1	Cinnamon	Infant	off	0	1	1
MAH01009	20131030	06:34	00:01:30	Chindy	Adolescent	10	NA	NA	F	D-F	Partial	4	1	1	0:00*	00:04	NA	0	4	4	1	right	limbs	1	?	R	R	0	1	Cissy+Cinnamon	Mother+Sibling	mot	1	0	0
MAH01009	20131030	06:34	00:01:30	Chindy	Adolescent	10	NA	NA	F	D-F	Partial	4	2	1	00:04	00:08	00:00	0	4	5	1.25	right	body	1	R	R	R	0	1	Cissy+Cinnamon	Mother+Sibling	mot	1	0	0
MAH01009	20131030	06:34	00:01:30	Chindy	Adolescent	10	NA	NA	F	D-F	Partial	4	3	1	00:08	00:09	00:00	0	1.5	2	1.333333333	right	switch	1	R	R	R	0	1	Cissy+Cinnamon	Mother+Sibling	mot	1	0	0
MAH01009	20131030	06:34	00:01:30	Chindy	Adolescent	10	NA	NA	F	D-F	Partial	4	4	1	00:09	00:12	00:00	0	3	4	1.333333333	right	body	1	R	R	M	1	1	Cissy+Cinnamon	Mother+Sibling	mot	1	0	0
MAH01010	20131030	06:45	00:09:39	Chindy	Adolescent	10	NA	NA	F	D-F	Partial	1	1	0	0:27*	00:39	NA	0	12	17	1.416666667	left	body	1	M	R	M	1	1	Cissy+Cinnamon	Mother+Sibling	mot	0	0	0
MAH01011	20131030	06:47	00:01:21	Cissy	Mother	45	19	4	F	A-F	Full	4	1	1	0:00*	00:13	NA	0	13	17	1.307692308	both	limbs	1	F	R	F	0	1	Cinnamon	Infant	off	1	1	0
MAH01011	20131030	06:47	00:01:21	Cissy	Mother	45	19	4	F	A-F	Full	4	2	1	00:31	00:44	00:18	1	13	16	1.230769231	left	limbs	1	F	R	F	0	1	Cinnamon	Infant	off	1	1	0
MAH01011	20131030	06:47	00:01:21	Cissy	Mother	45	19	4	F	A-F	Full	4	3	1	01:39	01:45	00:55	0	6	10	1.666666667	left	body	1	F	R	R	0	1	Cinnamon	Infant	off	1	1	0
MAH01011	20131030	06:47	00:01:21	Cissy	Mother	45	19	4	F	A-F	Full	4	4	1	01:45	01:58	00:00	0	13	18	1.384615385	left	body	1	R	R	F	0	1	Cinnamon	Infant	off	1	1	0
MAH01017	20131030	07:20	00:00:25	Cissy	Mother	45	19	4	F	A-F	Full	1	1	0	0:00*	00:04	NA	0	4	4	1	left	head	1	R	R	M	1	1	Cinnamon	Infant	off	0	1	1
MAH01020	20131030	07:38	00:00:22	Cinnamon	Infant	1	NA	NA	F	D-F	Partial	1	1	0	0:00*	00:16	NA	0	16	20	1.25	right	body	1	Rc	Rc	Rc	0	0	Cissy	Mother	mot	NA	NA	NA
MAH01024	20131030	07:53	00:01:01	Cissy	Mother	45	19	4	F	A-F	Full	1	1	0	0:00*	0:00*	NA	NA	1	1	1	right	body	1	?	M	M	1	0	Cinnamon	Infant	off	NA	NA	NA
MAH01029	20131030	08:24	00:01:01	Cissy	Mother	45	19	4	F	A-F	Full	2	1	1	00:15	00:25	NA	0	10	13	1.3	right	body	1	M	Bridge	Bridge	1	1	Cinnamon	Infant	off	0	1	0
MAH01029	20131030	08:24	00:01:01	Cissy	Mother	45	19	4	F	A-F	Full	2	2	1	00:26	00:30	00:01	0	4	5	1.25	right	body	1	Bridge	Bridge	Bridge	1	1	Cinnamon	Infant	off	0	1	0
MAH01030	20131030	08:27	00:01:06	Cissy	Mother	45	19	4	F	A-F	Full	1	1	0	0:00*	0:00*	NA	NA	NA	6	NA	right	body	1	M	Wait	Wait	1	1	Cinnamon	Infant	off	0	1	1
MAH01031	20131030	08:29	00:01:06	Cissy	Mother	45	19	4	F	A-F	Full	1	1	0	00:31	00:44	NA	0	13	15	1.153846154	left	body	1	Bridge	Bridge	Retrieve	1	1	Cinnamon	Infant	off	1	1	0
MAH01040	20131030	09:47	00:00:29	Cinnamon	Infant	1	NA	NA	F	D-F	Partial	1	1	0	0:00*	00:06	NA	0	6	7	1.166666667	left	switch	1	R?	R	M	1	1	Cissy	Mother	mot	1	0	0
MAH01042	20131030	09:49	00:00:30	Cissy	Mother	45	19	4	F	A-F	Full	1	1	0	0:00*	0:00*	NA	NA	NA	3	NA	right	NA	NA	M	R	Retrieve	1	1	Cinnamon	Infant	off	0	1	NA
MAH01048	20131030	10:33	00:06:05	Cissy	Mother	45	19	4	F	A-F	Full	2	1	1	0:00*	00:05	NA	0	5	7	1.4	left	switch	1	F	F	F	0	1	Cinnamon	Infant	off	0	0	0
MAH01048	20131030	10:33	00:06:05	Cissy	Mother	45	19	4	F	A-F	Full	2	2	1	01:07	01:11	01:02	0	4	5	1.25	right	switch	1	F	F	F	0	1	Cinnamon	Infant	off	0	0	0
MAH01048	20131030	10:33	00:06:05	Cinnamon	Infant	1	NA	NA	F	D-F	Partial	1	1	0	05:55	06:05	NA	0	10	17	1.7	right	NA	NA	APO	R	?	NA	1	Cissy	Mother	mot	0	0	0
MAH01049	20131030	10:42	00:00:21	Cissy	Mother	45	19	4	F	A-F	Full	3	1	1	0:00*	00:02	NA	0	NA	6	NA	right	switch	1	M	R	R	0	1	Cinnamon	Infant	off	1	1	1
MAH01049	20131030	10:42	00:00:21	Cissy	Mother	45	19	4	F	A-F	Full	3	2	1	00:02	00:06	00:00	0	4	6	1.5	right	NA	NA	R	R	R	0	1	Cinnamon	Infant	off	1	1	1
MAH01049	20131030	10:42	00:00:21	Cissy	Mother	45	19	4	F	A-F	Full	3	3	1	00:06	00:09	00:00	0	3	4	1.333333333	right	switch	1	R	R	M	1	1	Cinnamon	Infant	off	1	1	1
MAH01054	20131030	11:06	00:02:41	Cissy	Mother	45	19	4	F	A-F	Full	NA	1	NA	0:00*	00:01	NA	0	NA	3	NA		NA	NA	NA	NA	NA	NA	NA	NA	NA	NA	NA	NA	NA
MAH00556	20131009	12:07	00:00:21	Sarabi	Mother	NA	7	3	F	A-F	Partial	1	1	0	00:09	00:13	NA	0	4	5	1.25	right	body	1	F	R	M	1	0	Simba	Infant	off	NA	NA	NA
MAH00557	20131009	12:08	00:00:16	Sarabi	Mother	NA	7	3	F	A-F	Partial	1	1	0	00:02	00:08	NA	0	5	7	1.4	left	switch	1	?	M	M	1	0	Simba	Infant	off	NA	NA	NA
MAH00561	20131009	15:12	00:01:53	Sarabi	Mother	NA	7	3	F	A-F	Partial	1	1	0	01:09	01:11	NA	0	2	2	1	right	body	1	F	F	F	0	0	Simba	Infant	off	NA	NA	NA
MAH00566	20131011	10:26	00:05:58	Sarabi	Mother	NA	7	3	F	A-F	Partial	5	1	1	03:36	03:39	NA	0	3	4	1.333333333	left	limbs	1	R	R	M	1	0	Simba	Infant	off	NA	NA	NA
MAH00566	20131011	10:26	00:05:58	Sarabi	Mother	NA	7	3	F	A-F	Partial	5	2	1	03:47	03:57	00:08	1	10	11	1.1	right	limbs	1	M	R	R	0	0	Simba	Infant	off	NA	NA	NA
MAH00566	20131011	10:26	00:05:58	Sarabi	Mother	NA	7	3	F	A-F	Partial	5	3	1	04:25	04:29	00:28	1	4	5	1.25	right	body	1	R	R	R	0	0	Simba	Infant	off	NA	NA	NA
MAH00566	20131011	10:26	00:05:58	Sarabi	Mother	NA	7	3	F	A-F	Partial	5	4	1	04:34	04:41	00:05	1	7	9	1.285714286	right	body	1	R	R	R	0	0	Simba	Infant	off	NA	NA	NA
MAH00566	20131011	10:26	00:05:58	Sarabi	Mother	NA	7	3	F	A-F	Partial	5	5	1	04:48	04:50	00:07	1	2	3	1.5	right	switch	1	R	R	M	1	0	Simba	Infant	off	NA	NA	NA
MAH00551	20131008	13:57	00:00:14	Sarabi	Mother	NA	7	3	F	A-F	Partial	1	1	0	00:00	00:04	NA	0	4	5	1.25	left	switch	1	?	M	M	1	0	Simba	Infant	off	NA	NA	NA
MAH00567	20131012	06:35	00:01:47	Sarabi	Mother	NA	7	3	F	A-F	Full-Partial	4	1	1	00:00	00:13	NA	0	13	13	1	right	body	1	R	R	M	1	0	Simba	Infant	off	NA	NA	NA
MAH00567	20131012	06:35	00:01:47	Sarabi	Mother	NA	7	3	F	A-F	Full-Partial	4	2	1	00:49	00:56	00:36	0	7	9	1.285714286	left	head	0	M	R	M	1	0	Simba	Infant	off	NA	NA	NA
MAH00567	20131012	06:35	00:01:47	Sarabi	Mother	NA	7	3	F	A-F	Full-Partial	4	3	1	01:15	01:20	00:19	1	5	3	0.6	left	limbs	1	M	M	M	1	0	Simba	Infant	off	NA	NA	NA
MAH00567	20131012	06:35	00:01:47	Sarabi	Mother	NA	7	3	F	A-F	Full-Partial	4	4	1	01:24	01:33	00:04	1	9	11	1.222222222	right	body	1	M	M	M	1	0	Simba	Infant	off	NA	NA	NA
MAH00570	20131012	06:42	00:01:04	Sarabi	Mother	NA	7	3	F	A-F	Full-Partial	3	1	1	00:00	00:09	NA	0	9	9	1	right	NA	NA	?	R	M	1	0	Simba	Infant	off	NA	NA	NA
MAH00570	20131012	06:42	00:01:04	Sarabi	Mother	NA	7	3	F	A-F	Full-Partial	3	2	1	00:12	00:20	00:03	1	8	8	1	right	body	1	M	R	M	1	0	Simba	Infant	off	NA	NA	NA
MAH00570	20131012	06:42	00:01:04	Sarabi	Mother	NA	7	3	F	A-F	Full-Partial	3	3	1	00:38	00:42	00:18	1	4	6	1.5	right	body	1	M	R	R	0	0	Simba	Infant	off	NA	NA	NA
MAH00571	20131012	06:43	00:00:46	Sarabi	Mother	NA	7	3	F	A-F	Full-Partial	1	1	0	00:00	00:10	NA	0	10	11	1.1	right	body	1	M	R	M	1	0	Simba	Infant	off	NA	NA	NA
MAH00572	20131012	06:46	00:00:38	Sarabi	Mother	NA	7	3	F	A-F	Full-Partial	1	1	0	00:19	00:23	NA	0	4	5	1.25	left	body	1	R	R	M	1	0	Simba	Infant	off	NA	NA	NA
MAH00576	20131012	07:13	00:01:44	Sarabi	Mother	NA	7	3	F	A-F	Full-Partial	1	1	0	00:00	00:06	NA	0	6	8	1.333333333	left	body	1	F	F	F	0	0	Simba	Infant	off	NA	NA	NA
MAH00577	20131012	07:18	00:00:36	Sarabi	Mother	NA	7	3	F	A-F	Full-Partial	1	1	0	00:00	00:03	NA	0	3	4	1.333333333	right	limbs	1	F	R	M	1	0	Simba	Infant	off	NA	NA	NA
MAH00580	20131012	07:37	00:01:52	Sarabi	Mother	NA	7	3	F	A-F	Full-Partial	2	1	1	00:00	00:02	NA	0	2	3	1.5	left	head	0	F	F	F	0	0	Simba	Infant	off	NA	NA	NA
MAH00580	20131012	07:37	00:01:52	Sarabi	Mother	NA	7	3	F	A-F	Full-Partial	2	2	1	00:41	00:46	00:39	0	5	5	1	left	body	1	F	F	M	1	0	Simba	Infant	off	NA	NA	NA
MAH00589	20131012	08:51	00:00:45	Sazu	Juvenile	NA	NA	NA	M	D-M	Full-Partial	2	1	1	00:17	00:21	NA	0	4	7	1.75	left	body	1	F	F	F	0	1	Sarabi+Simba	Mother	mot	NA	NA	NA
MAH00589	20131012	08:51	00:00:45	Sazu	Juvenile	NA	NA	NA	M	D-M	Full-Partial	2	2	1	00:29	00:32	00:08	1	3	5	1.666666667	left	body	1	F	F	F	0	1	Sarabi+Simba	Mother	mot	NA	NA	NA
MAH00598	20131012	10:12	00:03:51	Sazu	Juvenile	NA	NA	NA	M	D-M	Full-Partial	1	1	0	03:02	03:06	NA	0	4	5	1.25	right	head	0	R	R	R	0	1	Sarabi+Simba	Mother	mot	NA	NA	NA
MAH00610	20131012	10:53	00:01:31	Simba	Infant	0	NA	NA	M	D-M	Full-Partial	1	1	0	00:45	00:49	NA	0	4	5	1.25	left	limbs	1	F	F	F	0	0	Sarabi	Mother	mot	NA	NA	NA
MAH00611	20131012	11:00	00:01:01	Sarabi	Mother	NA	7	3	F	A-F	Full-Partial	2	1	1	00:00	00:07	NA	0	7	7	1	left	limbs	1	F	F	F	0	0	Simba	Infant	off	NA	NA	NA
MAH00611	20131012	11:00	00:01:01	Sarabi	Mother	NA	7	3	F	A-F	Full-Partial	2	2	1	00:13	00:19	00:04	1	6	6	1	right	body	1	F	F	F	0	0	Simba	Infant	off	NA	NA	NA
MAH00613	20131012	11:03	00:01:35	Sarabi	Mother	NA	7	3	F	A-F	Full-Partial	4	1	1	00:00	00:08	NA	0	8	9	1.125	left	limbs	1	R	R	R	0	0	Simba	Infant	off	NA	NA	NA
MAH00613	20131012	11:03	00:01:35	Sarabi	Mother	NA	7	3	F	A-F	Full-Partial	4	2	1	00:31	00:35	00:23	1	4	9	2.25	left	head	0	R	R	R	0	0	Simba	Infant	off	NA	NA	NA
MAH00613	20131012	11:03	00:01:35	Sarabi	Mother	NA	7	3	F	A-F	Full-Partial	4	3	1	00:47	00:48	00:12	1	1	2	2	left	body	1	R	R	R	0	0	Simba	Infant	off	NA	NA	NA
MAH00613	20131012	11:03	00:01:35	Sarabi	Mother	NA	7	3	F	A-F	Full-Partial	4	4	1	00:57	01:00	00:09	1	3	3	1	left	limbs	1	R	R	M	1	0	Simba	Infant	off	NA	NA	NA
MAH00615	20131012	11:16	00:01:00	Sarabi	Mother	NA	7	3	F	A-F	Full-Partial	1	1	0	00:00	00:08	NA	0	8	8	1	left	body	1	R	R	F	0	0	Simba	Infant	off	NA	NA	NA
MAH00620	20131012	11:30	00:01:53	Sarabi	Mother	NA	7	3	F	A-F	Full-Partial	1	1	0	01:21	01:32	NA	0	11	13	1.181818182	right	switch	1	F	F	F	0	0	Simba	Infant	off	NA	NA	NA
MAH00621	20131012	11:40	00:01:03	Sazu	Juvenile	NA	NA	NA	M	D-M	Full-Partial	1	1	0	00:26	00:27	NA	0	1	2	2	left	limbs	1	E	E	E	0	1	Sarabi	Mother	mot	0	NA	NA
MAH00622	20131012	11:45	00:03:00	Sarabi	Mother	NA	7	3	F	A-F	Full-Partial	2	1	1	01:45	01:49	NA	0	4	5	1.25	left	limbs	1	R	R	R	0	0	Simba+Sazu	Infant	off	NA	NA	NA
MAH00622	20131012	11:45	00:03:00	Sarabi	Mother	NA	7	3	F	A-F	Full-Partial	2	2	1	02:09	02:21	00:20	1	12	12	1	left	head	0	R	R	F	0	0	Simba+Sazu	Infant	off	NA	NA	NA
MAH00623	20131012	11:48	00:01:56	Sarabi	Mother	NA	7	3	F	A-F	Full-Partial	3	1	1	00:00	00:14	NA	0	14	14	1	right	switch	1	R	R	R	0	0	Simba	Infant	off	NA	NA	NA
MAH00623	20131012	11:48	00:01:56	Sarabi	Mother	NA	7	3	F	A-F	Full-Partial	3	2	1	00:24	00:55	00:10	1	31	17	0.548387097	right	body	1	R	R	R	0	0	Simba	Infant	off	NA	NA	NA
MAH00623	20131012	11:48	00:01:56	Sarabi	Mother	NA	7	3	F	A-F	Full-Partial	3	3	1	01:15	01:29	00:25	1	14	5	0.357142857	right	body	1	R	R	M	1	0	Simba	Infant	off	NA	NA	NA
MAH00624	20131012	11:54	00:01:40	Sazu	Juvenile	NA	NA	NA	M	D-M	Full-Partial	2	1	1	00:00	00:14	NA	0	14	14	1	left	limbs	1	R	R	R	0	1	Sarabi	Mother	mot	1	NA	NA
MAH00624	20131012	11:54	00:01:40	Sazu	Juvenile	NA	NA	NA	M	D-M	Full-Partial	2	2	1	00:28	00:59	NA	0	31	28	0.903225806	both	switch	1	R	R	M	1	1	Sarabi	Mother	mot	1	NA	NA
MAH00627	20131012	12:09	00:01:05	Sarabi	Mother	NA	7	3	F	A-F	Full-Partial	2	1	1	00:00	00:01	NA	0	1	2	2	left	body	1	F	F	F	0	0	Simba+Sazu	Infant	off	NA	NA	NA
MAH00627	20131012	12:09	00:01:05	Sarabi	Mother	NA	7	3	F	A-F	Full-Partial	2	2	1	00:40	00:46	00:39	0	6	7	1.166666667	right	body	1	F	F	M	1	0	Simba+Sazu	Infant	off	NA	NA	NA
MAH00628	20131012	12:14	00:01:26	Sarabi	Mother	NA	7	3	F	A-F	Full-Partial	1	1	0	00:22	00:35	NA	0	13	14	1.076923077	right	limbs	1	F	F	M	1	0	Simba+Sazu	Infant	off	NA	NA	NA
MAH00633	20131012	12:27	00:00:50	Sarabi	Mother	NA	7	3	F	A-F	Full-Partial	1	1	0	00:00	00:04	NA	0	4	5	1.25	left	limbs	1	F	F	M	1	0	Simba+Sazu	Infant	off	NA	NA	NA
MAH00636	20131012	12:54	00:00:48	Sarabi	Mother	NA	7	3	F	A-F	Full-Partial	1	1	0	00:24	00:26	NA	0	2	2	1	left	body	1	F	F	F	0	0	Simba+Sazu	Infant	off	NA	NA	NA
MAH00637	20131012	12:56	00:00:40	Simba	Infant	0	NA	NA	M	D-M	Full-Partial	1	1	0	00:00	00:04	NA	0	4	4	1	left	head	0	F	F	F	0	0	Sarabi	Mother	mot	NA	NA	NA
MAH00638	20131012	13:04	00:00:15	Sarabi	Mother	NA	7	3	F	A-F	Full-Partial	1	1	0	00:00	00:02	NA	0	2	3	1.5	left	limbs	1	F	F	M	1	0	Simba+Sazu	Infant	off	NA	NA	NA
MAH00643	20131012	13:35	00:02:30	Sarabi	Mother	NA	7	3	F	A-F	Full-Partial	3	1	1	00:00	00:04	NA	0	4	5	1.25	right	body	1	R	R	M	1	0	Simba+Sazu	Infant	off	NA	NA	NA
MAH00643	20131012	13:35	00:02:30	Sarabi	Mother	NA	7	3	F	A-F	Full-Partial	3	2	1	01:24	01:38	01:20	0	14	15	1.071428571	left	body	1	R	R	R	0	0	Simba+Sazu	Infant	off	NA	NA	NA
MAH00643	20131012	13:35	00:02:30	Sarabi	Mother	NA	7	3	F	A-F	Full-Partial	3	3	1	01:48	02:03	00:10	1	15	15	1	right	limbs	1	R	R	M	1	0	Simba+Sazu	Infant	off	NA	NA	NA
MAH00644	20131012	13:47	00:01:15	Sarabi	Mother	NA	7	3	F	A-F	Full-Partial	2	1	1	00:00	00:11	NA	0	11	12	1.090909091	left	head	0	R	R	R	0	0	Simba+Sazu	Infant	off	NA	NA	NA
MAH00644	20131012	13:47	00:01:15	Sarabi	Mother	NA	7	3	F	A-F	Full-Partial	2	2	1	00:38	00:43	00:27	1	5	8	1.6	left	head	0	R	R	F	0	0	Simba+Sazu	Infant	off	NA	NA	NA
MAH00645	20131012	13:50	00:01:46	Sarabi	Mother	NA	7	3	F	A-F	Full-Partial	2	1	1	00:15	00:19	NA	0	4	5	1.25	right	NA	NA	R	R	R	0	0	Simba+Sazu	Infant	off	NA	NA	NA
MAH00645	20131012	13:50	00:01:46	Sarabi	Mother	NA	7	3	F	A-F	Full-Partial	2	2	1	00:51	00:58	00:32	0	8	7	0.875	left	head	0	M	R	M	1	0	Simba+Sazu	Infant	off	NA	NA	NA
MAH00647	20131012	13:53	00:00:34	Sarabi	Mother	NA	7	3	F	A-F	Full-Partial	1	1	0	00:00	00:02	NA	0	2	3	1.5	right	limbs	1	R	R	R	0	0	Simba+Sazu	Infant	off	NA	NA	NA
MAH00650	20131012	14:18	00:01:11	Sarabi	Mother	NA	7	3	F	A-F	Full-Partial	1	1	0	00:42	00:42	NA	0	1	1	1	left	limbs	1	R	R	F	0	0	Simba+Sazu	Infant	off	NA	NA	NA
MAH00651	20131012	14:19	00:00:19	Sarabi	Mother	NA	7	3	F	A-F	Full-Partial	1	1	0	00:00	00:02	NA	0	2	2	1	right	limbs	1	M	R	M	1	0	Simba+Sazu	Infant	off	NA	NA	NA
MAH00652	20131012	14:23	00:01:08	Sarabi	Mother	NA	7	3	F	A-F	Full-Partial	2	1	1	00:00	00:01	NA	0	1	2	2	right	limbs	1	M	M	M	1	0	Simba+Sazu	Infant	off	NA	NA	NA
MAH00652	20131012	14:23	00:01:08	Sarabi	Mother	NA	7	3	F	A-F	Full-Partial	2	2	1	00:22	00:33	00:21	1	11	11	1	left	limbs	1	M	M	M	1	0	Simba+Sazu	Infant	off	NA	NA	NA
MAH00659	20131012	14:48	00:00:22	Sarabi	Mother	NA	7	3	F	A-F	Full-Partial	1	1	0	00:00	00:02	NA	0	2	3	1.5	left	body	1	?	R	F	0	0	Simba+Sazu	Infant	off	NA	NA	NA
MAH00678	20131019	07:11	00:01:11	Sarabi	Mother	NA	7	3	F	A-F	Full-Partial	1	1	0	00:17	00:22	NA	0	5	6	1.2	right	head	0	R	R	M	1	0	Simba+Sazu	Infant	off	NA	NA	NA
MAH00686	20131019	07:46	00:01:43	Sarabi	Mother	NA	7	3	F	A-F	Full-Partial	2	1	1	00:00	00:02	NA	0	2	3	1.5	right	head	0	M	M	M	1	0	Simba+Sazu	Infant	off	NA	NA	NA
MAH00686	20131019	07:46	00:01:43	Sarabi	Mother	NA	7	3	F	A-F	Full-Partial	2	2	1	00:46	00:53	00:44	0	7	6	0.857142857	left	body	1	F	F	F	0	0	Simba+Sazu	Infant	off	NA	NA	NA
MAH00689	20131019	08:02	00:02:40	Sarabi	Mother	NA	7	3	F	A-F	Full-Partial	3	1	1	00:00	00:16	NA	0	16	17	1.0625	left	limbs	1	?	R	F	0	0	Simba+Sazu	Infant	off	NA	NA	NA
MAH00689	20131019	08:02	00:02:40	Sarabi	Mother	NA	7	3	F	A-F	Full-Partial	3	2	1	01:05	01:07	00:49	0	2	3	1.5	left	head	0	M	R	R	0	0	Simba+Sazu	Infant	off	NA	NA	NA
MAH00689	20131019	08:02	00:02:40	Sarabi	Mother	NA	7	3	F	A-F	Full-Partial	3	3	1	01:26	01:37	00:19	1	11	14	1.272727273	left	switch	1	R	R	M	1	0	Simba+Sazu	Infant	off	NA	NA	NA
MAH00692	20131019	08:14	00:02:26	Sarabi	Mother	NA	7	3	F	A-F	Full-Partial	2	1	1	00:00	00:02	NA	0	2	3	1.5	left	NA	NA	M	R	R	0	0	Simba+Sazu	Infant	off	NA	NA	NA
MAH00692	20131019	08:14	00:02:26	Sarabi	Mother	NA	7	3	F	A-F	Full-Partial	2	2	1	01:16	01:29	01:14	0	13	12	0.923076923	left	head	0	M	M	F	0	0	Simba+Sazu	Infant	off	NA	NA	NA
MAH00695	20131019	08:33	00:06:19	Sarabi	Mother	NA	7	3	F	A-F	Full-Partial	2	1	1	00:18	00:26	NA	0	8	9	1.125	left	limbs	1	M	M	R	0	1	Sazu	Juvenile	oth	1	1	NA
MAH00695	20131019	08:33	00:06:19	Sarabi	Mother	NA	7	3	F	A-F	Full-Partial	2	2	1	02:07	02:14	01:41	0	7	8	1.142857143	right	body	1	R	R	R	0	0	Simba+Sazu	Infant	off	NA	NA	NA
MAH00695	20131019	08:33	00:06:19	Sazu	Juvenile	NA	NA	NA	M	D-M	Full-Partial	1	1	0	05:03	05:25	NA	0	22	19	0.863636364	left	switch	1	M	R	M	1	1	Sarabi	Mother	mot	1	1	NA
MAH00698	20131019	08:54	00:01:24	Sarabi	Mother	NA	7	3	F	A-F	Full-Partial	1	1	0	00:00	00:04	NA	0	4	5	1.25	left	NA	NA	M	R	R	0	0	Simba+Sazu	Infant	off	NA	NA	NA
MAH00700	20131019	09:04	00:01:05	Sarabi	Mother	NA	7	3	F	A-F	Full-Partial	1	1	0	00:00	00:02	NA	0	2	5	2.5	right	head	0	F	F	F	0	0	Simba+Sazu	Infant	off	NA	NA	NA
MAH00704	20131019	10:02	00:04:29	Sarabi	Mother	NA	7	3	F	A-F	Full-Partial	1	1	0	00:13	00:14	NA	0	1	2	2	right	head	0	F	F	F	0	0	Simba+Sazu	Infant	off	NA	NA	NA
MAH00708	20131019	11:42	00:02:48	Sarabi	Mother	NA	7	3	F	A-F	Full-Partial	4	1	1	00:00	00:03	NA	0	3	4	1.333333333	left	limbs	1	R	R	R	0	0	Simba+Sazu	Infant	off	NA	NA	NA
MAH00708	20131019	11:42	00:02:48	Sarabi	Mother	NA	7	3	F	A-F	Full-Partial	4	2	1	00:37	00:49	00:34	0	12	14	1.166666667	right	body	1	R	R	R	0	0	Simba+Sazu	Infant	off	NA	NA	NA
MAH00708	20131019	11:42	00:02:48	Sarabi	Mother	NA	7	3	F	A-F	Full-Partial	4	3	1	00:58	01:10	00:09	1	12	14	1.166666667	right	head	0	R	R	R	0	0	Simba+Sazu	Infant	off	NA	NA	NA
MAH00708	20131019	11:42	00:02:48	Sarabi	Mother	NA	7	3	F	A-F	Full-Partial	4	4	1	01:24	01:45	00:14	1	21	23	1.095238095	left	body	1	R	R	R	0	0	Simba+Sazu	Infant	off	NA	NA	NA
MAH00709	20131019	11:45	00:02:40	Sarabi	Mother	NA	7	3	F	A-F	Full-Partial	2	1	1	01:18	01:36	NA	0	18	19	1.055555556	left	head	0	M	R	M	1	1	Sazu	Juvenile	oth	1	1	NA
MAH00709	20131019	11:45	00:02:40	Sarabi	Mother	NA	7	3	F	A-F	Full-Partial	2	2	1	01:57	02:02	00:21	1	5	6	1.2	right	limbs	1	M	R	M	1	1	Sazu	Juvenile	oth	1	1	NA
MAH00712	20131019	12:12	00:00:53	Simba	Infant	0	NA	NA	M	D-M	Full-Partial	2	1	1	00:00	00:04	NA	0	4	4	1	right	limbs	1	M	M	M	1	0	Sarabi	Mother	mot	NA	NA	NA
MAH00712	20131019	12:12	00:00:53	Simba	Infant	0	NA	NA	M	D-M	Full-Partial	2	1	1	00:19	00:44	00:15	1	25	22	0.88	right	body	1	M	M	M	1	0	Sarabi	Mother	mot	NA	NA	NA
MAH00714	20131019	12:34	00:01:16	Sarabi	Mother	NA	7	3	F	A-F	Full-Partial	2	1	1	00:00	00:02	NA	0	2	3	1.5	left	limbs	1	F	R	M	1	0	Simba+Sazu	Infant	off	NA	NA	NA
MAH00714	20131019	12:34	00:01:16	Sarabi	Mother	NA	7	3	F	A-F	Full-Partial	2	2	1	00:18	00:34	00:16	1	16	14	0.875	right	body	1	M	R	M	1	0	Simba+Sazu	Infant	off	NA	NA	NA
MAH00719	20131019	13:24	00:02:00	Sarabi	Mother	NA	7	3	F	A-F	Full-Partial	2	1	1	00:34	00:39	NA	0	5	7	1.4	left	head	0	F	F	F	0	0	Simba+Sazu	Infant	off	NA	NA	NA
MAH00719	20131019	13:24	00:02:00	Sarabi	Mother	NA	7	3	F	A-F	Full-Partial	2	2	1	01:02	01:06	00:23	1	4	7	1.75	left	head	0	F	F	F	0	0	Simba+Sazu	Infant	off	NA	NA	NA
MAH00720	20131019	13:26	00:01:33	Sazu	Juvenile	NA	NA	NA	M	D-M	Full-Partial	1	1	0	00:40	00:52	NA	0	12	13	1.083333333	left	body	1	F	M	M	1	1	Sarabi	Mother	mot	0	1	NA
MAH00729	20131019	13:57	00:00:40	Sarabi	Mother	NA	7	3	F	A-F	Full-Partial	1	1	0	00:00	00:04	NA	0	4	5	1.25	right	limbs	1	F	F	F	0	0	Simba+Sazu	Infant	off	NA	NA	NA
MAH00730	20131019	13:59	00:00:00	Sarabi	Mother	NA	7	3	F	A-F	Full-Partial	1	1	0	00:00	00:01	NA	0	NA	NA	NA	left	head	0	F	R	R	0	0	Simba+Sazu	Infant	off	NA	NA	NA
MAH00733	20131019	14:39	00:11:25	Sarabi	Mother	NA	7	3	F	A-F	Full-Partial	5	1	1	03:54	04:10	NA	0	16	16	1	right	body	1	R	R	R	0	1	Sazu	Juvenile	oth	0	0	NA
MAH00733	20131019	14:39	00:11:25	Sarabi	Mother	NA	7	3	F	A-F	Full-Partial	7	2	1	04:50	04:55	00:40	0	5	8	1.6	right	head	0	R	R	R	0	1	Sazu	Juvenile	oth	0	0	NA
MAH00733	20131019	14:39	00:11:25	Sarabi	Mother	NA	7	3	F	A-F	Full-Partial	7	3	1	07:56	08:06	03:01	0	10	14	1.4	right	limbs	1	R	R	R	0	1	Sazu	Juvenile	oth	0	0	NA
MAH00733	20131019	14:39	00:11:25	Sarabi	Mother	NA	7	3	F	A-F	Full-Partial	7	4	1	08:42	08:48	00:36	0	6	8	1.333333333	right	limbs	1	F	F	F	0	1	Sazu	Juvenile	oth	0	0	NA
MAH00733	20131019	14:39	00:11:25	Sarabi	Mother	NA	7	3	F	A-F	Full-Partial	7	5	1	09:48	10:02	01:00	0	14	13	0.928571429	right	limbs	1	M	R	R	0	0	Simba+Sazu	Infant	off	NA	NA	NA
MAH00733	20131019	14:39	00:11:25	Sarabi	Mother	NA	7	3	F	A-F	Full-Partial	7	6	1	10:12	10:22	00:10	1	10	13	1.3	right	limbs	1	R	R	F	0	0	Simba+Sazu	Infant	off	NA	NA	NA
MAH00733	20131019	14:39	00:11:25	Sarabi	Mother	NA	7	3	F	A-F	Full-Partial	7	7	1	10:39	10:47	00:17	1	8	9	1.125	right	limbs	1	F	F	M	1	0	Simba+Sazu	Infant	off	NA	NA	NA
MAH00735	20131019	15:42	00:02:08	Sarabi	Mother	NA	7	3	F	A-F	Full-Partial	1	1	0	00:00	00:04	NA	0	4	6	1.5	left	head	0	F	F	F	0	0	Simba+Sazu	Infant	off	NA	NA	NA
MAH00736	20131019	15:46	00:01:44	Sarabi	Mother	NA	7	3	F	A-F	Full-Partial	2	1	1	00:00	00:03	NA	0	3	2	0.666666667	left	limbs	1	M	R	R	0	0	Simba+Sazu	Infant	off	NA	NA	NA
MAH00736	20131019	15:46	00:01:44	Sarabi	Mother	NA	7	3	F	A-F	Full-Partial	2	2	1	00:41	00:48	00:38	0	7	8	1.142857143	left	limbs	1	R	R	M	1	0	Simba+Sazu	Infant	off	NA	NA	NA
MAH00749	20131019	16:49	00:04:31	Simba	Infant	0	NA	NA	M	D-M	Full-Partial	1	1	0	00:00	00:07	NA	0	7	8	1.142857143	left	body	1	R	R	R	0	0	Sarabi	Mother	mot	NA	NA	NA
MAH00749	20131019	16:49	00:04:31	Sarabi	Mother	NA	7	3	F	A-F	Full-Partial	1	1	0	01:12	01:17	NA	0	5	6	1.2	right	body	1	R	R	F	0	0	Simba+Sazu	Infant	off	NA	NA	NA
MAH00750	20131019	16:54	00:00:30	Sarabi	Mother	NA	7	3	F	A-F	Full-Partial	1	1	0	00:00	00:05	NA	0	5	7	1.4	right	limbs	1	F	F	F	0	0	Simba+Sazu	Infant	off	NA	NA	NA
MAH01009	20131030	06:34	00:01:30	Chindy	Adolescent	10	NA	NA	F	D-F	Full	1	1	0	00:00	00:12	NA	0	12	15	1.25	right	switch	1	F	F	M	1	1	Cissy+Cinnamon	Mother	mot	1	0	NA
MAH01011	20131030	06:47	00:01:21	Chindy	Adolescent	10	NA	NA	F	D-F	Full	1	1	0	00:26	00:39	NA	0	13	17	1.307692308	left	body	1	F	F	M	1	1	Cissy+Cinnamon	Mother	mot	1	0	NA
MAH01011	20131030	06:47	00:01:21	Cissy	Mother	45	19	4	F	A-F	Full	1	1	0	01:14	01:17	NA	0	3	4	1.333333333	left	limbs	1	F	F	F	0	1	Cinnamon	Infant	off	NA	NA	NA
MAH01012	20131030	06:52	00:04:18	Cissy	Mother	45	19	4	F	A-F	Full	3	1	1	00:00	00:12	NA	0	12	17	1.416666667	both	limbs	1	F	F	F	0	1	Cinnamon	Infant	off	NA	NA	NA
MAH01012	20131030	06:52	00:04:18	Cissy	Mother	45	19	4	F	A-F	Full	3	2	1	00:31	00:43	00:19	1	12	16	1.333333333	left	body	1	F	F	F	0	1	Cinnamon	Infant	off	NA	NA	NA
MAH01012	20131030	06:52	00:04:18	Cissy	Mother	45	19	4	F	A-F	Full	3	3	1	01:39	01:57	00:56	0	18	28	1.555555556	left	switch	1	F	F	F	0	1	Cinnamon	Infant	off	NA	NA	NA
MAH01017	20131030	07:20	00:00:25	Cissy	Mother	45	19	4	F	A-F	Full	1	1	0	00:00	00:03	NA	0	3	4	1.333333333	left	body	1	R	R	M	1	1	Cinnamon	Infant	off	NA	1	NA
MAH00120	20130920	15:46	00:00:37	Cinnamon	Infant	1	NA	NA	F	D-F	Full	1	1	0	00:03	00:14	NA	0	13	16	1.230769231	right	body	1	M	M	M	1	0	Cissy	Mother	mot	NA	NA	NA
MAH01029	20131030	08:24	00:01:01	Cissy	Mother	45	19	4	F	A-F	Full	1	1	0	00:17	00:29	NA	0	12	4	0.333333333	right	limbs	1	M	M	M	1	1	Cinnamon	Infant	off	0	1	NA
MAH01031	20131030	08:29	00:01:06	Cissy	Mother	45	19	4	F	A-F	Full	1	1	0	00:31	00:44	NA	0	13	15	1.153846154	left	body	1	R	M	M	1	1	Cinnamon	Infant	off	0	0	NA
MAH01040	20131030	09:47	00:00:29	Cinnamon	Infant	1	NA	NA	F	D-F	Full	1	1	0	00:00	00:06	NA	0	6	7	1.166666667	left	body	1	M	M	M	1	1	Cissy	Mother	mot	1	1	NA
MAH01042	20131030	09:49	00:00:30	Cissy	Mother	45	19	4	F	A-F	Full	1	1	0	00:00	00:02	NA	0	2	3	1.5	right	NA	NA	R	R	M	1	1	Cinnamon	Infant	off	0	0	NA
MAH01047	20131030	10:19	00:03:21	Chindy	Adolescent	10	NA	NA	F	D-F	Full	1	1	0	00:36	00:40	NA	0	4	5	1.25	right	body	1	F	F	F	0	1	?	UnflangedNAMale	oth	NA	NA	NA
MAH01048	20131030	10:33	00:06:05	Cissy	Mother	45	19	4	F	A-F	Full	2	1	1	00:00	00:05	NA	0	5	7	1.4	left	head	1	F	F	F	0	1	Cinnamon	Infant	off	0	0	NA
MAH01048	20131030	10:33	00:06:05	Cissy	Mother	45	19	4	F	A-F	Full	2	2	1	01:06	01:11	01:01	0	5	6	1.2	right	head	0	F	F	F	0	1	Cinnamon	Infant	off	0	0	NA
MAH01049	20131030	10:42	00:00:21	Cissy	Mother	45	19	4	F	A-F	Full	1	1	0	00:00	00:08	NA	0	8	11	1.375	right	head	0	R	M	M	1	1	Cinnamon	Infant	off	1	1	NA
MAH01054	20131030	11:06	00:02:41	Cissy	Mother	45	19	4	F	A-F	Full	2	1	1	00:00	00:02	NA	0	2	3	1.5	left	body	1	F	F	F	0	1	Cinnamon	Infant	off	0	0	NA
MAH01054	20131030	11:06	00:02:41	Cissy	Mother	45	19	4	F	A-F	Full	2	2	1	00:06	00:07	00:04	1	1	2	2	left	limbs	1	F	F	F	0	1	Cinnamon	Infant	off	0	0	NA
MAH01054	20131030	11:06	00:02:41	Cinnamon	Infant	1	NA	NA	F	D-F	Full	1	1	0	01:53	02:13	NA	0	20	19	0.95	right	switch	1	F	R	F	0	1	Cissy	Mother	mot	0	1	NA
MAH01055	20131030	11:08	00:00:52	Cissy	Mother	45	19	4	F	A-F	Full	1	1	0	00:00	00:04	NA	0	4	5	1.25	left	head	0	F	F	F	0	1	Cinnamon	Infant	off	0	0	NA
MAH01057	20131030	11:20	00:01:01	Cissy	Mother	45	19	4	F	A-F	Full	1	1	0	00:00	00:04	NA	0	4	5	1.25	left	head	0	F	F	F	0	1	Cinnamon	Infant	off	1	0	NA
MAH01062	20131030	12:02	00:02:34	Cinnamon	Infant	1	NA	NA	F	D-F	Full	1	1	0	02:00	02:06	NA	0	6	10	1.666666667	left	body	1	P	P	M	1	1	?	UnflangedNAMale	oth	1	1	NA
MAH01064	20131030	12:09	00:02:26	Cinnamon	Infant	1	NA	NA	F	D-F	Full	1	1	0	00:00	00:06	NA	0	6	8	1.333333333	left	body	1	R	R	F	0	1	Cissy	Mother	mot	0	0	NA
MAH01067	20131030	12:33	00:01:36	Cissy	Mother	45	19	4	F	A-F	Full	1	1	0	00:00	00:02	NA	0	2	3	1.5	right	limbs	1	F	F	F	0	1	Cinnamon	Infant	off	1	0	NA
MAH01069	20131030	12:40	00:01:20	Cinnamon	Infant	1	NA	NA	F	D-F	Full	1	1	0	00:20	00:35	NA	0	15	26	1.733333333	left	limbs	1	P	P	P	0	1	Cissy	Mother	mot	0	0	NA
MAH01071	20131030	12:44	00:03:01	Cissy	Mother	45	19	4	F	A-F	Full	1	1	0	01:04	01:09	NA	0	5	7	1.4	right	head	0	F	F	F	0	1	Cinnamon	Infant	off	0	0	NA
MAH01075	20131030	13:01	00:01:27	Cissy	Mother	45	19	4	F	A-F	Full	1	1	0	00:00	00:08	NA	0	5	12	2.4	left	head	0	F	F	F	0	1	Cinnamon	Infant	off	0	0	NA
MAH01077	20131030	13:11	00:01:59	Cissy	Mother	45	19	4	F	A-F	Full	1	1	0	00:00	00:01	NA	0	NA	15	NA	both	limbs	1	M	R	M	1	1	Cinnamon	Infant	off	1	1	NA
MAH01078	20131030	13:12	00:01:13	Chindy	Adolescent	10	NA	NA	F	D-F	Full	1	1	0	00:00	00:05	NA	0	5	6	1.2	right	body	1	F	F	F	0	0	NA	NA	NA	NA	NA	NA
MAH01079	20131030	13:25	00:03:20	Cissy	Mother	45	19	4	F	A-F	Full	2	1	1	00:41	00:44	NA	0	3	4	1.333333333	left	head	0	F	F	F	0	1	Cinnamon	Infant	off	1	1	NA
MAH01079	20131030	13:25	00:03:20	Cissy	Mother	45	19	4	F	A-F	Full	2	2	1	02:59	03:01	02:15	0	2	3	1.5	left	limbs	1	F	M	F	0	1	Cinnamon	Infant	off	NA	NA	NA
MAH01080	20131030	13:34	00:07:33	Cissy	Mother	45	19	4	F	A-F	Full	3	1	1	00:48	01:02	NA	0	14	16	1.142857143	right	body	1	F	R	F	0	1	Cinnamon	Infant	off	1	1	NA
MAH01080	20131030	13:34	00:07:33	Cissy	Mother	45	19	4	F	A-F	Full	3	2	1	02:02	02:10	01:00	0	8	10	1.25	left	body	1	M	R	R	0	1	Cinnamon	Infant	off	1	1	NA
MAH01080	20131030	13:34	00:07:33	Cissy	Mother	45	19	4	F	A-F	Full	3	3	1	02:24	02:25	00:14	1	1	2	2	left	limbs	1	R	M	M	1	0	Cinnamon	Infant	off	NA	NA	NA
MAH01082	20131030	13:42	00:02:40	Chindy	Adolescent	10	NA	NA	F	D-F	Full	2	1	1	00:42	00:47	NA	0	5	6	1.2	left	body	1	M	R	M	1	0	NA	NA	NA	NA	NA	NA
MAH01082	20131030	13:42	00:02:40	Chindy	Adolescent	10	NA	NA	F	D-F	Full	2	2	1	01:28	01:41	00:41	0	13	15	1.153846154	right	body	1	M	R	F	0	1	Cissy+Cinnamon	Mother	mot	1	0	NA
MAH01084	20131030	13:57	00:00:47	Cinnamon	Infant	1	NA	NA	F	D-F	Full	1	1	0	00:08	00:14	NA	0	6	10	1.666666667	left	body	1	F	F	M	1	1	Chindy	Sibling	oth	1	0	NA
MAH01089	20131030	14:19	00:00:20	Chindy	Adolescent	10	NA	NA	F	D-F	Full	1	1	0	00:00	00:01	NA	0	1	2	2	right	body	1	F	F	F	0	0	NA	NA	NA	NA	NA	NA
MAH01086	20131030	14:08	00:01:22	Cissy	Mother	45	19	4	F	A-F	Full	2	1	1	00:00	00:01	NA	0	NA	NA	NA	left	switch	1	?	R	M	1	1	Cinnamon	Infant	off	1	1	NA
MAH01086	20131030	14:08	00:01:22	Cissy	Mother	45	19	4	F	A-F	Full	2	2	1	00:35	00:40	00:34	0	5	7	1.4	left	body	1	M	R	M	1	1	Cinnamon	Infant	off	1	0	NA
MAH01093	20131030	15:02	00:00:53	Cissy	Mother	45	19	4	F	A-F	Full	2	1	1	00:00	00:00	NA	0	NA	7	NA	left	limbs	1	F	R	R	0	1	Cinnamon	Infant	off	1	1	NA
MAH01093	20131030	15:02	00:00:53	Cissy	Mother	45	19	4	F	A-F	Full	2	2	1	00:11	00:13	00:11	1	2	3	1.5	left	limbs	1	R	R	F	0	1	Cinnamon	Infant	off	1	1	NA
MAH01098	20131030	15:26	00:01:31	Cissy	Mother	45	19	4	F	A-F	Full	3	1	1	00:00	00:10	NA	0	10	15	1.5	right	body	1	R	F	F	0	1	Cinnamon	Infant	off	0	1	NA
MAH01098	20131030	15:26	00:01:31	Cissy	Mother	45	19	4	F	A-F	Full	3	2	1	00:34	00:35	00:24	1	1	2	2	right	body	1	F	F	F	0	1	Cinnamon	Infant	off	0	1	NA
MAH01098	20131030	15:26	00:01:31	Cissy	Mother	45	19	4	F	A-F	Full	3	3	1	01:03	01:08	00:28	1	5	7	1.4	right	limbs	1	F	F	F	0	1	Cinnamon	Infant	off	1	1	NA
MAH01101	20131030	15:35	00:04:24	Cissy	Mother	45	19	4	F	A-F	Full	4	1	1	00:00	00:19	NA	0	19	28	1.473684211	left	head	0	R	R	R	0	1	Cinnamon	Infant	off	0	0	NA
MAH01101	20131030	15:35	00:04:24	Cissy	Mother	45	19	4	F	A-F	Full	4	2	1	01:01	01:10	00:42	0	9	13	1.444444444	left	head	0	R	R	R	0	1	Cinnamon	Infant	off	0	0	NA
MAH01101	20131030	15:35	00:04:24	Cissy	Mother	45	19	4	F	A-F	Full	4	3	1	01:48	01:55	00:38	0	7	9	1.285714286	left	switch	1	R	R	R	0	1	Cinnamon	Infant	off	0	0	NA
MAH01101	20131030	15:35	00:04:24	Cissy	Mother	45	19	4	F	A-F	Full	4	4	1	02:35	02:53	00:40	0	18	20	1.111111111	right	head	0	M	R	M	1	1	Cinnamon	Infant	off	0	1	NA
MAH01103	20131030	15:56	00:00:40	Cissy	Mother	45	19	4	F	A-F	Full	1	1	0	00:00	00:04	NA	0	3	4	1.333333333	right	head	0	F	F	F	0	1	Cinnamon	Infant	off	NA	NA	NA
MAH01104	20131030	16:03	00:01:48	Cissy	Mother	45	19	4	F	A-F	Full	1	1	0	00:37	00:38	NA	0	1	2	2	right	limbs	1	R	R	M	1	1	Cinnamon	Infant	off	1	0	NA
MAH01104	20131030	16:03	00:01:48	Cinnamon	Infant	1	NA	NA	F	D-F	Full	1	1	0	01:00	01:07	NA	0	7	13	1.857142857	right	body	1	R	M	M	1	1	Cissy	Mother	mot	1	0	NA
MAH01108	20131030	16:24	00:00:29	Cissy	Mother	45	19	4	F	A-F	Full	1	1	0	00:00	00:03	NA	0	3	4	1.333333333	right	body	1	F	M	M	1	1	Cinnamon	Infant	off	0	1	NA
MAH01109	20131030	16:36	00:03:25	Cissy	Mother	45	19	4	F	A-F	Full	1	1	0	00:00	00:03	NA	0	3	4	1.333333333	right	body	1	F	R	F	0	1	Cinnamon	Infant	off	0	1	NA
MAH01109	20131030	16:36	00:03:25	Cinnamon	Infant	1	NA	NA	F	D-F	Full	1	1	0	02:26	02:30	NA	0	5	6	1.2	left	limbs	1	F	R	F	0	1	Cissy	Mother	mot	1	1	NA
MAH01111	20131030	16:42	00:03:03	Cissy	Mother	45	19	4	F	A-F	Full	3	1	1	00:00	00:09	NA	0	9	12	1.333333333	right	body	1	F	R	F	0	1	Cinnamon	Infant	off	0	1	NA
MAH01111	20131030	16:42	00:03:03	Cissy	Mother	45	19	4	F	A-F	Full	3	2	1	00:29	00:31	00:20	1	2	3	1.5	right	limbs	1	F	R	F	0	1	Cinnamon	Infant	off	1	1	NA
MAH01111	20131030	16:42	00:03:03	Cissy	Mother	45	19	4	F	A-F	Full	3	3	1	00:57	01:03	00:26	1	6	7	1.166666667	right	limbs	1	F	R	M	1	1	Cinnamon	Infant	off	1	1	NA
MAH01111	20131030	16:42	00:03:03	Cinnamon	Infant	1	NA	NA	F	D-F	Full	1	1	0	00:33	00:43	NA	0	10	6	0.6	left	limbs	1	P	R	F	0	1	Cissy	Mother	mot	1	1	NA
MAH01116	20131030	17:01	00:01:33	Cissy	Mother	45	19	4	F	A-F	Full	1	1	0	00:00	00:03	NA	0	3	4	1.333333333	right	body	1	F	F	F	0	1	Cinnamon	Infant	off	0	0	NA
MAH01118	20131030	17:08	00:01:20	Cissy	Mother	45	19	4	F	A-F	Full	1	1	0	00:49	00:57	NA	0	8	9	1.125	left	head	1	R	R	M	1	0	Cinnamon	Infant	off	NA	NA	NA
MAH01119	20131101	09:29	00:07:22	Cinnamon	Infant	1	NA	NA	F	D-F	Full	1	1	0	05:39	05:49	NA	0	10	15	1.5	left	body	1	E	E	E	0	1	Cissy	Mother	mot	1	1	NA
MAH01122	20131101	09:42	00:02:05	Cissy	Mother	45	19	4	F	A-F	Full	2	1	1	00:33	00:40	NA	0	7	11	1.571428571	left	limbs	1	M	R	F	0	0	Cinnamon	Infant	off	NA	NA	NA
MAH01122	20131101	09:42	00:02:05	Cissy	Mother	45	19	4	F	A-F	Full	2	2	1	01:21	01:24	00:41	0	3	3	1	left	body	1	M	R	F	0	1	Cinnamon	Infant	off	0	1	NA
MAH01122	20131101	09:42	00:02:05	Cinnamon	Infant	1	NA	NA	F	D-F	Full	1	1	0	00:57	01:06	NA	0	9	10	1.111111111	right	body	1	M	M	M	1	1	Cissy	Mother	mot	NA	0	NA
MAH01123	20131101	10:02	00:00:58	Cissy	Mother	45	19	4	F	A-F	Full	2	1	1	00:00	00:01	NA	0	1	2	2	left	head	0	F	R	M	1	1	Cinnamon	Infant	off	0	1	NA
MAH01123	20131101	10:02	00:00:58	Cissy	Mother	45	19	4	F	A-F	Full	2	2	1	00:25	00:27	00:24	1	2	3	1.5	left	body	1	R	R	M	1	1	Cinnamon	Infant	off	0	1	NA
MAH01124	20131101	10:10	00:02:00	Cissy	Mother	45	19	4	F	A-F	Full	2	1	1	01:03	01:23	NA	0	21	22	1.047619048	both	limbs	1	M	R	R	0	1	Cinnamon	Infant	off	1	0	NA
MAH01124	20131101	10:10	00:02:00	Cissy	Mother	45	19	4	F	A-F	Full	2	2	1	01:30	01:33	00:07	1	3	4	1.333333333	right	switch	1	R	R	M	1	1	Cinnamon	Infant	off	1	0	NA
MAH01129	20131101	10:40	00:02:16	Cissy	Mother	45	19	4	F	A-F	Full	2	1	1	01:28	01:34	NA	0	6	8	1.333333333	left	body	1	F	F	F	0	1	Cinnamon	Infant	off	0	0	NA
MAH01129	20131101	10:40	00:02:16	Cissy	Mother	45	19	4	F	A-F	Full	2	2	1	01:41	01:44	00:07	1	3	4	1.333333333	left	body	1	F	F	F	0	1	Cinnamon	Infant	off	0	0	NA
MAH01130	20131101	10:48	00:07:20	Cissy	Mother	45	19	4	F	A-F	Full	1	1	0	02:38	02:39	NA	0	1	2	2	left	body	1	F	R	F	0	1	Cinnamon	Infant	off	1	0	NA
MAH01132	20131101	11:04	00:06:41	Cissy	Mother	45	19	4	F	A-F	Full	3	1	1	00:00	00:09	NA	0	9	11	1.222222222	right	limbs	1	F	F	F	0	1	Cinnamon	Infant	off	1	1	NA
MAH01132	20131101	11:04	00:06:41	Cissy	Mother	45	19	4	F	A-F	Full	3	2	1	01:32	01:40	01:23	0	8	7	0.875	left	head	0	F	F	F	0	1	Cinnamon	Infant	off	1	1	NA
MAH01132	20131101	11:04	00:06:41	Cissy	Mother	45	19	4	F	A-F	Full	3	3	1	04:31	04:40	02:51	0	8	12	1.5	left	body	1	M	F	M	1	1	Cinnamon	Infant	off	1	1	NA
MAH01133	20131101	11:05	00:01:18	Cinnamon	Infant	1	NA	NA	F	D-F	Full	1	1	0	00:00	00:03	NA	0	3	4	1.333333333	right	head	0	F	F	F	0	1	Cissy	Mother	mot	1	0	NA
MAH01134	20131101	11:12	00:03:19	Cinnamon	Infant	1	NA	NA	F	D-F	Full	2	1	1	00:59	01:06	NA	0	7	9	1.285714286	left	head	0	F	F	F	0	1	Cissy	Mother	mot	1	0	NA
MAH01134	20131101	11:12	00:03:19	Cinnamon	Infant	1	NA	NA	F	D-F	Full	2	2	1	01:49	02:06	NA	0	17	27	1.588235294	left	body	1	F	F	F	0	1	Cissy	Mother	mot	0	0	NA
MAH01134	20131101	11:12	00:03:19	Cissy	Mother	45	19	4	F	A-F	Full	1	1	0	02:16	02:31	NA	0	15	17	1.133333333	right	switch	1	F	F	F	0	1	Cinnamon	Infant	off	0	0	NA
MAH01135	20131101	11:13	00:01:07	Cinnamon	Infant	1	NA	NA	F	D-F	Full	1	1	0	00:00	00:12	NA	0	12	20	1.666666667	left	body	1	F	R	F	0	1	Cissy	Mother	mot	0	0	NA
MAH01136	20131101	11:20	00:02:58	Cissy	Mother	45	19	4	F	A-F	Full	1	1	0	02:17	02:18	NA	0	1	2	2	right	limbs	1	F	M	M	1	1	Cinnamon	Infant	off	1	1	NA
MAH01138	20131101	11:29	00:02:00	Cinnamon	Infant	1	NA	NA	F	D-F	Full	2	1	1	00:00	00:01	NA	0	1	2	2	right	head	0	F	R	F	0	1	Cissy	Mother	mot	0	0	NA
MAH01138	20131101	11:29	00:02:00	Cinnamon	Infant	1	NA	NA	F	D-F	Full	2	2	1	00:09	00:19	NA	0	10	15	1.5	right	body	1	P	P	P	0	1	Cissy	Mother	mot	0	0	NA
MAH01142	20131101	11:47	00:01:57	Cissy	Mother	45	19	4	F	A-F	Full	3	1	1	00:00	00:16	NA	0	16	25	1.5625	left	body	1	E	R	R	0	1	Cinnamon	Infant	off	1	1	NA
MAH01142	20131101	11:47	00:01:57	Cissy	Mother	45	19	4	F	A-F	Full	3	2	1	00:38	00:43	00:22	1	5	5	1	left	switch	1	R	R	F	0	1	Cinnamon	Infant	off	1	1	NA
MAH01142	20131101	11:47	00:01:57	Cissy	Mother	45	19	4	F	A-F	Full	3	3	1	00:54	00:56	00:11	1	2	3	1.5	left	body	1	M	R	M	1	1	Cinnamon	Infant	off	1	1	NA
MAH01146	20131101	12:05	00:02:11	Cissy	Mother	45	19	4	F	A-F	Full	1	1	0	01:30	01:33	NA	0	3	6	2	right	head	0	F	F	F	0	1	Cinnamon	Infant	off	0	NA	NA
MAH01147	20131101	12:15	00:01:14	Cissy	Mother	45	19	4	F	A-F	Full	1	1	0	00:00	00:03	NA	0	3	4	1.333333333	right	body	1	F	M	M	1	1	Cinnamon	Infant	off	1	NA	NA
MAH01148	20131101	12:22	00:01:34	Cissy	Mother	45	19	4	F	A-F	Full	1	1	0	00:06	00:10	NA	0	4	4	1	left	body	1	M	R	M	1	1	Cinnamon	Infant	off	1	1	NA
MAH01150	20131101	12:40	00:03:51	Cissy	Mother	45	19	4	F	A-F	Full	1	1	0	00:39	00:45	NA	0	6	7	1.166666667	right	body	1	M	R	M	1	1	Cinnamon	Infant	off	1	1	NA
MAH01151	20131101	12:47	00:00:41	Cissy	Mother	45	19	4	F	A-F	Full	1	1	0	00:00	00:04	NA	0	4	5	1.25	right	limbs	1	F	F	F	0	1	Cinnamon	Infant	off	0	0	NA
MAH01152	20131101	12:54	00:00:49	Cissy	Mother	45	19	4	F	A-F	Full	1	1	0	00:00	00:06	NA	0	6	8	1.333333333	both	body	1	F	F	F	0	1	Cinnamon	Infant	off	1	0	NA
MAH01153	20131101	13:08	00:00:49	Cissy	Mother	45	19	4	F	A-F	Full	1	1	0	NA	NA	NA	NA	8	10	1.25	NA	head	0	M	R	M	1	1	Cinnamon	Infant	off	1	1	NA
MAH01162	20131101	13:50	00:00:19	Cinnamon	Infant	1	NA	NA	F	D-F	Full	1	1	0	00:00	00:05	NA	0	5	8	1.6	right	head	0	F	F	F	0	1	Cissy	Mother	mot	0	0	NA
MAH01163	20131101	13:57	00:00:20	Cinnamon	Infant	1	NA	NA	F	D-F	Full	1	1	0	00:00	00:04	NA	0	4	8	2	left	body	1	F	R	F	0	1	Cissy	Mother	mot	1	0	NA
MAH01165	20131101	14:18	00:04:27	Cinnamon	Infant	1	NA	NA	F	D-F	Full	1	1	0	00:59	01:11	NA	0	12	16	1.333333333	right	body	1	R	R	P	0	1	Cissy	Mother	mot	1	0	NA
MAH01174	20131101	16:04	00:02:15	Cissy	Mother	45	19	4	F	A-F	Full	1	1	0	00:00	00:10	NA	0	10	14	1.4	right	body	1	F	F	F	0	1	Cinnamon	Infant	off	0	1	NA
MAH01175	20131101	16:10	00:01:24	Cissy	Mother	45	19	4	F	A-F	Full	1	1	0	00:00	00:06	NA	0	6	7	1.166666667	right	body	1	F	R	F	0	1	Cinnamon	Infant	off	1	1	NA
MAH01177	20131101	16:15	00:00:48	Cissy	Mother	45	19	4	F	A-F	Full	1	1	0	00:00	00:06	NA	0	6	8	1.333333333	right	head	0	F	R	F	0	1	Cinnamon	Infant	off	1	1	NA
MAH01179	20131101	16:20	00:01:00	Cissy	Mother	45	19	4	F	A-F	Full	1	1	0	00:00	00:04	NA	0	4	6	1.5	right	body	1	M	M	F	0	1	Cinnamon	Infant	off	0	0	NA
MAH01182	20131101	16:26	00:00:50	Cissy	Mother	45	19	4	F	A-F	Full	1	1	0	00:00	00:09	NA	0	9	12	1.333333333	left	switch	1	M	R	M	1	0	Cinnamon	Infant	off	NA	NA	NA
MAH01185	20131101	16:40	00:11:00	Cinnamon	Infant	1	NA	NA	F	D-F	Full	7	1	1	01:00	01:18	NA	0	18	NA	NA	right	head	0	R	R	R	0	1	Cissy	Mother	mot	1	0	NA
MAH01185	20131101	16:40	00:11:00	Cinnamon	Infant	1	NA	NA	F	D-F	Full	7	2	1	01:31	01:38	00:13	1	7	8	1.142857143	right	head	0	R	R	R	0	1	Cissy	Mother	mot	0	1	NA
MAH01185	20131101	16:40	00:11:00	Cinnamon	Infant	1	NA	NA	F	D-F	Full	7	3	1	01:48	01:53	00:10	1	5	9	1.8	left	body	1	R	R	R	0	1	Cissy	Mother	mot	1	1	NA
MAH01185	20131101	16:40	00:11:00	Cinnamon	Infant	1	NA	NA	F	D-F	Full	7	4	1	06:19	06:44	04:26	0	25	NA	NA	left	switch	1	R	R	R	0	1	Cissy	Mother	mot	0	0	NA
MAH01185	20131101	16:40	00:11:00	Cinnamon	Infant	1	NA	NA	F	D-F	Full	7	5	1	08:06	08:36	01:22	0	30	NA	NA	right	switch	1	R	R	R	0	1	Cissy	Mother	mot	1	1	NA
MAH01185	20131101	16:40	00:11:00	Cinnamon	Infant	1	NA	NA	F	D-F	Full	7	6	1	09:01	09:08	00:25	1	7	11	1.571428571	left	body	1	R	R	R	0	1	Cissy	Mother	mot	1	1	NA
MAH01185	20131101	16:40	00:11:00	Cinnamon	Infant	1	NA	NA	F	D-F	Full	7	7	1	09:19	09:24	00:11	1	5	7	1.4	right	body	1	R	R	R	0	1	Cissy	Mother	mot	1	1	NA
S1040004	20131101	07:00	00:01:22	Cissy	Mother	45	19	4	F	A-F	Full	1	1	0	00:00	00:03	NA	0	3	4	1.333333333	right	limbs	1	M	R	M	1	0	Cinnamon	Infant	off	NA	NA	NA
S1040004	20131101	07:00	00:01:22	Cinnamon	Infant	1	NA	NA	F	D-F	Full	1	1	0	01:07	01:13	NA	0	5	7	1.4	right	body	1	M	M	M	1	1	Cissy	Mother	mot	0	0	NA
S1040006	20131101	07:05	00:01:43	Cissy	Mother	45	19	4	F	A-F	Full	1	1	0	00:59	01:15	NA	0	16	22	1.375	right	body	1	M	R	M	1	1	Cinnamon	Infant	off	0	1	NA
S1040007	20131101	07:09	00:01:14	Cissy	Mother	45	19	4	F	A-F	Full	1	1	0	00:45	00:55	NA	0	10	10	1	right	body	1	M	R	M	1	1	Cinnamon	Infant	off	1	1	NA
S1040019	20131101	08:45	00:01:17	Cissy	Mother	45	19	4	F	A-F	Full	1	1	0	00:00	00:03	NA	0	3	6	2	right	head	0	G	G	G	0	1	Cinnamon	Infant	off	1	NA	NA
S1040024	20131101	09:13	00:06:38	Cissy	Mother	45	19	4	F	A-F	Full	1	1	0	02:53	02:56	NA	0	3	4	1.333333333	right	body	1	F	F	F	0	1	Cinnamon	Infant	off	1	0	NA
S1040005	20131101	07:01	00:02:12	Cissy	Mother	45	19	4	F	A-F	Full	2	1	1	00:51	01:07	NA	0	16	20	1.25	right	body	1	M	R	M	1	1	Cinnamon	Infant	off	1	1	NA
S1040005	20131101	07:01	00:02:12	Cissy	Mother	45	19	4	F	A-F	Full	2	2	1	01:35	01:39	00:28	1	4	5	1.25	left	body	1	M	R	R	0	1	Cinnamon	Infant	off	1	1	NA
S1040005	20131101	07:01	00:02:12	Cinnamon	Infant	1	NA	NA	F	D-F	Full	1	1	0	01:45	01:54	NA	0	9	NA	NA	left	body	1	R	R	B	0	1	Cissy	Mother	mot	1	0	NA
S1090002	20131105	10:33	00:01:01	Ellie	Adolescent	14	NA	NA	F	D-F	Partial	1	1	0	00:18	00:22	NA	0	4	6	1.5	right	limbs	1	R	R	R	0	0	NA	NA	NA	NA	NA	NA
S1090014	20131105	12:04	00:00:07	Ellie	Adolescent	14	NA	NA	F	D-F	Partial	1	1	0	00:00	00:02	NA	0	2	4	2	right	head	0	M	R	M	1	1	UnflNAMale	None	oth	NA	NA	NA
S1090030	20131105	14:23	00:00:26	Ellie	Adolescent	14	NA	NA	F	D-F	Partial	1	1	0	00:10	00:12	NA	0	2	3	1.5	right	head	0	F	F	F	0	1	UnflNAMale	None	oth	0	0	NA
S1090036	20131105	15:03	00:01:23	Ellie	Adolescent	14	NA	NA	F	D-F	Partial	1	1	0	00:45	00:46	NA	0	1	1	1	right	head	0	F	F	F	0	1	UnflNAMale	None	oth	1	0	NA
S1090058	20131105	17:33	00:01:50	Ellie	Adolescent	14	NA	NA	F	D-F	Partial	1	1	0	00:14	00:17	NA	0	3	5	1.666666667	left	body	1	G	G	G	0	1	UnflNAMale	None	oth	1	0	NA
00016B	20131120	14:18	00:01:12	Ellie	Adolescent	14	NA	NA	F	D-F	Partial	1	1	0	00:00	00:05	NA	0	5	9	1.8	right	head	0	F	F	F	0	0	NA	NA	NA	NA	NA	NA
00018B	20131120	14:57	00:00:43	Ellie	Adolescent	14	NA	NA	F	D-F	Partial	1	1	0	00:00	00:01	NA	0	1	2	2	left	body	1	F	F	F	0	0	NA	NA	NA	NA	NA	NA
S1180008	20131120	14:03	00:02:30	Ellie	Adolescent	14	NA	NA	F	D-F	Partial	1	1	0	00:55	00:57	NA	0	2	4	2	left	head	0	F	F	F	0	0	NA	NA	NA	NA	NA	NA
S1180009	20131120	14:44	00:01:00	Ellie	Adolescent	14	NA	NA	F	D-F	Partial	1	1	0	00:22	00:23	NA	0	1	2	2	left	head	0	F	F	F	0	0	NA	NA	NA	NA	NA	NA
S1180010	20131120	15:09	00:01:44	Ellie	Adolescent	14	NA	NA	F	D-F	Partial	1	1	0	00:00	00:01	NA	0	1	2	2	right	head	0	R	R	M	1	0	NA	NA	NA	NA	NA	NA
S1190003	20131121	06:23	00:00:59	Islo	Flanged	NA	NA	NA	M	A-M	Full	1	1	0	00:37	00:47	NA	0	10	13	1.3	right	limbs	1	R	R	R	0	0	NA	NA	NA	NA	NA	NA
S1190012	20131121	06:59	00:01:37	Ellie	Adolescent	14	NA	NA	F	D-F	Full	1	1	0	00:00	00:02	NA	0	2	3	1.5	left	head	1	M	R	M	1	0	NA	NA	NA	NA	NA	NA
S1190022	20131121	08:41	00:00:22	Ellie	Adolescent	14	NA	NA	F	D-F	Full	1	1	0	00:00	00:01	NA	0	1	1	1	right	body	1	M	R	M	1	0	NA	NA	NA	NA	NA	NA
S1190023	20131121	08:42	00:01:55	Ellie	Adolescent	14	NA	NA	F	D-F	Full	2	1	1	01:08	01:15	NA	0	7	8	1.142857143	right	switch	1	M	R	M	1	0	NA	NA	NA	NA	NA	NA
S1190023	20131121	08:42	00:01:55	Ellie	Adolescent	14	NA	NA	F	D-F	Full	2	2	1	01:23	01:28	00:08	1	5	5	1	left	body	1	M	R	M	1	0	NA	NA	NA	NA	NA	NA
S1190025	20131121	08:46	00:04:27	Ellie	Adolescent	14	NA	NA	F	D-F	Full	2	1	1	00:38	00:42	NA	0	4	5	1.25	right	limbs	1	R	R	R	0	0	NA	NA	NA	NA	NA	NA
S1190025	20131121	08:46	00:04:27	Ellie	Adolescent	14	NA	NA	F	D-F	Full	2	2	1	01:43	01:51	01:01	0	8	6	0.75	right	head	0	R	R	R	0	0	NA	NA	NA	NA	NA	NA
S1190057	20131121	15:06	00:00:46	Ellie	Adolescent	14	NA	NA	F	D-F	Full	1	1	0	00:00	00:02	NA	0	2	3	1.5	left	head	0	F	F	F	0	0	NA	NA	NA	NA	NA	NA
S1190031	20131121	10:26	00:01:34	Ellie	Adolescent	14	NA	NA	F	D-F	Full	2	1	1	00:00	00:01	NA	0	1	2	2	left	body	1	F	F	F	0	0	NA	NA	NA	NA	NA	NA
S1190031	20131121	10:26	00:01:34	Ellie	Adolescent	14	NA	NA	F	D-F	Full	2	2	1	00:19	00:23	00:18	1	4	5	1.25	right	NA	NA	F	F	F	0	0	NA	NA	NA	NA	NA	NA
S1190033	20131121	10:38	00:01:25	Ellie	Adolescent	14	NA	NA	F	D-F	Full	1	1	0	00:15	00:17	NA	0	2	3	1.5	right	head	0	F	F	F	0	0	NA	NA	NA	NA	NA	NA
S1190034	20131121	10:41	00:01:51	Ellie	Adolescent	14	NA	NA	F	D-F	Full	1	1	0	00:22	00:23	NA	0	1	2	2	left	head	0	F	F	F	0	0	NA	NA	NA	NA	NA	NA
S1190045	20131121	12:26	00:01:00	Ellie	Adolescent	14	NA	NA	F	D-F	Full	1	1	0	00:00	00:03	NA	0	3	4	1.333333333	left	head	0	F	F	F	0	0	NA	NA	NA	NA	NA	NA
S1190049	20131121	13:45	00:01:56	Ellie	Adolescent	14	NA	NA	F	D-F	Full	1	1	0	00:00	00:02	NA	0	2	3	1.5	left	body	1	F	F	F	0	0	NA	NA	NA	NA	NA	NA
S1190051	20131121	13:58	00:00:29	Ellie	Adolescent	14	NA	NA	F	D-F	Full	2	1	1	00:00	00:01	NA	0	1	2	2	right	head	0	M	R	M	1	0	NA	NA	NA	NA	NA	NA
S1190051	20131121	13:58	00:00:29	Ellie	Adolescent	14	NA	NA	F	D-F	Full	2	2	1	00:08	00:15	00:07	1	7	8	1.142857143	left	switch	1	M	R	M	1	0	NA	NA	NA	NA	NA	NA
388	20140124	06:57	00:00:47	Lilly	Adolescent	NA	NA	NA	F	D-F	Partial	2	1	1	00:07	00:20	NA	0	13	17	1.307692308	left	limbs	1	F	F	F	0	1	UnflNAMale	None	oth	0	NA	NA
388	20140124	06:57	00:00:47	Lilly	Adolescent	NA	NA	NA	F	D-F	Partial	2	2	1	00:34	00:39	00:14	1	5	5	1	left	limbs	1	F	F	F	0	1	UnflNAMale	None	oth	0	NA	NA
403	20140124	08:08	00:01:29	Lilly	Adolescent	NA	NA	NA	F	D-F	Partial	1	1	0	01:16	01:17	NA	0	1	2	2	left	head	0	P	P	M	1	1	FlNAMale	None	oth	0	0	NA
411	20140124	08:54	00:00:28	Lilly	Adolescent	NA	NA	NA	F	D-F	Partial	1	1	0	00:05	00:06	NA	0	1	2	2	right	head	0	M	R	M	1	1	FlNAMale	None	oth	0	0	NA
417	20140124	09:32	00:01:11	Ellie	Adolescent	14	NA	NA	F	D-F	Partial	1	1	0	00:02	00:03	NA	0	1	2	2	right	body	1	F	F	F	0	1	?	?	NA	0	NA	NA
418	20140124	09:40	00:03:36	Ellie	Adolescent	14	NA	NA	F	D-F	Partial	5	1	1	00:04	00:04	NA	0	0.5	1	2	right	limbs	1	R	R	R	0	1	FlNAMale	None	oth	1	1	NA
418	20140124	09:40	00:03:36	Ellie	Adolescent	14	NA	NA	F	D-F	Partial	5	2	1	00:21	00:21	NA	0	0.5	1	2	right	head	0	R	R	C	0	1	FlNAMale	None	oth	1	1	NA
418	20140124	09:40	00:03:36	Ellie	Adolescent	14	NA	NA	F	D-F	Partial	5	3	1	02:02	02:03	NA	0	1	2	2	right	body	1	C	C	C	0	1	FlNAMale	None	oth	1	1	NA
418	20140124	09:40	00:03:36	Ellie	Adolescent	14	NA	NA	F	D-F	Partial	5	4	1	02:26	02:27	00:23	1	1	2	2	left	limbs	1	C	R	R	0	1	FlNAMale,NALillie	None	oth	0	NA	NA
418	20140124	09:40	00:03:36	Ellie	Adolescent	14	NA	NA	F	D-F	Partial	5	5	1	03:07	03:11	00:40	0	4	5	1.25	right	limbs	1	R	R	C	0	1	FlNAMale,NALillie	None	oth	0	NA	NA
421	20140124	09:51	00:00:46	Lilly	Adolescent	NA	NA	NA	F	D-F	Partial	1	1	0	00:11	00:14	NA	0	3	3	1	right	body	1	E	E	E	0	0	NA	NA	NA	NA	NA	NA
422	20140124	10:09	00:00:40	Ellie	Adolescent	14	NA	NA	F	D-F	Partial	2	1	1	00:00	00:09	NA	0	9	NA	NA	right	body	1	M	R	M	1	0	NA	NA	NA	NA	NA	NA
422	20140124	10:09	00:00:40	Ellie	Adolescent	14	NA	NA	F	D-F	Partial	2	2	1	00:20	00:21	00:11	1	1	2	2	right	body	1	M	R	M	1	0	NA	NA	NA	NA	NA	NA
425	20140124	10:37	00:00:22	Lilly	Adolescent	NA	NA	NA	F	D-F	Partial	1	1	0	00:12	00:14	NA	0	2	3	1.5	left	limbs	1	R	M	M	1	1	Ellie	None	oth	0	0	NA
429	20140124	11:07	00:02:06	Lilly	Adolescent	NA	NA	NA	F	D-F	Partial	1	1	0	00:35	00:40	NA	0	5	3	0.6	left	body	1	R	R	Peer	0	1	FlNAmale,NAEllie	None	oth	0	0	NA
430	20140124	11:11	00:01:00	Ellie	Adolescent	14	NA	NA	F	D-F	Partial	1	1	0	00:37	00:42	NA	0	5	8	1.6	left	head	0	R	R	R	0	1	FlNAmale,NAEllie	None	oth	1	1	NA
430	20140124	11:11	00:01:00	Lilly	Adolescent	NA	NA	NA	F	D-F	Partial	1	1	0	00:38	00:44	NA	0	6	7	1.166666667	left	head	0	A	R	A	0	1	Ellie,NAFlNAmale	None	oth	1	0	NA
434	20140124	11:47	00:06:17	Ellie	Adolescent	14	NA	NA	F	D-F	Partial	1	1	0	06:01	06:11	NA	0	10	NA	NA	left	NA	NA	C	R	R	0	1	FlNAmale	None	oth	0	1	NA
435	20140124	12:27	00:02:14	Lilly	Adolescent	NA	NA	NA	F	D-F	Partial	1	2	0	00:54	00:58	NA	0	4	6	1.5	left	body	1	F	F	F	0	1	FlNAmale	None	oth	0	0	NA
435	20140124	12:27	00:02:14	Lilly	Adolescent	NA	NA	NA	F	D-F	Partial	2	2	1	01:21	01:26	NA	0	5	8	1.6	left	body	1	F	F	F	0	1	FlNAmale	None	oth	0	0	NA
444	20140124	13:25	00:02:50	Lilly	Adolescent	NA	NA	NA	F	D-F	Partial	1	1	0	02:37	02:41	NA	0	4	7	1.75	left	body	1	A	R	M	1	1	FlNAmale	None	oth	0	0	NA
455	20140124	15:58	00:06:03	Ellie	Adolescent	14	NA	NA	F	D-F	Partial	1	1	0	01:18	01:20	NA	0	2	3	1.5	left	limbs	1	R	R	R	0	1	FlNAmale,NALillie	None	oth	0	0	NA
455	20140124	15:58	00:06:03	Lilly	Adolescent	NA	NA	NA	F	D-F	Partial	2	1	1	02:12	02:15	NA	0	3	4	1.333333333	right	body	1	C	C	C	0	1	FlNAmale,NAEllie	None	oth	0	1	NA
455	20140124	15:58	00:06:03	Lilly	Adolescent	NA	NA	NA	F	D-F	Partial	2	2	1	02:42	02:48	00:27	1	6	6	1	right	body	1	C	C	C	0	1	FlNAmale,NAEllie	None	oth	0	1	NA
455	20140124	15:58	00:06:03	Ellie	Adolescent	14	NA	NA	F	D-F	Partial	1	1	0	04:18	04:26	NA	0	8	11	1.375	left	switch	1	R	R	R	0	1	Lillie	None	oth	1	0	NA
455	20140124	15:58	00:06:03	Lilly	Adolescent	NA	NA	NA	F	D-F	Partial	1	1	0	05:10	05:12	NA	0	2	5	2.5	right	limbs	1	Af	Af	Af	0	1	Ellie	None	oth	1	1	NA
457	20140124	16:07	00:00:56	Ellie	Adolescent	14	NA	NA	F	D-F	Partial	1	1	0	00:11	00:11	NA	0	0.5	1	2	right	body	1	F	R	M	1	0	NA	None	NA	NA	NA	NA
460	20140124	16:31	00:02:27	Lilly	Adolescent	NA	NA	NA	F	D-F	Partial	1	1	0	00:35	00:36	NA	0	1	2	2	right	head	0	F	F	F	0	1	FlNAmale,NAEllie	None	oth	0	0	NA
S1120005	20131111	15:22	00:01:16	Fredy	Juvenile	8	NA	NA	M	D-M	Partial	2	1	1	00:00	00:09	NA	0	9	11	1.222222222	right	switch	1	M	R	M	1	0	NA	None	NA	NA	NA	NA
S1120005	20131111	15:22	00:01:16	Fredy	Juvenile	8	NA	NA	M	D-M	Partial	2	2	1	00:31	00:41	00:22	1	10	12	1.2	left	head	1	A	A	A	0	0	NA	None	NA	NA	NA	NA
S1120005	20131111	15:22	00:01:16	Fredy	Juvenile	8	NA	NA	M	D-M	Partial	3	3	1	00:52	01:06	NA	0	14	16	1.142857143	right	switch	1	A	R	M	1	0	NA	None	NA	NA	NA	NA
S1120007	20131111	16:10	00:03:16	Fredy	Juvenile	8	NA	NA	M	D-M	Partial	3	1	1	00:00	00:08	NA	0	8	9	1.125	right	limbs	1	F	F	F	0	0	NA	None	NA	NA	NA	NA
S1120007	20131111	16:10	00:03:16	Fredy	Juvenile	8	NA	NA	M	D-M	Partial	3	2	1	01:37	01:39	01:29	0	2	3	1.5	left	body	1	F	F	F	0	0	NA	None	NA	NA	NA	NA
S1120007	20131111	16:10	00:03:16	Fredy	Juvenile	8	NA	NA	M	D-M	Partial	3	3	1	01:53	01:58	00:14	1	5	6	1.2	left	body	1	F	F	F	0	0	NA	None	NA	NA	NA	NA
S1120008	20131111	16:16	00:01:46	Fredy	Juvenile	8	NA	NA	M	D-M	Partial	1	1	0	01:43	01:46	NA	0	3	NA	NA	left	body	1	F	F	F	0	0	NA	None	NA	NA	NA	NA
S1130006	20131112	06:39	00:00:17	Fredy	Juvenile	8	NA	NA	M	D-M	Full-Partial	1	1	0	00:00	00:03	NA	0	3	4	1.333333333	right	body	1	M	R	M	1	0	NA	None	NA	NA	NA	NA
S1130009	20131112	06:55	00:00:47	Fredy	Juvenile	8	NA	NA	M	D-M	Full-Partial	1	1	0	00:00	00:01	NA	0	NA	5	NA	left	limbs	1	F	F	F	0	0	NA	None	NA	NA	NA	NA
S1130014	20131112	07:07	00:00:46	Fredy	Juvenile	8	NA	NA	M	D-M	Full-Partial	2	1	1	00:08	00:08	NA	0	0.5	1	2	right	body	1	M	M	M	1	0	NA	None	NA	NA	NA	NA
S1130014	20131112	07:07	00:00:46	Fredy	Juvenile	8	NA	NA	M	D-M	Full-Partial	2	2	1	00:21	00:30	00:13	1	9	12	1.333333333	right	limbs	1	M	R	F	0	0	NA	None	NA	NA	NA	NA
S1130016	20131112	07:19	00:01:12	Fredy	Juvenile	8	NA	NA	M	D-M	Full-Partial	1	1	0	00:00	00:04	NA	0	4	6	1.5	right	limbs	1	F	F	F	0	0	NA	None	NA	NA	NA	NA
S1130024	20131112	07:55	00:00:47	Frankie	Infant	1	NA	NA	M	D-M	Full-Partial	1	1	0	00:01	00:04	NA	0	3	4	1.333333333	right	limbs	1	R	R	R	0	1	Friska	Mother	mot	1	0	NA
S1130027	20131112	08:01	00:00:33	Fredy	Juvenile	8	NA	NA	M	D-M	Full-Partial	1	1	0	NA	NA	NA	NA	NA	3	NA	left	limbs	1	F	F	F	0	1	Friska+Frankie	Mother	mot	1	0	NA
S1130028	20131112	08:02	00:00:17	Fredy	Juvenile	8	NA	NA	M	D-M	Full-Partial	1	1	0	NA	NA	NA	NA	1.5	2	1.333333333	left	limbs	1	F	F	F	0	1	Friska+Frankie	Mother	mot	0	0	NA
S1130030	20131112	08:08	00:03:01	Friska	Mother	60	15	6	F	A-F	Full-Partial	6	1	1	00:00	00:04	NA	0	4	5	1.25	right	body	1	F	F	F	0	1	Frankie	Infant	off	1	0	NA
S1130030	20131112	08:08	00:03:01	Friska	Mother	60	15	6	F	A-F	Full-Partial	6	2	1	00:17	00:20	00:13	1	3	4	1.333333333	right	limbs	1	F	F	F	0	1	Frankie	Infant	off	1	0	NA
S1130030	20131112	08:08	00:03:01	Friska	Mother	60	15	6	F	A-F	Full-Partial	6	3	1	00:25	00:43	00:05	1	18	15	0.833333333	right	body	1	F	F	F	0	1	Frankie	Infant	off	1	0	NA
S1130030	20131112	08:08	00:03:01	Friska	Mother	60	15	6	F	A-F	Full-Partial	6	4	1	01:01	01:03	00:18	1	2	3	1.5	right	limbs	1	F	F	F	0	1	Frankie	Infant	off	1	0	NA
S1130030	20131112	08:08	00:03:01	Friska	Mother	60	15	6	F	A-F	Full-Partial	6	5	1	01:15	01:23	00:12	1	8	10	1.25	right	body	1	F	F	F	0	1	Frankie	Infant	off	1	1	NA
S1130030	20131112	08:08	00:03:01	Friska	Mother	60	15	6	F	A-F	Full-Partial	6	6	1	01:56	01:59	00:33	0	3	4	1.333333333	right	body	1	F	F	F	0	0	Frankie	Infant	off	NA	NA	NA
S1130030	20131112	08:08	00:03:01	Frankie	Infant	1	NA	NA	M	D-M	Full-Partial	2	1	1	00:00	00:11	NA	0	13	NA	NA	both	switch	1	F	F	F	0	1	Friska	Mother	mot	1	0	NA
S1130030	20131112	08:08	00:03:01	Frankie	Infant	1	NA	NA	M	D-M	Full-Partial	2	2	1	00:37	01:22	NA	0	45	NA	NA	both	head	0	F	R	R	0	1	Friska	Mother	mot	1	0	NA
S1130031	20131112	08:13	00:03:40	Fredy	Juvenile	8	NA	NA	M	D-M	Full-Partial	1	1	0	02:00	02:07	NA	0	7	7	1	left	limbs	1	F	F	F	0	1	Friska+Frankie	Mother	mot	0	0	NA
S1130031	20131112	08:13	00:03:40	Friska	Mother	60	15	6	F	A-F	Full-Partial	1	1	0	03:06	03:10	NA	0	4	5	1.25	left	head	0	F	F	F	0	0	FrankieNA+NAfredie	Infant	off	NA	NA	NA
S1130032	20131112	08:17	00:02:17	Fredy	Juvenile	8	NA	NA	M	D-M	Full-Partial	2	1	1	00:04	00:10	NA	0	6	9	1.5	left	limbs	1	F	F	F	0	1	Friska+Frankie	Mother	mot	0	0	NA
S1130032	20131112	08:17	00:02:17	Fredy	Juvenile	8	NA	NA	M	D-M	Full-Partial	2	2	1	01:04	01:10	00:54	0	6	4	0.666666667	left	switch	1	F	F	F	0	1	Friska+Frankie	Mother	mot	0	0	NA
S1130033	20131112	08:22	00:01:33	Frankie	Infant	1	NA	NA	M	D-M	Full-Partial	1	1	0	00:00	00:10	NA	0	10	12	1.2	right	head	0	R	R	R	0	0	Friska	Mother	mot	NA	NA	NA
S1130033	20131112	08:22	00:01:33	Friska	Mother	60	15	6	F	A-F	Full-Partial	1	1	0	00:31	00:35	NA	0	4	4	1	right	limbs	1	F	R	F	0	0	FrankieNA+NAfredie	Infant	off	NA	NA	NA
S1130033	20131112	08:22	00:01:33	Fredy	Juvenile	8	NA	NA	M	D-M	Full-Partial	1	1	0	00:50	00:56	NA	0	6	10	1.666666667	right	body	1	F	F	F	0	1	Friska+Frankie	Mother	mot	0	0	NA
S1130034	20131112	08:23	00:01:53	Fredy	Juvenile	8	NA	NA	M	D-M	Full-Partial	2	1	1	00:42	00:48	NA	0	6	7	1.166666667	right	limbs	1	F	F	F	0	1	Friska+Frankie	Mother	mot	0	0	NA
S1130034	20131112	08:23	00:01:53	Fredy	Juvenile	8	NA	NA	M	D-M	Full-Partial	2	2	1	01:20	01:26	00:32	0	6	6	1	right	switch	1	F	F	F	0	1	Friska+Frankie	Mother	mot	0	0	NA
S1130035	20131112	08:25	00:01:10	Friska	Mother	60	15	6	F	A-F	Full-Partial	1	1	0	00:00	00:05	NA	0	5	7	1.4	left	head	0	F	F	F	0	1	FrankieNA+NAfredie	Infant	off	0	0	NA
S1130037	20131112	08:36	00:01:17	Fredy	Juvenile	8	NA	NA	M	D-M	Full-Partial	1	1	0	00:03	00:10	NA	0	7	9	1.285714286	left	limbs	1	M	R	F	0	1	Friska+Frankie	Mother	mot	1	0	NA
S1130037	20131112	08:36	00:01:17	Friska	Mother	60	15	6	F	A-F	Full-Partial	1	1	0	00:24	00:28	NA	0	4	5	1.25	right	limbs	1	F	F	F	0	1	FrankieNA+NAfredie	Infant	off	1	0	NA
S1130038	20131112	08:40	00:00:53	Frankie	Infant	1	NA	NA	M	D-M	Full-Partial	1	1	0	00:14	00:17	NA	0	3	4	1.333333333	left	head	0	F	F	F	0	1	Friska	Mother	mot	0	0	NA
S1130038	20131112	08:40	00:00:53	Fredy	Juvenile	8	NA	NA	M	D-M	Full-Partial	1	1	0	00:41	00:42	NA	0	1	1	1	left	limbs	1	M	M	M	1	1	Friska+Frankie	Mother	mot	0	0	NA
S1130039	20131112	08:42	00:01:11	Fredy	Juvenile	8	NA	NA	M	D-M	Full-Partial	1	1	0	00:22	00:23	NA	0	1	2	2	right	limbs	1	F	F	F	0	1	Friska+Frankie	Mother	mot	0	0	NA
S1130043	20131112	09:50	00:00:33	Fredy	Juvenile	8	NA	NA	M	D-M	Full-Partial	1	1	0	NA	00:04	NA	0	NA	6	NA	left	body	1	F	F	F	0	0	NA	None	NA	NA	NA	NA
S1130044	20131112	10:04	00:00:21	Fredy	Juvenile	8	NA	NA	M	D-M	Full-Partial	1	1	0	NA	00:01	NA	0	NA	3	NA	right	head	0	F	F	M	1	0	NA	None	NA	NA	NA	NA
S1130045	20131112	10:12	00:00:13	Fredy	Juvenile	8	NA	NA	M	D-M	Full-Partial	1	1	0	NA	00:02	NA	0	NA	3	NA	left	head	0	M	R	M	1	0	NA	None	NA	NA	NA	NA
S1130047	20131112	10:19	00:00:17	Fredy	Juvenile	8	NA	NA	M	D-M	Full-Partial	1	1	0	NA	00:02	NA	0	NA	5	NA	left	head	0	F	F	M	1	0	NA	None	NA	NA	NA	NA
S1130048	20131112	10:31	00:00:23	Fredy	Juvenile	8	NA	NA	M	D-M	Full-Partial	1	1	0	NA	NA	NA	NA	NA	3	NA	right	head	0	F	M	M	1	0	NA	None	NA	NA	NA	NA
S1130053	20131112	10:50	00:01:00	Friska	Mother	60	15	6	F	A-F	Full-Partial	1	1	0	00:12	00:19	NA	0	7	9	1.285714286	left	limbs	1	M	R	M	1	1	FrankieNA	Infant	off	1	0	NA
S1130054	20131112	11:04	00:00:24	Fredy	Juvenile	8	NA	NA	M	D-M	Full-Partial	1	1	0	00:02	00:03	NA	0	1	2	2	right	body	1	F	F	F	0	0	NA	None	NA	NA	NA	NA
S1130055	20131112	11:15	00:01:01	Fredy	Juvenile	8	NA	NA	M	D-M	Full-Partial	2	1	1	NA	NA	NA	NA	NA	3	NA	left	head	0	F	F	F	0	0	NA	None	NA	NA	NA	NA
S1130055	20131112	11:15	00:01:01	Fredy	Juvenile	8	NA	NA	M	D-M	Full-Partial	2	2	1	00:16	00:18	NA	0	2	3	1.5	left	limbs	1	F	F	F	0	0	NA	None	NA	NA	NA	NA
S1130057	20131112	11:32	00:00:41	Fredy	Juvenile	8	NA	NA	M	D-M	Full-Partial	1	1	0	NA	00:01	NA	0	NA	5	NA	left	head	0	M	R	M	1	0	NA	None	NA	NA	NA	NA
S1130058	20131112	11:37	00:00:48	Fredy	Juvenile	8	NA	NA	M	D-M	Full-Partial	1	1	0	00:02	00:05	NA	0	3	4	1.333333333	left	head	0	F	F	F	0	0	NA	None	NA	NA	NA	NA
S1130059	20131112	11:39	00:00:38	Fredy	Juvenile	8	NA	NA	M	D-M	Full-Partial	1	1	0	00:03	00:11	NA	0	8	9	1.125	left	switch	1	F	F	M	1	0	NA	None	NA	NA	NA	NA
S1130064	20131112	12:38	00:02:36	Fredy	Juvenile	8	NA	NA	M	D-M	Full-Partial	2	1	1	01:45	01:46	NA	0	2	1	0.5	left	limbs	1	F	F	F	0	1	Friska+Frankie	Mother	mot	0	0	NA
S1130064	20131112	12:38	00:02:36	Fredy	Juvenile	8	NA	NA	M	D-M	Full-Partial	2	2	1	01:55	01:58	00:09	1	3	3	1	right	body	1	F	F	F	0	1	Friska+Frankie	Mother	mot	0	0	NA
S1130065	20131112	12:41	00:00:46	Fredy	Juvenile	8	NA	NA	M	D-M	Full-Partial	1	1	0	00:03	00:04	NA	0	1	2	2	right	body	1	F	F	F	0	1	Friska+Frankie	Mother	mot	0	0	NA
S1130069	20131112	12:49	00:01:43	Frankie	Infant	1	NA	NA	M	D-M	Full-Partial	1	1	0	00:10	00:11	NA	0	1	2	2	right	head	0	TF	TF	TF	0	1	Friska	Mother	mot	0	0	NA
MAH01205	20131113	13:06	00:00:46	Xenix	Unflanged	NA	NA	NA	M	A-M	Partial	1	1	0	00:00	00:05	NA	0	5	7	1.4	right	limbs	1	F	F	F	0	0	NA	NA	NA	NA	NA	NA
MAH01208	20131113	13:12	00:02:30	Xenix	Unflanged	NA	NA	NA	M	A-M	Partial	3	1	1	00:08	00:09	NA	0	1	2	2	left	body	1	F	F	F	0	0	NA	NA	NA	NA	NA	NA
MAH01208	20131113	13:12	00:02:30	Xenix	Unflanged	NA	NA	NA	M	A-M	Partial	3	2	1	01:03	01:05	00:54	0	2	3	1.5	left	limbs	1	F	F	F	0	0	NA	NA	NA	NA	NA	NA
MAH01208	20131113	13:12	00:02:30	Xenix	Unflanged	NA	NA	NA	M	A-M	Partial	3	3	1	01:48	01:55	00:43	0	7	7	1	left	switch	1	F	F	F	0	0	NA	NA	NA	NA	NA	NA
MAH01209	20131113	13:16	00:02:41	Xenix	Unflanged	NA	NA	NA	M	A-M	Partial	5	1	1	00:25	00:27	NA	0	2	3	1.5	right	body	1	F	F	F	0	0	NA	NA	NA	NA	NA	NA
MAH01209	20131113	13:16	00:02:41	Xenix	Unflanged	NA	NA	NA	M	A-M	Partial	5	2	1	00:49	00:54	00:22	1	5	6	1.2	left	limbs	1	F	F	F	0	0	NA	NA	NA	NA	NA	NA
MAH01209	20131113	13:16	00:02:41	Xenix	Unflanged	NA	NA	NA	M	A-M	Partial	5	3	1	01:18	01:18	00:24	1	0.5	1	2	left	body	1	F	F	F	0	0	NA	NA	NA	NA	NA	NA
MAH01209	20131113	13:16	00:02:41	Xenix	Unflanged	NA	NA	NA	M	A-M	Partial	5	4	1	01:45	01:47	00:27	1	2	4	2	left	limbs	1	F	F	F	0	0	NA	NA	NA	NA	NA	NA
MAH01209	20131113	13:16	00:02:41	Xenix	Unflanged	NA	NA	NA	M	A-M	Partial	5	5	1	02:01	02:01	00:14	1	0.5	1	2	right	head	0	F	F	F	0	0	NA	NA	NA	NA	NA	NA
MAH01212	20131113	13:19	00:00:41	Xenix	Unflanged	NA	NA	NA	M	A-M	Partial	2	1	1	00:00	00:04	NA	0	4	5	1.25	left	body	1	F	F	F	0	0	NA	NA	NA	NA	NA	NA
MAH01212	20131113	13:19	00:00:41	Xenix	Unflanged	NA	NA	NA	M	A-M	Partial	2	2	1	00:33	00:33	00:29	1	0.5	1	2	left	limbs	1	F	F	F	0	0	NA	NA	NA	NA	NA	NA
MAH01213	20131113	13:30	00:00:52	Xenix	Unflanged	NA	NA	NA	M	A-M	Partial	1	1	0	00:03	00:07	NA	0	4	4	1	left	body	1	F	F	M	1	0	NA	NA	NA	NA	NA	NA
MAH01217	20131113	13:38	00:00:45	Xenix	Unflanged	NA	NA	NA	M	A-M	Partial	1	1	0	NA	00:01	NA	0	NA	4	NA	right	limbs	1	F	F	F	0	0	NA	NA	NA	NA	NA	NA
MAH01218	20131113	13:43	00:04:04	Xenix	Unflanged	NA	NA	NA	M	A-M	Partial	5	1	1	00:19	00:22	NA	0	3	5	1.666666667	right	head	0	F	F	F	0	0	NA	NA	NA	NA	NA	NA
MAH01218	20131113	13:43	00:04:04	Xenix	Unflanged	NA	NA	NA	M	A-M	Partial	5	2	1	00:26	00:27	00:04	1	1	3	3	right	head	0	F	F	F	0	0	NA	NA	NA	NA	NA	NA
MAH01218	20131113	13:43	00:04:04	Xenix	Unflanged	NA	NA	NA	M	A-M	Partial	5	3	1	00:32	00:33	00:05	1	1	2	2	right	head	0	F	F	F	0	0	NA	NA	NA	NA	NA	NA
MAH01218	20131113	13:43	00:04:04	Xenix	Unflanged	NA	NA	NA	M	A-M	Partial	5	4	1	00:41	00:43	00:08	1	2	3	1.5	right	head	0	F	F	F	0	0	NA	NA	NA	NA	NA	NA
MAH01218	20131113	13:43	00:04:04	Xenix	Unflanged	NA	NA	NA	M	A-M	Partial	5	5	1	02:33	02:36	01:50	0	3	4	1.333333333	right	switch	1	F	F	F	0	0	NA	NA	NA	NA	NA	NA
1050	20140211	06:38	00:01:07	Fredy	Juvenile	8	NA	NA	M	D-M	Full	2	1	1	00:13	00:22	NA	0	9	7	0.777777778	left	limbs	1	R	R	R	0	0	NA	NA	NA	NA	NA	NA
1050	20140211	06:38	00:01:07	Fredy	Juvenile	8	NA	NA	M	D-M	Full	2	2	1	00:29	00:31	00:00	0	2	3	1.5	left	body	1	R	R	M	1	0	NA	NA	NA	NA	NA	NA
1052	20140211	07:11	00:00:53	Fredy	Juvenile	8	NA	NA	M	D-M	Full	3	1	1	NA	00:01	NA	0	NA	10	NA	left	body	1	M	R	M	1	0	NA	NA	NA	NA	NA	NA
1052	20140211	07:11	00:00:53	Fredy	Juvenile	8	NA	NA	M	D-M	Full	3	2	1	00:05	00:12	00:04	1	7	7	1	left	head	0	M	R	R	0	0	NA	NA	NA	NA	NA	NA
1052	20140211	07:11	00:00:53	Fredy	Juvenile	8	NA	NA	M	D-M	Full	3	3	1	00:28	00:40	00:16	1	12	15	1.25	left	body	1	M	R	M	1	0	NA	NA	NA	NA	NA	NA
1053	20140211	07:16	00:02:35	Fredy	Juvenile	8	NA	NA	M	D-M	Full	2	1	1	00:52	01:15	NA	0	22	27	1.227272727	right	body	1	F	R	R	0	0	NA	NA	NA	NA	NA	NA
1053	20140211	07:16	00:02:35	Fredy	Juvenile	8	NA	NA	M	D-M	Full	2	2	1	01:25	01:26	00:10	1	1	1	1	right	limbs	1	R	R	F	0	0	NA	NA	NA	NA	NA	NA
1054	20140211	07:42	00:01:15	Fredy	Juvenile	8	NA	NA	M	D-M	Full	1	1	0	00:00	00:07	NA	0	7	8	1.142857143	left	NA	NA	F	F	F	0	0	NA	NA	NA	NA	NA	NA
1056	20140211	08:00	00:01:29	Fredy	Juvenile	8	NA	NA	M	D-M	Full	2	1	1	00:00	00:08	NA	0	8	13	1.625	right	limbs	1	F	R	F	0	0	NA	NA	NA	NA	NA	NA
1056	20140211	08:00	00:01:29	Fredy	Juvenile	8	NA	NA	M	D-M	Full	2	2	1	00:12	00:26	00:04	1	14	18	1.285714286	left	head	0	F	F	F	0	0	NA	NA	NA	NA	NA	NA
1057	20140211	08:15	00:00:18	Fredy	Juvenile	8	NA	NA	M	D-M	Full	1	1	0	NA	00:01	NA	0	NA	1	NA	left	limbs	1	M	R	M	1	0	NA	NA	NA	NA	NA	NA
1058	20140211	08:21	00:00:31	Fredy	Juvenile	8	NA	NA	M	D-M	Full	1	1	0	NA	00:08	NA	0	NA	13	NA	right	head	0	M	R	M	1	0	NA	NA	NA	NA	NA	NA
1060	20140211	08:27	00:00:29	Fredy	Juvenile	8	NA	NA	M	D-M	Full	1	1	0	NA	00:07	NA	0	NA	9	NA	right	switch	1	M	R	M	1	0	NA	NA	NA	NA	NA	NA
1061	20140211	08:29	00:00:40	Fredy	Juvenile	8	NA	NA	M	D-M	Full	1	1	0	NA	00:02	NA	0	NA	11	NA	left	limbs	1	M	R	M	1	0	NA	NA	NA	NA	NA	NA
1063	20140211	08:47	00:00:26	Fredy	Juvenile	8	NA	NA	M	D-M	Full	1	1	0	NA	NA	NA	NA	3	5	1.666666667	left	limbs	1	M	R	M	1	0	NA	NA	NA	NA	NA	NA
1064	20140211	08:48	00:00:26	Fredy	Juvenile	8	NA	NA	M	D-M	Full	1	1	0	NA	NA	NA	NA	3	5	1.666666667	left	limbs	1	M	R	M	1	0	NA	NA	NA	NA	NA	NA
1065	20140211	08:49	00:00:31	Fredy	Juvenile	8	NA	NA	M	D-M	Full	1	1	0	NA	00:07	NA	0	NA	9	NA	left	body	1	M	R	M	1	0	NA	NA	NA	NA	NA	NA
1071	20140211	09:25	00:00:39	Fredy	Juvenile	8	NA	NA	M	D-M	Full	1	1	0	NA	00:03	NA	0	NA	9	NA	right	body	1	Tantrum	R	M	1	0	NA	NA	NA	NA	NA	NA
1075	20140211	09:50	00:00:37	Fredy	Juvenile	8	NA	NA	M	D-M	Full	1	1	0	NA	NA	NA	NA	NA	4	NA	right	limbs	1	R	R	M	1	0	NA	NA	NA	NA	NA	NA
1076	20140211	09:52	00:00:41	Fredy	Juvenile	8	NA	NA	M	D-M	Full	1	1	0	00:02	00:09	NA	0	7	9	1.285714286	right	limbs	1	R	R	M	1	0	NA	NA	NA	NA	NA	NA
1077	20140211	09:57	00:02:24	Fredy	Juvenile	8	NA	NA	M	D-M	Full	3	1	1	NA	NA	NA	NA	NA	8	NA	right	body	1	R	R	M	1	0	NA	NA	NA	NA	NA	NA
1077	20140211	09:57	00:02:24	Fredy	Juvenile	8	NA	NA	M	D-M	Full	3	2	1	00:29	00:30	NA	0	2	1	0.5	right	body	1	M	R	M	1	0	NA	NA	NA	NA	NA	NA
1077	20140211	09:57	00:02:24	Fredy	Juvenile	8	NA	NA	M	D-M	Full	3	3	1	01:23	01:28	00:53	0	5	7	1.4	right	body	1	F	R	F	0	0	NA	NA	NA	NA	NA	NA
1083	20140211	10:45	00:00:49	Fredy	Juvenile	8	NA	NA	M	D-M	Full	2	1	1	NA	00:02	NA	0	NA	9	NA	left	head	0	M	R	M	1	0	NA	NA	NA	NA	NA	NA
1083	20140211	10:45	00:00:49	Fredy	Juvenile	8	NA	NA	M	D-M	Full	2	2	1	00:31	00:41	00:29	1	10	11	1.1	right	limbs	1	M	R	M	1	0	NA	NA	NA	NA	NA	NA
1083	20140211	10:45	00:00:49	Fredy	Juvenile	8	NA	NA	M	D-M	Full	2	1	1	NA	00:05	NA	0	NA	7	NA	left	head	0	M	R	M	1	0	NA	NA	NA	NA	NA	NA
1084	20140211	10:48	00:02:10	Fredy	Juvenile	8	NA	NA	M	D-M	Full	2	1	1	00:58	01:06	00:53	0	8	11	1.375	left	body	1	M	R	R	0	0	NA	NA	NA	NA	NA	NA
1084	20140211	10:48	00:02:10	Fredy	Juvenile	8	NA	NA	M	D-M	Full	2	2	1	01:42	01:48	00:36	0	6	8	1.333333333	left	limbs	1	R	R	M	1	0	NA	NA	NA	NA	NA	NA
1086	20140211	10:56	00:05:39	Fredy	Juvenile	8	NA	NA	M	D-M	Full	2	1	1	02:57	03:04	NA	0	8	11	1.375	right	body	1	W	W	W	1	0	NA	NA	NA	NA	NA	NA
1086	20140211	10:56	00:05:39	Fredy	Juvenile	8	NA	NA	M	D-M	Full	2	2	1	05:11	05:17	02:07	0	6	8	1.333333333	left	limbs	1	W	W	F	0	0	NA	NA	NA	NA	NA	NA
1087	20140211	11:05	00:09:32	Fredy	Juvenile	8	NA	NA	M	D-M	Full	1	1	0	09:05	09:08	NA	0	3	NA	NA	right	body	1	R	R	F	0	0	NA	NA	NA	NA	NA	NA
1088	20140211	11:21	00:04:08	Fredy	Juvenile	8	NA	NA	M	D-M	Full	4	1	1	00:00	00:07	NA	0	NA	9	NA	left	body	1	M	R	M	1	0	NA	NA	NA	NA	NA	NA
1088	20140211	11:21	00:04:08	Fredy	Juvenile	8	NA	NA	M	D-M	Full	4	2	1	01:24	01:32	01:17	0	8	10	1.25	right	switch	1	M	R	R	0	0	NA	NA	NA	NA	NA	NA
1088	20140211	11:21	00:04:08	Fredy	Juvenile	8	NA	NA	M	D-M	Full	4	3	1	02:22	02:29	00:50	0	7	8	1.142857143	left	switch	1	M	R	M	1	0	NA	NA	NA	NA	NA	NA
1088	20140211	11:21	00:04:08	Fredy	Juvenile	8	NA	NA	M	D-M	Full	4	4	1	02:57	03:04	00:28	1	7	8	1.142857143	right	switch	1	M	R	M	1	1	FlNAmale	none	oth	1	0	NA
1090	20140211	11:40	00:01:00	Fredy	Juvenile	8	NA	NA	M	D-M	Full	1	1	0	00:00	00:07	NA	0	7	11	1.571428571	right	limbs	1	R	R	R	0	0	NA	NA	NA	NA	NA	NA
1091	20140211	11:45	00:00:38	Fredy	Juvenile	8	NA	NA	M	D-M	Full	1	1	0	NA	NA	NA	NA	NA	5	NA	right	head	0	R	R	M	1	0	NA	NA	NA	NA	NA	NA
1092	20140211	11:49	00:00:28	Fredy	Juvenile	8	NA	NA	M	D-M	Full	1	1	0	NA	NA	NA	NA	NA	5	NA	left	body	1	R	R	M	1	0	NA	NA	NA	NA	NA	NA
1094	20140211	12:23	00:00:50	Fredy	Juvenile	8	NA	NA	M	D-M	Full	1	1	0	NA	00:01	NA	0	NA	6	NA	left	head	0	F	F	F	0	0	NA	NA	NA	NA	NA	NA
1096	20140211	13:14	00:01:39	Fredy	Juvenile	8	NA	NA	M	D-M	Full	3	1	1	NA	NA	NA	NA	NA	5	NA	right	body	1	R	R	M	1	0	NA	NA	NA	NA	NA	NA
1096	20140211	13:14	00:01:39	Fredy	Juvenile	8	NA	NA	M	D-M	Full	3	2	1	00:46	00:58	NA	0	12	14	1.166666667	left	body	1	R	R	M	1	0	NA	NA	NA	NA	NA	NA
1096	20140211	13:14	00:01:39	Fredy	Juvenile	8	NA	NA	M	D-M	Full	3	2	1	01:06	01:13	00:08	1	7	12	1.714285714	right	limbs	1	M	R	M	1	0	NA	NA	NA	NA	NA	NA
1097	20140211	14:03	00:01:00	Fredy	Juvenile	8	NA	NA	M	D-M	Full	1	1	0	NA	00:02	NA	0	NA	6	NA	right	limbs	1	F	F	F	0	0	NA	NA	NA	NA	NA	NA
1098	20140211	14:09	00:00:31	Fredy	Juvenile	8	NA	NA	M	D-M	Full	1	1	0	NA	NA	NA	NA	NA	4	NA	right	head	0	M	M	M	1	0	NA	NA	NA	NA	NA	NA
1100	20140211	14:34	00:00:19	Fredy	Juvenile	8	NA	NA	M	D-M	Full	1	1	0	NA	NA	NA	NA	NA	3	NA	left	head	0	M	R	M	1	0	NA	NA	NA	NA	NA	NA
1101	20140211	14:37	00:00:29	Fredy	Juvenile	8	NA	NA	M	D-M	Full	1	1	0	NA	NA	NA	NA	NA	12	NA	left	body	1	M	R	M	1	0	NA	NA	NA	NA	NA	NA
1102	20140211	14:48	00:01:00	Fredy	Juvenile	8	NA	NA	M	D-M	Full	1	1	0	NA	NA	NA	NA	NA	7	NA	right	limbs	1	M	R	M	1	0	NA	NA	NA	NA	NA	NA
1104	20140211	15:22	00:00:45	Fredy	Juvenile	8	NA	NA	M	D-M	Full	2	1	1	NA	NA	00:06	NA	NA	4	NA	right	body	1	?	R	R	0	0	NA	NA	NA	NA	NA	NA
1104	20140211	15:22	00:00:45	Fredy	Juvenile	8	NA	NA	M	D-M	Full	2	2	1	00:04	00:16	NA	0	12	16	1.333333333	right	body	1	R	R	M	1	0	NA	NA	NA	NA	NA	NA
1107	20140211	15:26	00:00:34	Fredy	Juvenile	8	NA	NA	M	D-M	Full	1	1	0	NA	NA	NA	NA	15	13	0.866666667	NA	NA	NA	M	R	M	1	0	NA	NA	NA	NA	NA	NA
1110	20140211	15:57	00:00:24	Fredy	Juvenile	8	NA	NA	M	D-M	Full	1	1	0	NA	NA	NA	NA	NA	2	NA	left	body	1	R	M	M	1	0	NA	NA	NA	NA	NA	NA
1116	20140211	16:54	00:00:22	Fredy	Juvenile	8	NA	NA	M	D-M	Full	1	1	0	NA	00:05	NA	0	NA	10	NA	left	limbs	1	R	R	M	1	0	NA	NA	NA	NA	NA	NA
1117	20140211	16:57	00:00:37	Fredy	Juvenile	8	NA	NA	M	D-M	Full	1	1	0	NA	00:06	NA	0	NA	10	NA	right	head	0	R	R	R	0	1	FlNAmale	none	oth	1	0	NA
S1150008	20131116	13:02	00:00:45	Diddy	Juvenile	7	NA	NA	M	D-M	Partial	1	1	0	00:08	00:17	NA	0	9	14	1.555555556	left	body	1	R	R	M	1	0	NA	NA	NA	NA	NA	NA
S1150023	20131116	14:03	00:05:20	Diddy	Juvenile	7	NA	NA	M	D-M	Partial	1	1	0	00:02	00:08	NA	0	6	6	1	left	limbs	1	F	F	F	0	1	NA	NA	NA	NA	NA	NA
S1150027	20131116	14:36	00:01:01	Diddy	Juvenile	7	NA	NA	M	D-M	Partial	1	1	0	NA	NA	NA	NA	5	NA	NA	left	body	1	R	R	F	0	1	NA	NA	NA	NA	NA	NA
S1150028	20131116	15:40	00:00:13	Diddy	Juvenile	7	NA	NA	M	D-M	Partial	1	1	0	NA	NA	NA	NA	NA	9	NA	left	head	0	M	R	M	1	1	NA	NA	NA	NA	NA	NA
S1150029	20131116	16:00	00:02:20	Diddy	Juvenile	7	NA	NA	M	D-M	Partial	3	1	1	00:21	00:30	NA	0	9	NA	NA	right	head	0	F	F	F	0	1	NA	NA	NA	NA	NA	NA
S1150029	20131116	16:00	00:02:20	Diddy	Juvenile	7	NA	NA	M	D-M	Partial	3	2	1	00:47	00:58	00:17	1	11	15	1.363636364	left	body	1	F	F	F	0	1	NA	NA	NA	NA	NA	NA
S1150029	20131116	16:00	00:02:20	Diddy	Juvenile	7	NA	NA	M	D-M	Partial	3	3	1	01:14	01:21	00:16	1	7	13	1.857142857	left	limbs	1	F	F	F	0	1	NA	NA	NA	NA	NA	NA
S1150031	20131116	16:24	00:00:54	Diddy	Juvenile	7	NA	NA	M	D-M	Partial	1	1	0	00:02	00:04	NA	0	2	3	1.5	right	head	0	F	F	F	0	1	Ellie	none	oth	NA	NA	NA
S1150038	20131116	17:18	00:01:17	Diddy	Juvenile	7	NA	NA	M	D-M	Partial	1	1	0	00:40	00:50	NA	0	10	17	1.7	left	limbs	1	M	R	M	1	0	NA	NA	NA	NA	NA	NA
MAH01225	20131117	15:55	00:00:40	Diddy	Juvenile	7	NA	NA	M	D-M	Full	1	1	0	NA	NA	NA	NA	3	4	1.333333333	right	body	1	F	F	F	0	0	NA	NA	NA	NA	NA	NA
MAH01226	20131117	15:59	00:00:37	Diddy	Juvenile	7	NA	NA	M	D-M	Full	1	1	0	NA	00:03	NA	0	NA	7	NA	right	head	0	F	F	F	0	0	NA	NA	NA	NA	NA	NA
MAH01227	20131117	16:09	00:00:40	Diddy	Juvenile	7	NA	NA	M	D-M	Full	1	1	0	00:01	00:04	NA	0	3	3	1	right	head	0	F	F	F	0	0	NA	NA	NA	NA	NA	NA
MAH01228	20131117	16:10	00:00:33	Diddy	Juvenile	7	NA	NA	M	D-M	Full	1	1	0	00:00	00:07	NA	0	7	10	1.428571429	right	body	1	F	F	F	0	0	NA	NA	NA	NA	NA	NA
MAH01229	20131117	16:15	00:00:26	Diddy	Juvenile	7	NA	NA	M	D-M	Full	1	1	0	NA	00:02	NA	0	NA	5	NA	left	body	1	F	F	F	0	0	NA	NA	NA	NA	NA	NA
MAH01230	20131117	16:18	00:01:02	Diddy	Juvenile	7	NA	NA	M	D-M	Full	1	1	0	NA	00:07	NA	0	NA	9	NA	left	head	0	F	F	F	0	0	NA	NA	NA	NA	NA	NA
MAH01231	20131117	16:26	00:00:36	Diddy	Juvenile	7	NA	NA	M	D-M	Full	1	1	0	NA	00:03	NA	0	NA	9	NA	left	NA	NA	M	R	F	0	0	NA	NA	NA	NA	NA	NA
MAH01232	20131117	16:28	00:00:53	Diddy	Juvenile	7	NA	NA	M	D-M	Full	1	1	0	NA	00:02	NA	0	NA	5	NA	left	body	1	F	F	F	0	0	NA	NA	NA	NA	NA	NA
MAH01234	20131117	16:30	00:00:31	Diddy	Juvenile	7	NA	NA	M	D-M	Full	1	1	0	NA	00:04	NA	0	NA	7	NA	left	limbs	1	F	F	F	0	0	NA	NA	NA	NA	NA	NA
MAH01235	20131117	16:34	00:00:48	Diddy	Juvenile	7	NA	NA	M	D-M	Full	1	1	0	NA	00:04	NA	0	NA	9	NA	left	head	0	F	F	F	0	0	NA	NA	NA	NA	NA	NA
MAH01236	20131117	16:41	00:00:50	Diddy	Juvenile	7	NA	NA	M	D-M	Full	1	1	0	NA	00:06	NA	0	NA	14	NA	left	body	1	F	F	F	0	0	NA	NA	NA	NA	NA	NA
MAH01239	20131117	17:44	00:00:36	Diddy	Juvenile	7	NA	NA	M	D-M	Full	1	1	0	NA	NA	NA	NA	3	3	1	right	body	1	F	F	F	0	0	NA	NA	NA	NA	NA	NA
MAH01240	20131117	17:54	00:08:25	Diddy	Juvenile	7	NA	NA	M	D-M	Full	1	1	0	NA	00:04	NA	0	NA	8	NA	left	limbs	1	F	F	N	0	0	NA	NA	NA	NA	NA	NA
S1160001	20131117	06:22	00:04:21	Diddy	Juvenile	7	NA	NA	M	D-M	Full	5	1	1	NA	00:33	NA	0	NA	50	NA	left	limbs	1	R	R	R	0	0	NA	NA	NA	NA	NA	NA
S1160001	20131117	06:22	00:04:21	Diddy	Juvenile	7	NA	NA	M	D-M	Full	5	2	1	00:40	00:46	00:07	1	6	8	1.333333333	left	body	1	R	R	R	0	0	NA	NA	NA	NA	NA	NA
S1160001	20131117	06:22	00:04:21	Diddy	Juvenile	7	NA	NA	M	D-M	Full	5	3	1	00:58	01:03	00:12	1	4	7	1.75	left	limbs	1	R	R	M	1	0	NA	NA	NA	NA	NA	NA
S1160001	20131117	06:22	00:04:21	Diddy	Juvenile	7	NA	NA	M	D-M	Full	5	4	1	02:14	02:26	01:11	0	12	22	1.833333333	left	switch	1	M	R	M	1	0	NA	NA	NA	NA	NA	NA
S1160001	20131117	06:22	00:04:21	Diddy	Juvenile	7	NA	NA	M	D-M	Full	5	5	1	02:58	03:10	00:32	0	12	17	1.416666667	left	limbs	1	M	R	M	1	0	NA	NA	NA	NA	NA	NA
S1160003	20131117	06:44	00:01:43	Diddy	Juvenile	7	NA	NA	M	D-M	Full	1	1	0	00:03	00:03	NA	0	0.5	1	2	left	limbs	1	F	F	F	0	0	NA	NA	NA	NA	NA	NA
S1160037	20131117	10:29	00:00:20	Diddy	Juvenile	7	NA	NA	M	D-M	Full	1	1	0	00:00	00:01	NA	0	2	1	0.5	right	body	1	M	R	M	1	0	NA	NA	NA	NA	NA	NA
S1160040	20131117	10:48	00:00:21	Diddy	Juvenile	7	NA	NA	M	D-M	Full	1	1	0	00:08	00:10	NA	0	2	3	1.5	right	limbs	1	F	F	M	1	0	NA	NA	NA	NA	NA	NA
S1160031	20131117	09:43	00:00:24	Diddy	Juvenile	7	NA	NA	M	D-M	Full	1	1	0	NA	NA	NA	NA	NA	4	NA	left	head	0	M	R	M	1	0	NA	NA	NA	NA	NA	NA
S1160017	20131117	08:17	00:00:27	Diddy	Juvenile	7	NA	NA	M	D-M	Full	1	1	0	00:15	00:16	NA	0	1	1	1	right	head	0	M	R	M	1	0	NA	NA	NA	NA	NA	NA
S1160054	20131117	12:21	00:00:28	Diddy	Juvenile	7	NA	NA	M	D-M	Full	1	1	0	NA	00:10	NA	0	NA	10	NA	left	body	1	R	R	R	0	0	NA	NA	NA	NA	NA	NA
S1160055	20131117	12:29	00:00:27	Diddy	Juvenile	7	NA	NA	M	D-M	Full	1	1	0	NA	00:03	NA	0	NA	10	NA	right	limbs	1	R	R	M	1	0	NA	NA	NA	NA	NA	NA
S1160041	20131117	10:51	00:00:32	Diddy	Juvenile	7	NA	NA	M	D-M	Full	1	1	0	NA	NA	NA	NA	NA	2	NA	right	limbs	1	M	M	M	1	0	NA	NA	NA	NA	NA	NA
S1160053	20131117	12:13	00:00:33	Diddy	Juvenile	7	NA	NA	M	D-M	Full	1	1	0	NA	00:05	NA	0	NA	11	NA	left	head	0	M	R	M	1	0	NA	NA	NA	NA	NA	NA
S1160034	20131117	10:08	00:00:32	Diddy	Juvenile	7	NA	NA	M	D-M	Full	1	1	0	NA	NA	NA	NA	NA	3	NA	right	body	1	F	F	F	0	0	NA	NA	NA	NA	NA	NA
S1160045	20131117	11:07	00:00:43	Diddy	Juvenile	7	NA	NA	M	D-M	Full	1	1	0	NA	00:01	NA	0	NA	10	NA	right	switch	1	M	R	M	1	0	NA	NA	NA	NA	NA	NA
S1160004	20131117	06:48	00:02:25	Diddy	Juvenile	7	NA	NA	M	D-M	Full	1	1	0	01:40	01:49	NA	0	9	15	1.666666667	left	limbs	1	F	R	F	0	0	NA	NA	NA	NA	NA	NA
S1160007	20131117	07:04	00:01:14	Ellie	Adolescent	14	NA	NA	F	D-F	Full	1	1	0	00:10	00:11	NA	0	1	1	1	left	head	0	F	F	F	0	0	NA	NA	NA	NA	NA	NA
S1160014	20131117	08:12	00:01:32	Diddy	Juvenile	7	NA	NA	M	D-M	Full	3	1	1	00:20	00:22	NA	0	2	2	1	left	head	0	F	F	F	0	0	NA	NA	NA	NA	NA	NA
S1160014	20131117	08:12	00:01:32	Diddy	Juvenile	7	NA	NA	M	D-M	Full	3	2	1	01:00	01:00	00:38	0	0.5	1	2	left	head	0	F	F	F	0	0	NA	NA	NA	NA	NA	NA
S1160014	20131117	08:12	00:01:32	Diddy	Juvenile	7	NA	NA	M	D-M	Full	3	3	1	01:14	01:15	00:14	1	1	2	2	left	head	0	F	F	F	0	0	NA	NA	NA	NA	NA	NA
S1160015	20131117	08:15	00:01:05	Diddy	Juvenile	7	NA	NA	M	D-M	Full	1	1	0	00:03	00:07	NA	0	4	4	1	right	head	0	F	F	F	0	0	NA	NA	NA	NA	NA	NA
S1160016	20131117	08:16	00:00:47	Diddy	Juvenile	7	NA	NA	M	D-M	Full	1	1	0	00:03	00:05	NA	0	2	4	2	right	head	0	F	F	F	0	0	NA	NA	NA	NA	NA	NA
S1160029	20131117	09:21	00:02:52	Diddy	Juvenile	7	NA	NA	M	D-M	Full	3	1	1	NA	00:03	NA	0	NA	5	NA	right	body	1	F	F	F	0	0	NA	NA	NA	NA	NA	NA
S1160029	20131117	09:21	00:02:52	Diddy	Juvenile	7	NA	NA	M	D-M	Full	3	2	1	01:36	01:36	01:33	0	1	1	1	right	limbs	1	F	F	F	0	0	NA	NA	NA	NA	NA	NA
S1160029	20131117	09:21	00:02:52	Diddy	Juvenile	7	NA	NA	M	D-M	Full	3	3	1	01:43	01:46	00:07	1	3	4	1.333333333	right	limbs	1	F	F	F	0	0	NA	NA	NA	NA	NA	NA
S1160032	20131117	09:51	00:01:24	Diddy	Juvenile	7	NA	NA	M	D-M	Full	2	1	1	NA	00:00	NA	0	NA	2	NA	left	limbs	1	F	F	F	0	0	NA	NA	NA	NA	NA	NA
S1160032	20131117	09:51	00:01:24	Diddy	Juvenile	7	NA	NA	M	D-M	Full	2	2	1	00:51	00:56	00:51	0	5	2	0.4	left	limbs	1	F	F	M	1	0	NA	NA	NA	NA	NA	NA
S1160036	20131117	10:12	00:00:49	Diddy	Juvenile	7	NA	NA	M	D-M	Full	1	1	0	00:00	00:06	NA	0	6	8	1.333333333	right	limbs	1	M	R	R	0	0	NA	NA	NA	NA	NA	NA
S1160038	20131117	10:31	00:02:15	Diddy	Juvenile	7	NA	NA	M	D-M	Full	2	1	1	00:13	00:16	NA	0	3	6	2	right	limbs	1	F	F	F	0	0	NA	NA	NA	NA	NA	NA
S1160038	20131117	10:31	00:02:15	Diddy	Juvenile	7	NA	NA	M	D-M	Full	2	2	1	01:30	01:35	01:14	0	5	9	1.8	right	limbs	1	F	R	M	1	0	NA	NA	NA	NA	NA	NA
S1160048	20131117	11:31	00:00:50	Diddy	Juvenile	7	NA	NA	M	D-M	Full	1	1	0	NA	00:02	NA	0	NA	10	NA	right	limbs	1	M	R	M	1	0	NA	NA	NA	NA	NA	NA
S1160058	20131117	13:13	00:01:04	Diddy	Juvenile	7	NA	NA	M	D-M	Full	1	1	0	NA	NA	NA	NA	5	NA	NA	left	body	1	M	R	M	1	0	NA	NA	NA	NA	NA	NA
S1160059	20131117	13:44	00:03:34	Diddy	Juvenile	7	NA	NA	M	D-M	Full	2	1	1	NA	00:04	NA	0	NA	9	NA	right	body	1	F	F	F	0	0	NA	NA	NA	NA	NA	NA
S1160059	20131117	13:44	00:03:34	Diddy	Juvenile	7	NA	NA	M	D-M	Full	2	2	1	00:52	00:59	00:48	0	7	2	0.285714286	right	body	1	F	F	F	0	0	NA	NA	NA	NA	NA	NA
S1160063	20131117	14:23	00:01:31	Diddy	Juvenile	7	NA	NA	M	D-M	Full	1	1	0	00:34	00:45	NA	0	11	18	1.636363636	right	body	1	R	R	F	0	0	NA	NA	NA	NA	NA	NA
S1160064	20131117	14:25	00:00:46	Diddy	Juvenile	7	NA	NA	M	D-M	Full	1	1	0	00:00	00:05	NA	0	5	12	2.4	right	head	0	R	R	R	0	0	NA	NA	NA	NA	NA	NA
S1160065	20131117	14:55	00:00:51	Diddy	Juvenile	7	NA	NA	M	D-M	Full	1	1	0	NA	00:03	NA	0	NA	12	NA	right	limbs	1	R	R	R	0	1	Gura	None	oth	NA	NA	NA
S1160068	20131117	15:16	00:02:36	Diddy	Juvenile	7	NA	NA	M	D-M	Full	3	1	1	00:50	00:50	NA	0	0.5	1	2	left	body	1	W	W	W	1	1	Gura	None	oth	1	1	NA
S1160068	20131117	15:16	00:02:36	Diddy	Juvenile	7	NA	NA	M	D-M	Full	3	2	1	01:53	01:53	01:03	0	1	1	1	left	limbs	1	R	R	R	0	1	Gura	None	oth	0	0	NA
S1160068	20131117	15:16	00:02:36	Diddy	Juvenile	7	NA	NA	M	D-M	Full	3	3	1	01:59	02:02	00:06	1	3	4	1.333333333	left	limbs	1	R	R	F	0	1	Gura	None	oth	0	0	NA
S1160069	20131117	15:19	00:03:22	Diddy	Juvenile	7	NA	NA	M	D-M	Full	1	1	0	01:54	02:13	NA	0	19	29	1.526315789	left	limbs	1	W	R	R	0	1	Gura	None	oth	1	0	NA
S1160070	20131117	15:23	00:01:41	Diddy	Juvenile	7	NA	NA	M	D-M	Full	1	1	0	NA	NA	NA	NA	NA	2	NA	left	body	1	R	R	R	0	0	NA	NA	NA	NA	NA	NA
S1160070	20131117	15:23	00:01:41	Diddy	Juvenile	7	NA	NA	M	D-M	Full	1	1	0	00:56	01:03	NA	0	9	13	1.444444444	right	limbs	1	M	R	R	0	0	NA	NA	NA	NA	NA	NA
